# Supplementary material for: Conserved Small Nucleotidic Elements at the Origin of Concerted piRNA Biogenesis from Genes and lncRNAs
Source: MDPI journal article supplement (doi:10.3390/cells9061491), 2020-06-18

### Supplemental Figures:

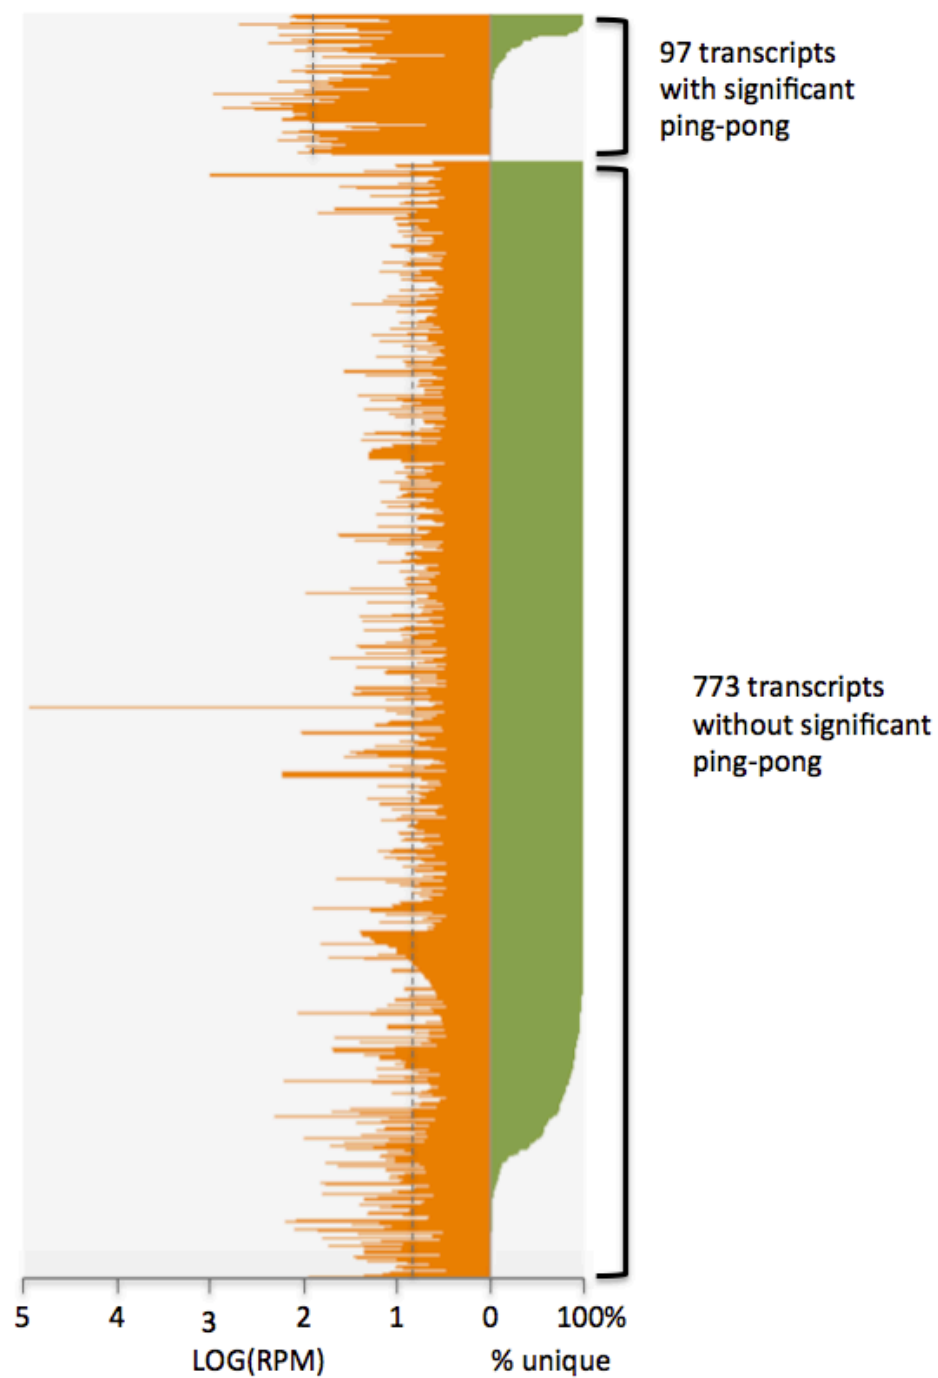

### SFig1 - Amounts of piRNAs and percentages of genome-unique piRNAs.

Shown are the amounts of piRNAs (LOG of piRNA count in RPM, orange) and percentages of genome-unique piRNAs (green) for each of 870 mRNAs matching >3 RPM piRNAs. For amounts of piRNAs, medians for each category of transcripts are indicated by dotted lines.





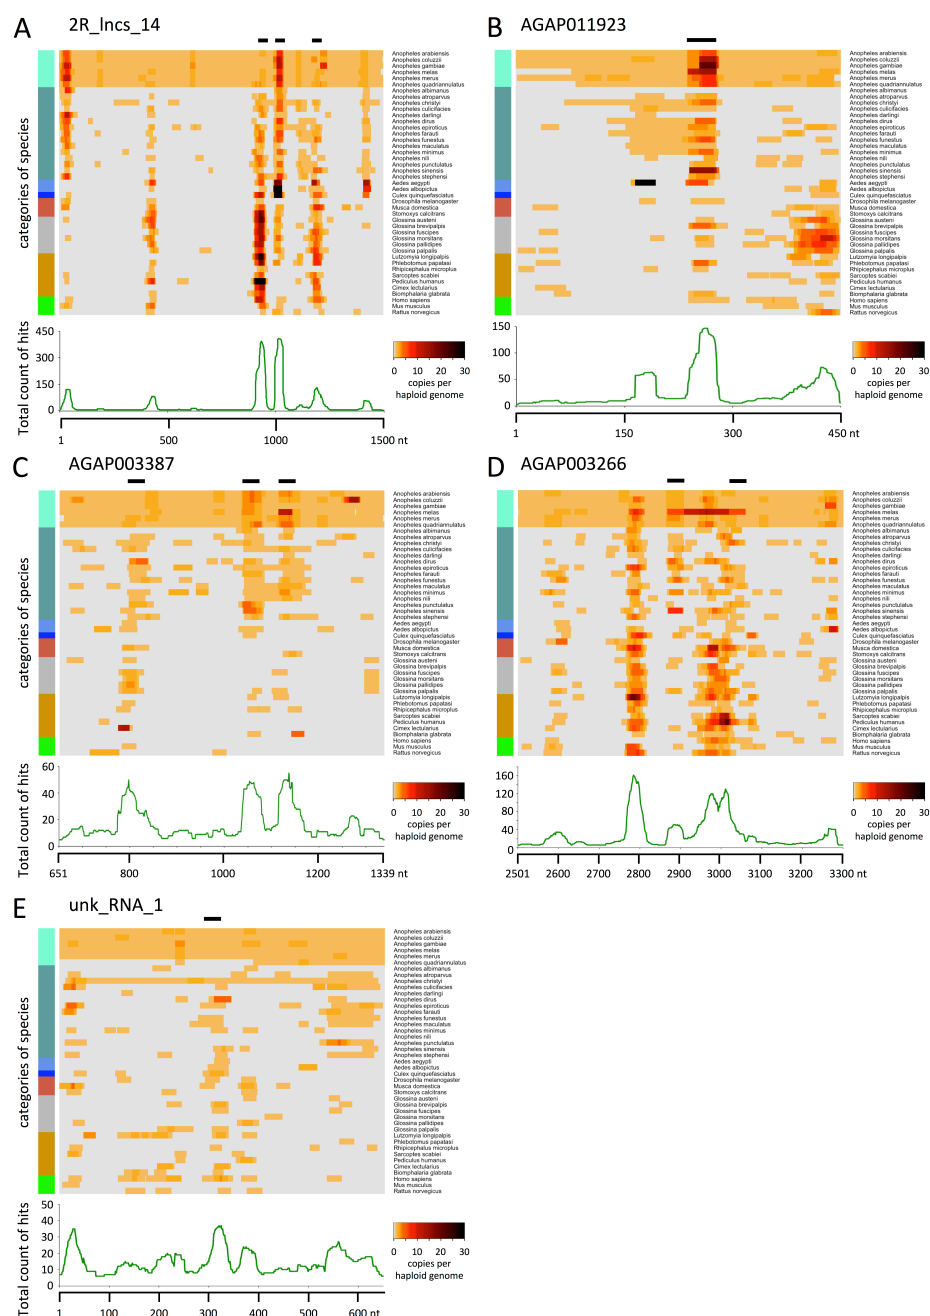

# **SFig4: BLASTN results reveal short conserved repeats, the snetDNAs (e-value $\leq 1$ ). (Complement to Figure 5)**

Heat maps illustrating Blastn results, with a maximal e-value of 1.0, for network transcripts 2R\_lncs\_14 (A), AGAP011923-RA (B), AGAP003387-RA (C), AGAP003266 3'-UTR (D), and unk\_RNA\_1 (E) aligned to genomes of 43 different species. The counts of hits are plotted along each transcript for each individual species. Zero hit is in light grey. A color code for different categories of species is presented on the left. Mosquitoes are in different blue colors: *An. gambiae* complex, light blue, other *Anopheles*, cadet blue, *Aedes*, cornflower blue, and *Culex*, blue; coral: flies; gray: tsetse; green: mammals; dark golden: other species including snail, body louse, bed bugs, tick, mite, and sand flies. Horizontal bars above the heat map indicate the trigger-responder sites (spanning over the trigger-annealing site and the corresponding responder-piRNAs). Below each heat map, a graphical representation of the totalized counts of hits for all analyzed species mapped for each position of the transcript. The detailed BLASTN results with the aligned sequences can be found in Supplemental Table S10.



### Trigger-piRNAs:

|                                          |                                                                          |            |
|------------------------------------------|--------------------------------------------------------------------------|------------|
| <i>An. gambiae</i> AGAP011923:           | <b>U</b> UAUCAGAAA <b>U</b> UUUAAGUGGUUGUUUCAUG                          | 63.9 RPM   |
| <i>Ae. aegypti</i> AAEL017228:           | UUAA <b>U</b> AGAAA <b>U</b> U <b>AC</b> AGUGGUUG <b>GU</b> <b>AUCUU</b> | 3505.6 RPM |
| <i>Ae. aegypti</i> AAEL009512-3'-region: | UUAA <b>U</b> AGAAA <b>U</b> U <b>AC</b> AGUGGUUG <b>GUCUUUU</b>         | 556.6 RPM  |
| Mouse fetal testes piRNA:                | UUAU <b>AUGUAA</b> <b>GUACACUG</b> - <b>UAGCUGUCU</b>                    | 25.6 RPM   |
| Mouse adult testes piRNA:                | UUAU <b>AUGUAA</b> <b>GUACACUG</b> - <b>UAGCGUCUU</b>                    | 5.0 RPM    |

### Responder-piRNAs:

|                                              |                                                          |           |
|----------------------------------------------|----------------------------------------------------------|-----------|
| <i>An. gambiae</i> 2R_lncs_14 position 1009: | <b>U</b> UUCUCAA <b>U</b> AU-UUUCUAUACCCUAAAUUU          | 11.6 RPM  |
| <i>Ae. aegypti</i> 2R_lncs_14 ortholog:      | UUUCUCAA <b>U</b> AU-UUUCUAU <b>UUCCUAUUCGU</b>          | 270.3 RPM |
| <i>Ae. aegypti</i> 2R_lncs_14 ortholog:      | UUUCUC <b>UAU</b> AU <b>A</b> UUUCUAU <b>UUAC-AAUUCG</b> | 32.0 RPM  |
| <i>An. gambiae</i> 2R_lncs_14 position 1407: | <b>U</b> GUGAUAAU <b>U</b> AUCACUA-CGGAAAUUUUUC          | 8.0 RPM   |
| <i>Ae. aegypti</i> 2R_lncs_14 ortholog:      | <b>CGUGAUAAU</b> AUCACUA-CGGAA-UAAU <b>AUUU</b>          | 782.8 RPM |
| Mouse adult testes piRNA:                    | <b>UCUGUCAACA</b> - <b>GACUAUCAGAAU-UUCAAGC</b>          | 4.1 RPM   |

**SFig5 - SnetDNA-network piRNAs in *Ae. aegypti* and similar piRNAs matching snetDNAs in mouse fetal and adult testes.**

Shown are network piRNAs found in *Ae. aegypti* and piRNAs matching snetDNAs, drawn from data of Figure 5, in mouse fetal and adult testes. Dissimilarities with respect to the corresponding *An. gambiae* piRNAs are highlighted in red. Nucleotides that are identical between mouse and *Ae. aegypti* piRNAs are in green. 1U and 10A are in bold and pointed by black dots. On the right, the respective amounts of piRNAs (RPM).



**Table S13**

| piRNA nb. | <i>Ae. aegypti</i> locus                | corresponding <i>An. gambiae</i> locus | nature of piRNA   | piRNA-sequence <i>Ae. aegypti</i> (corresponding piRNA-sequence in <i>An. gambiae</i> ) | mapnum vs. genome | mapnum vs. 2R_Incs_14 orthologs | RPM    |
|-----------|-----------------------------------------|----------------------------------------|-------------------|-----------------------------------------------------------------------------------------|-------------------|---------------------------------|--------|
| 1         | AAEL017228-RA                           | AGAP011923-RA                          | trigger/responder | UUAAUAGAAAUACAGUGGUUGGUUCUU<br>(UUUUCAGAAUUUAAGUGGUUGUUUCAUG)                           | 1                 | 0                               | 3505.6 |
| 2         | AAEL009512-3'-region                    | AGAP011923-RA                          | trigger/responder | UUAAUAGAAAUACAGUGGUUGGUUUUU<br>(UUUUCAGAAUUUAAGUGGUUGUUUCAUG)                           | 1                 | 0                               | 556.6  |
| 3         | Aaeg_unk_RNA_1                          | none                                   | responder         | UUUACUAUUAAAAUCCAACGGAUGCCUC                                                            | 1                 | 0                               | 58.1   |
| 4         | 2R_Incs_14 orthologs                    | 2R_Incs_14 position 1009               | responder         | UUUCUCAAUUAUUUCUAUUUCCUAUUCGU<br>(UUUUCUCAAUUAUUUCUAUACCCUAAAUUU)                       | 27                | 25                              | 270.3  |
| 5         | AAeg_2R_Incs_14-J (2R_Incs_14 ortholog) | 2R_Incs_14 position 1009               | responder         | UUUCUCUAUAUUAUUUCUAUUUAC-AAUUCG<br>(UUUUCUCAAUAU-UUUUAUACCCUAAAUUU)                     | 5                 | 5                               | 32.0   |
| 6         | 2R_Incs_14 orthologs                    | 2R_Incs_14 position 1407               | responder         | CGUGAUUAUAUCACUACGGAA-UAUUUUU<br>(UGUGAUUAUAUCACUACGGAAUAUUUUC)                         | 42                | 42                              | 782.8  |
| 7         | AAEL002913-3'-region                    | none                                   | trigger/responder | CAAUAUCACGUUUCGAAACACUUUGUUG                                                            | 1                 | 0                               | 170.2  |

## SI-MSA1

### Supplemental Information: Multiple Sequence Alignment Ping-pong networks

Ping-pong network 1:

CLUSTAL O(1.2.4) multiple sequence alignment (<https://www.ebi.ac.uk/Tools/msa/clustalo/>)

|               |                                                               |     |
|---------------|---------------------------------------------------------------|-----|
| AGAP012458-RA | -----                                                         | 0   |
| AGAP001088-RA | -----                                                         | 0   |
| AGAP012431-RA | -----                                                         | 0   |
| AGAP012766-RA | -----                                                         | 0   |
| AGAP003677-RA | AGGTTGTGTGTGTAACAAAAACGTAAACAGTGTGTTGGCTGATCAA-TTTTGGTAAGTTT  | 59  |
| AGAP012489-RA | -----CAAGTGCGGTAAGTTT                                         | 16  |
| AGAP007403-RA | AAGTTGTGTGTGTAACAAAAACCTAAACAGTGTGTTGGCTGATCAAATTTTGGTAAGTTT  | 60  |
| AGAP012182-RA | -----                                                         | 0   |
|               |                                                               |     |
| AGAP012458-RA | -----                                                         | 0   |
| AGAP001088-RA | -----GTCTTAATTTTACGTAAGTAAGTGCCATTTTAGCAAAAGTTAGTGGT          | 47  |
| AGAP012431-RA | -----GTCTTAATTTTACGTAAGTAAGTGCCATTTTAGCAAAAGTTAGTGGT          | 47  |
| AGAP012766-RA | -----GTGGT                                                    | 5   |
| AGAP003677-RA | TTTAATAATTAAGTCTTAATTTTACGTAAGTAAGTGCCATTTTAGCTAAATTAAGTGGT   | 119 |
| AGAP012489-RA | TTTAATAATTAATGTTCTTAATTTTACGTAAGTAAGTGCCATTTTAGCAAAAGAAAGTGGT | 76  |
| AGAP007403-RA | TTTAATAATTTAGTCTTAATTTTACGTAAGTAAGTGCCATTTTAGCAAAAGTAAGTGGT   | 120 |
| AGAP012182-RA | -----GTGGT                                                    | 5   |
|               |                                                               |     |
| AGAP012458-RA | -----                                                         | 0   |
| AGAP001088-RA | AGAAGTCCTGCCCAATGCGTGCTGGCTCCGTCGAAAGCGTTACGTGCATGTACCGGCGTA  | 107 |
| AGAP012431-RA | AGAAGTCCTGCCCAATGCGTGCTGGCTCCGTCGGAAGCGTTACGTGCATGTACCGGCGTA  | 107 |
| AGAP012766-RA | AGAAGTCCTGCCCAATGCGTGCTGGCTCCGTCGGAAGCGTTACGTGCATGTACCGGCGTA  | 65  |
| AGAP003677-RA | AGAAATCCTGCCCAATGCGTGCTGGCTCCGTCGGAAGCGGTACGTGTATGTACCGGCGTA  | 179 |
| AGAP012489-RA | AGAAGTCCTGCCCAATGCGTGCTGGCTCCGTCGGAAGCGTTACGTGCATGTACCGGCGTA  | 136 |
| AGAP007403-RA | AGAAGTCCTGCCCAATGCGTGCTGGCTCCGTCGGAAGCGGTACGTGCATGTACCGGCGTA  | 180 |
| AGAP012182-RA | AGAAGTCCTGCCCAATGCGTGCTGGCTCCGTCGGAAGCGGTACGTGCATGTACTGGCGTA  | 65  |
|               |                                                               |     |
| AGAP012458-RA | -----                                                         | 0   |
| AGAP001088-RA | GGAAAGTGATGTGGTGAACAACACAGCACAAAGACAGCGGATATAATGCA-----       | 156 |
| AGAP012431-RA | GGAAAGTGATGTGGTGAACAACACAGCACAAAGACAGCGGATATAATGCA-----       | 156 |
| AGAP012766-RA | GGAAAGTGATGTGGTGAACAACACAGCACAAAGACACG-----                   | 103 |
| AGAP003677-RA | GGAAAGTGCGGTGATGAACAACACAGCACAAAGACAGCA-----                  | 217 |
| AGAP012489-RA | GGAAAGTGATGTGGTGAACAACACAGCACAAAGACAGCG-----                  | 174 |
| AGAP007403-RA | GGAAAGTGATGTGGTGAACAACACAGCACAAAGACAGCGGTAAGTGTATCCAGCGATTA   | 240 |
| AGAP012182-RA | GGAAAGTGATGTGATGAACAACACAGCAT-----                            | 94  |
|               |                                                               |     |
| AGAP012458-RA | -----                                                         | 0   |
| AGAP001088-RA | -----                                                         | 156 |
| AGAP012431-RA | -----                                                         | 156 |
| AGAP012766-RA | -----GATATAATG                                                | 112 |
| AGAP003677-RA | -----GATATAATG                                                | 226 |
| AGAP012489-RA | -----GATATAATT                                                | 183 |
| AGAP007403-RA | TCATGATTAAAGAACATTATTTTAATAGAATATGGCCACTTTTAACTTGCGATATAATG   | 300 |
| AGAP012182-RA | -----AAGACAACGGATATAATG                                       | 112 |
|               |                                                               |     |
| AGAP012458-RA | -----                                                         | 0   |
| AGAP001088-RA | --GAAATGATA-----TGCGGCAGGTGTTTGCGACTGTA-----CGTTGCGTTGTATAT   | 203 |
| AGAP012431-RA | --GAAATGATA-----TGCGGCAGGTGTTTGCGACTGTA-----CGTTGCGTTGTATAT   | 203 |
| AGAP012766-RA | CAGAAATGATATGGGCCTGCCCTCAGGTGTTTGCGACTGTGCGCTGTGTATGATTGTGTAT | 172 |
| AGAP003677-RA | CAGAAACGAAATGGGCCTGCCAGGTGATTGCCACTGTGCGCTGTGTATGATTGTGTAT    | 286 |
| AGAP012489-RA | CAGAAACGATATGGGCCTGCCGCAGGTGTTTGCGACTGTGCGCTGTGTATGATTGTGTAT  | 243 |
| AGAP007403-RA | CAGAAACGATATGGGCCTGCCGCAGGTGTTTGCGACTGTGCGCTGTGTATGATTGTGTAT  | 360 |
| AGAP012182-RA | CAGAAACGATATGGGCCTGCCGCAGGTGTTTGCGACTGTGCGCTGTGTATGATTGTGTAT  | 172 |
|               |                                                               |     |
| AGAP012458-RA | -----                                                         | 0   |
| AGAP001088-RA | GATTCGCCAATTTTCTCTATCCT-GGAACGTGGGCTTACGAGGAACCATTTAAGAACAT   | 262 |
| AGAP012431-RA | GATTCGCCAATTTTCTCTATCCT-GGAACGTGGGCTTACGAGGAACCATTTAAGAACAT   | 262 |
| AGAP012766-RA | GATTCGCCAATTTTCTCTATCCGTGGAACGTGGGGTTACGAGGAACCGTTCAAGAGGAT   | 232 |
| AGAP003677-RA | GATTCGCCAATTTTCTCTATCCT-GGAACGTGGGCTTACGAGGAACCATTTAAGAACAT   | 345 |
| AGAP012489-RA | GATACGCCAATTTTCTCTATCCT-GGAACGTGGGCTTACGAGGAACCGTTCAAGAAGAT   | 302 |
| AGAP007403-RA | GATACGCCAATTTTCTCTATCCT-GGAACGTGGGCTTACGAGGAACCATTTAAGAACAT   | 419 |
| AGAP012182-RA | GATACGCCAATTTTCTCTATTCT-GGAACGTGGTGTACGATGAACCATTTAAGAACAT    | 231 |

|               |                                                                |     |
|---------------|----------------------------------------------------------------|-----|
| AGAP012458-RA | -----CACGCTAGAGGCCAG                                           | 16  |
| AGAP001088-RA | CATCCGGAAGCTGTACGGCGACGAGTCGGGCTCTACCAGCACAACACGCTGA-GGCCAG    | 321 |
| AGAP012431-RA | CATCCGGAAGCTGTACGGCGACGAGTCGGGCTCTACCAGCACAACACGCTGA-GGCCAG    | 321 |
| AGAP012766-RA | CCTCCGGAAGCTGTACGGCGACGAGTCGGGCTCTACCAGCACAACACGCTAGAGGCCAG    | 292 |
| AGAP003677-RA | CCTCCGGAAGCTGTACAGCGACGAGTCGGGCTCTACCAGCACAACACGCTAGAGGCCAG    | 405 |
| AGAP012489-RA | CCTCCGGAAGCTGTACGGCGACGAGTCGGGCTCTACCAGCACAACACACTAGAGGCCAG    | 362 |
| AGAP007403-RA | CCTCCGGAAGCTGTACGGCGACGAGTCGGGCTCTACCAGCACAACACGCTAGAGACCCAG   | 479 |
| AGAP012182-RA | CCTCCGGGAGCTGTACGGCGACGAATCGGGCTCTACCAGCACAACGCTAGAGACCCAG     | 291 |
|               | *** ** *                                                       |     |
| AGAP012458-RA | CCGGCACCGGGTGCCCCGATTGCGCCGCCAACGGTGTCTGAGCGCGCTCGTTCAAAACGT   | 76  |
| AGAP001088-RA | CCGGCACCGGGTGCCCCGATTGCGCCGCCGGACGGTGTCTGAGGAAAAAACGTTGAAACGT  | 381 |
| AGAP012431-RA | CCGGCACCGGGTGCCCCGATTGCGCCGCCGGACGGTGTCTGAGGAAAAAACGTTGAAACGT  | 381 |
| AGAP012766-RA | CCGGCACCGGGTGCCCCGATTGCGCCGCTCAGACGGTGTAGAG--CGCTCGTTTCAACACGT | 350 |
| AGAP003677-RA | CCGGTACCGGGTGCCCCGATTGCGCCGCTGAGACGGTGTCTGAGCGCGCTCGTTAACACGT  | 465 |
| AGAP012489-RA | CCGGTACCGGGTGCCCCGATTGCGCCGCCAGACGGTGTCTGAGCGCGCTCGTTAACACGT   | 422 |
| AGAP007403-RA | CCGGCACCGGGTGCCCCGATTGCGCCGCCAGACGTTGTCTGAGCGCGCTCGTTACACACGT  | 539 |
| AGAP012182-RA | CCGGCACCGGGTGCCCCGATTGCGCCGCTCAGACGGTGTCTGAGCGCGCTCGTTACACACGT | 351 |
|               | *** ***** ** ** *                                              |     |
| AGAP012458-RA | TCGGGGCAGGAATTCAACCTTCGGATCATT---ATCCTCTGCCTCACAATAGCTGCAGC    | 133 |
| AGAP001088-RA | TCGGGGCAGGAATTCAACCTTCGGATCCTCATTATCCTCTGCCCCACAATAGCTGCAGC    | 441 |
| AGAP012431-RA | TCGGGGCAGGAATTCAACCTTCGGATCCTCATTATCCTCTGCCCCACAATAGCTGCAGC    | 441 |
| AGAP012766-RA | TCGGGACAGAAATCAACCTTCGGATCATT---ATCCTCTGCCTCACAATAGCTGCAGC     | 407 |
| AGAP003677-RA | TCGGGGCAGGAATTCAACCTTCGGATCATTAT---CCTCTGCCTCACAATAGCTGCAGC    | 522 |
| AGAP012489-RA | TCGGGGCAGGAATTCAACCTTCGGATCTGCATTATCCTCTGCCTCACAATAGCTGCAGC    | 482 |
| AGAP007403-RA | TCGGGGCAGGAATTGAACCTTCGGATCATT---ATCCTCTGGCTCACAATAGCTGCAGC    | 596 |
| AGAP012182-RA | TCGGGGCAGGAATTCAACCTTCGGATCTGCATTATCCGCTGTCCCACAATAGCTGCAGC    | 411 |
|               | ***** ** * ***** ** * *                                        |     |
| AGAP012458-RA | AGCAACAGGACCGAACCGAC---CGCACTACTGATTGCGGTCAAATTTCTTGGCAGGAGA   | 190 |
| AGAP001088-RA | AGCAACAGGACCGAACCGAC---CGCACTACTGATTGCGGTCAAATTTCTTGGCAGGAGA   | 498 |
| AGAP012431-RA | AGCAACAGGACCGAACCGAC---CGCACTACTGATTGCGGTCAAATTTCTTGGCAGGAGA   | 498 |
| AGAP012766-RA | AGCAACAGGACTGAACCGAC---CGCACTACTGATTGCGGTCAAATTTCTTGGCAGGAGA   | 464 |
| AGAP003677-RA | AGCATCAGGACCGAACCGACCGACCGCACTACTGATTGCGGTCAAATTTCTGTG-----    | 574 |
| AGAP012489-RA | AGCAACAGGACCGAACCGAC---CGCACTA-----                            | 509 |
| AGAP007403-RA | AGCAACAGGACCGAACCGAC---CGCACTACGGATTGCGGTCAAATTTCTTGGCAGGAGA   | 653 |
| AGAP012182-RA | AGCAACAGGACCGAACCGAC---CGCAGTACTGATTGCGGTCAAATTTCTGTG-----     | 460 |
|               | ***** ***** **** **                                            |     |
| AGAP012458-RA | AAAAACCCACAAAGCGTATCGATTTTCATCGACGGCCGCTCGCTGACGGCACCAACATGCC  | 250 |
| AGAP001088-RA | AAAAACCCACAGAGTGTATCGATTTTCATCGACGGTCGCTCGCTGGCAGCACCGACAAACA  | 558 |
| AGAP012431-RA | AAAAACCCACAGAGTGTATCGATTTTCATCGACGGTCGCTCGCTGGCAGCACCGACAAACA  | 558 |
| AGAP012766-RA | AAAAATCCCACAAGTGTATCGATTTTCATCGACGGCCGCTCGCTGGCGGCACCAACATACC  | 524 |
| AGAP003677-RA | -----                                                          | 574 |
| AGAP012489-RA | -----                                                          | 509 |
| AGAP007403-RA | -AAAACCCACAGAGTGTATCGATTTTCATGGACGGCCGCTCGCTGACGGCACCAACATGCC  | 712 |
| AGAP012182-RA | -----                                                          | 460 |
| AGAP012458-RA | ACTGAATAACCCCGAAAGCGACAAAGCACTCATTTCCAGCGGTAAATTGTTAACATCAA    | 310 |
| AGAP001088-RA | CTCATCACAGTGGCGACAGTGGCAAATTGTTAACGTGAACCCACTTCCGCC-CATCTACA   | 617 |
| AGAP012431-RA | CTCATCACAGTGGCGACAGTGGCAAATTGTTAACGTGAACCCACTTCCGCC-CATCTACA   | 617 |
| AGAP012766-RA | ACTGGATAACCTTGGAAGGCGACAAACATCACGACATCACGTGAATAGTGTATTAGAGT    | 584 |
| AGAP003677-RA | -----                                                          | 574 |
| AGAP012489-RA | -----                                                          | 509 |
| AGAP007403-RA | ACTGAATAACCCCGAAAGACGACAAAGCACTCATCTCCAGCGGCAAATTGTTAACATCAA   | 772 |
| AGAP012182-RA | -----                                                          | 460 |
| AGAP012458-RA | TCCTCTTCCGCACATCTACACGACATCATGATAATAGTGTTATTGTGTAAATTGTAAAAA   | 370 |
| AGAP001088-RA | CGACATCGCGT-----                                               | 628 |
| AGAP012431-RA | CGACATCGCGT-----                                               | 628 |
| AGAP012766-RA | TTATTGAACAA-----                                               | 595 |
| AGAP003677-RA | -----                                                          | 574 |
| AGAP012489-RA | -----                                                          | 509 |
| AGAP007403-RA | TCCTCTTCCGC-----                                               | 783 |
| AGAP012182-RA | -----                                                          | 460 |
| AGAP012458-RA | AAAATACGTTAATGAGTTAAGATTAATCTTAAGTGCCTTTAAGGCATACATCGATATGC    | 430 |
| AGAP001088-RA | TAATAGTGTTATTGTGTTAATTGGAAAAATAACTTTATG-----TTAACGAGTTAAGT     | 681 |
| AGAP012431-RA | TAATAGTGTTATTGTGTTAATTGGAAAAATAACTTTATG-----TTAACGAGTTAAGT     | 681 |
| AGAP012766-RA | ACTTGATGTTAACGAGTTAAGTTTAAATTTATATGCGCTTTAGGCATAAATCGATATGC    | 655 |
| AGAP003677-RA | -----                                                          | 574 |
| AGAP012489-RA | -----                                                          | 509 |
| AGAP007403-RA | ACATCTAC-----                                                  | 791 |
| AGAP012182-RA | -----                                                          | 460 |

|               |                                                               |     |
|---------------|---------------------------------------------------------------|-----|
| AGAP012458-RA | CTAATTTTAGGTAAAGTGTTTTGAAATGCGCGTGTGTGCGAAGGGTCGAAATGAGCGCTA  | 490 |
| AGAP001088-RA | TTAATCTTAAG-----                                              | 692 |
| AGAP012431-RA | TTAATCTTAAG-----                                              | 692 |
| AGAP012766-RA | CTAATTTTAAGTTAAGTGTTTTGACATGTGCGTGTGTGTAAGGGGCAAAATAAGCGCTA   | 715 |
| AGAP003677-RA | -----                                                         | 574 |
| AGAP012489-RA | -----                                                         | 509 |
| AGAP007403-RA | -----                                                         | 791 |
| AGAP012182-RA | -----                                                         | 460 |
|               |                                                               |     |
| AGAP012458-RA | AGCAAACCTAAGCGGCCGCTAGGGCCCCGTGGTCTTGAGGGGCCCCAAAAATGGAACCCA  | 550 |
| AGAP001088-RA | -----                                                         | 692 |
| AGAP012431-RA | -----                                                         | 692 |
| AGAP012766-RA | AGCAAACCTAAGCGGCCATGTAGGGCCCCGTGGTCTTGAGGGGCCCCAAAAATGGAACCCA | 775 |
| AGAP003677-RA | -----                                                         | 574 |
| AGAP012489-RA | -----                                                         | 509 |
| AGAP007403-RA | -----                                                         | 791 |
| AGAP012182-RA | -----                                                         | 460 |
|               |                                                               |     |
| AGAP012458-RA | CCCCTCGCTCGCTAGTAAATTTACATTTGTGCTTGTAACC-----                 | 592 |
| AGAP001088-RA | -----                                                         | 692 |
| AGAP012431-RA | -----                                                         | 692 |
| AGAP012766-RA | CCCTCCGCTCGCAAGTAAATTTGCTACTCAAACCTTCTCTATACATTTACCTGCTAAACG  | 835 |
| AGAP003677-RA | -----                                                         | 574 |
| AGAP012489-RA | -----                                                         | 509 |
| AGAP007403-RA | -----                                                         | 791 |
| AGAP012182-RA | -----                                                         | 460 |
|               |                                                               |     |
| AGAP012458-RA | -----TACATTTA-----TGAGACTGCCTCCACTCGTATGTGCGGGTTT             | 631 |
| AGAP001088-RA | -----                                                         | 692 |
| AGAP012431-RA | -----                                                         | 692 |
| AGAP012766-RA | CTTCAACCAAACCTACATTTATGTGACTGATTATGGGCCTCCACTCGTATGTGCGGATTT  | 895 |
| AGAP003677-RA | -----                                                         | 574 |
| AGAP012489-RA | -----                                                         | 509 |
| AGAP007403-RA | -----                                                         | 791 |
| AGAP012182-RA | -----                                                         | 460 |
|               |                                                               |     |
| AGAP012458-RA | TATACAACATTTAAGATAAATAAATCTAGTTTATATTCTCAT                    | 673 |
| AGAP001088-RA | -----                                                         | 692 |
| AGAP012431-RA | -----                                                         | 692 |
| AGAP012766-RA | TATACAACATTTTAGATAAATAAATCTAGTTTA-----                        | 928 |
| AGAP003677-RA | -----                                                         | 574 |
| AGAP012489-RA | -----                                                         | 509 |
| AGAP007403-RA | -----                                                         | 791 |
| AGAP012182-RA | -----                                                         | 460 |

# Ping-pong network 1:

Sequence Logo 3.5.0 ([toolshed.g2.bx.psu.edu/repos/devteam/weblogo3/rgweblogo3/3.5.0](http://toolshed.g2.bx.psu.edu/repos/devteam/weblogo3/rgweblogo3/3.5.0))

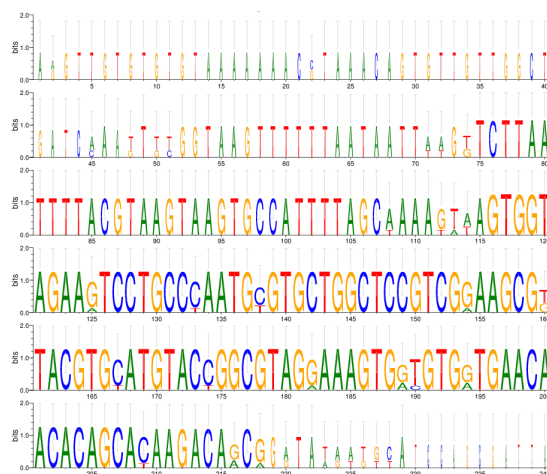

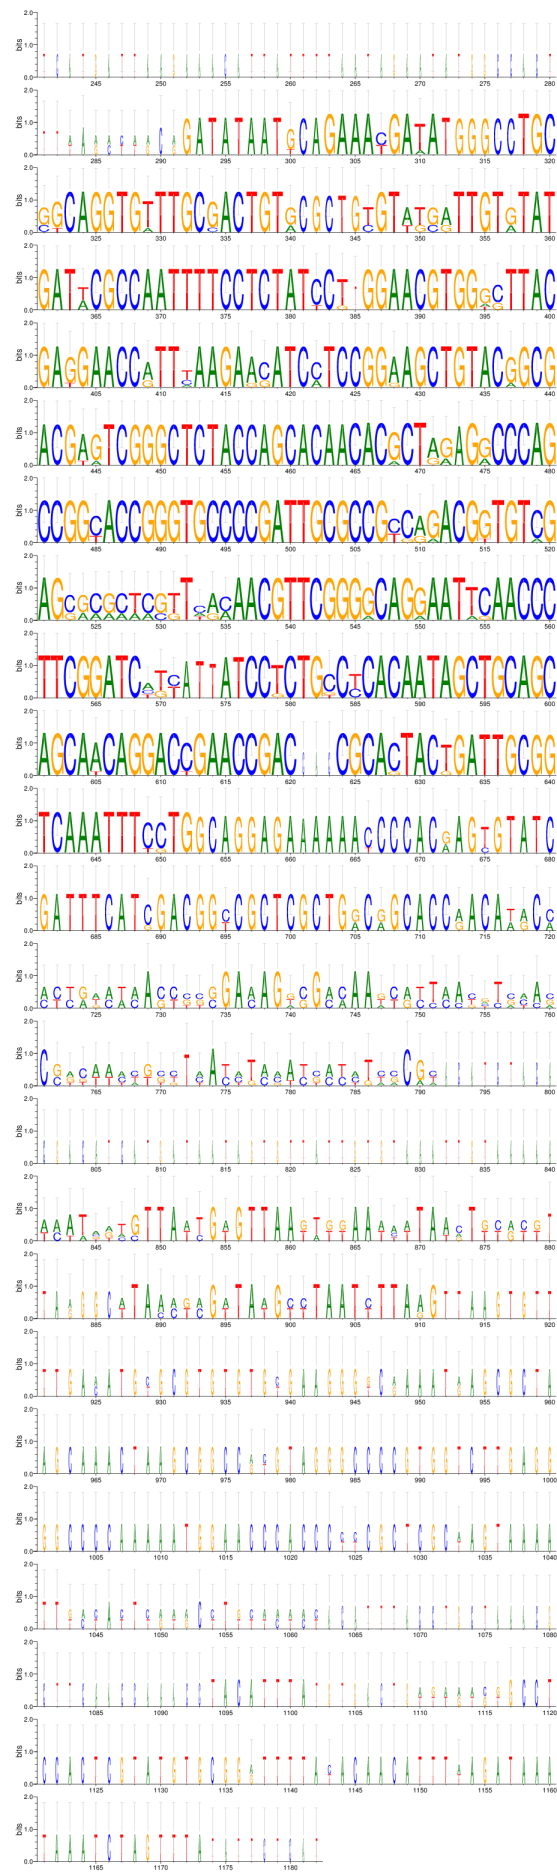



Ping-pong network 2:  
CLUSTAL 2.1 multiple sequence alignment

```
AGAP012483-RA      GGACCGGTCGTCGATGCACTCGAGGTG-CACCGCATTGACGAGCGGCAGTAGCAGGATGC 59
AGAP012762-RA      GGACCGGTCGTCGATGCACTCGAGGTG-CACCGCATTGACGAGCGGCAGTAGCAGGATGC 59
AGAP012700-RA      GGACCGGTCGTCGATGCACTCGAGGTG-CACCGCATTGACGAGCGGCAGTAGCAGGATGC 59
AGAP012752-RA      GGACCGGTCGTCGATGCACTCGAGGTG-CACCGCATTGACGAGCGGCAGTAGCAGGATGC 60
AGAP001087-RA      GGACCGGTCGTCGATGCACTCGAGGTG-CACCGCATTGACGAGCGGCAGTAGCAGGATGC 59
*****

AGAP012483-RA      AATCGGCGCGGCCGAGCTGGCAGCGAAGCCGGTTCTCGGTGAGCCATTACGCGCGAATGA 119
AGAP012762-RA      AATCGGCGCGGCCGAGCTGGCAGCGAAGCCGGTTCTCGGTGAGCCATTACGCGCGAATGA 119
AGAP012700-RA      AATCGGCGCGGCCGAGCTGGCAGCGAAGCCGGTTCTCGGTGAGCCATTACGCGCGAATGA 119
AGAP012752-RA      AATCGGCGCGGCCGAGCTGGCAGCGAAGCCGGTTCTCGGTGAGCCATTACGCGCGAATGA 120
AGAP001087-RA      AATCGGCGCGGCCGAGCTGGCAGCGAAGCCGGTTCTCGGTGAGCCATTACGCGCGAATGA 119
*****

AGAP012483-RA      GGGCGGTCAAGAGCCGGCTGCATACGTTTCGAT-----ATATTGCTACGCGCA 167
AGAP012762-RA      GGGCGGTCAAGAGCCGGCTGCATACGTTTCGAT-----ATATTGCTACGCGCA 167
AGAP012700-RA      GGGCGGTCAAGAGCCGGCTGCATACGTTTCGAT-----ATATTGCTACGCGCA 167
AGAP012752-RA      GGGCGGTCAAGAGCCGGCTGCATACGTTTCGAT-----ATATTGCTACGCGCA 168
AGAP001087-RA      GGGCGGTCAAGAGCCGGCTGCATACGTTTCGATTCGTTTCGATATTCGTTACGCGCA 179
*****

AGAP012483-RA      CGATCAAACGTGTGAACGATGCCGAGTGTGTCCGGCCATCGCGACTAGAAGCATAGCGGA 227
AGAP012762-RA      CGATCAAACGTGTGAACGATGCCGAGTGTGTCCGGCCATCGCGACTAGAAGCATAGCGGA 227
AGAP012700-RA      CGATCAAACGTGTGAACGATGCCGAGTGTGTCCGGCCATCGCGACTAGAAGCATAGCGGA 227
AGAP012752-RA      CGATCAAACGTGCGTAACGATGCCGAGTGTGTCCGGCCATCGCGACTAGAAGCATAGCGGA 228
AGAP001087-RA      CGATCAAACGTGTGAACGATGCCGAGTGTGTCCGGCCATCGCGACTAGAAGCATAGCAAA 239
*****

AGAP012483-RA      AGTTAAGTTGCGTCGTCCTATTGTGGTGCGATGCGCTGTATGTTCCGGGTGTGCGATTGAG 287
AGAP012762-RA      AGTTAAGTTGCGTCGTCCTATTGTGGTGCGATGCGCTGTATGTTCCGGGTGTGCGATTGAG 287
AGAP012700-RA      AGTTAAGTTGCGTCGTCCTATTGTGGTGCGATGCACTGTATGTTCCGGGTGTGCGATTGAG 287
AGAP012752-RA      AGTTAAGTTGCGTCGTCCTATTGTGGTGCGATGCACTGTATGTTCCGGGTGTGCGATTGAG 288
AGAP001087-RA      AGTTAAGTTGCGTCGTCCTATTGTGGTACGATGCGCTGTATGTTCCGGGTGTGCGATTGAG 299
*****

AGAP012483-RA      TTTTCATGTTTGTCTTTCTTTCTGTTTACAGACACCTTTTCATCAACAACCTGGCATGACTAT 347
AGAP012762-RA      TTTTCATGTTTGTCTTTCTTTCTGTTTACAGACACCTTTTCATCAACAACCTGGCATGACTAT 347
AGAP012700-RA      CTTTCATGTTTGTCTTTCTTTCTGTTTACAGACACCTTTTCATCAACAACCTGGCATGACTAT 347
AGAP012752-RA      CTTTCATGTTTGTCTTTCTTTCTGTTTACAGACACCTTTTCATCAACAACCTGGCATGACTAT 348
AGAP001087-RA      TTTTCATGTTTGTCTTTCTTTCTGTTTACAGACACCTTTTCATCAACAACCTGGCATGACTAT 359
*****

AGAP012483-RA      CGGCGCACGGTCGGTGGCTCTAGCGAAGGGGAGGGTGCGTTCCAATCGGCTGGCAGGACA 407
AGAP012762-RA      CGGCGCACGGTCGGTGGCTCTAGCGAAGGGGAGGGTGCGTTCCAATCGGCTGGCAGGACA 407
AGAP012700-RA      CGGCGCACGGTCGGTGGCTCTAGCGAAGGGGAGGGTGCGTTCCAATCGGCTGGCAGGACA 407
AGAP012752-RA      CGGCGCACGGTCGGTGGCTCTAGCGAAGGGGAGGGTGCGTTCCAATCGGCTGGCAGGACA 408
AGAP001087-RA      CGGCGCTCGTTCGGTGGCTCTAGCGAAGGGGAGGGTGCGTTCCAATCGGCTGGCAGGACA 419
*****

AGAP012483-RA      CAGATCGGATCGGTTAGGACAACGATCGGCATAGTACGGCTCGCGACCCGCATGTGGCTA 467
AGAP012762-RA      CAGATCGGATCGGTTAGGACAACGATCGGCATAGTACGGCTCGCGACCCGCATGTGGCTA 467
AGAP012700-RA      CAGATCGGATCGGTTAGGACAACGATCGGCATAGTACGGCTCGCGACCCGCATGTGGCTA 467
AGAP012752-RA      CAGATCGGATCGGTTAGGACAACGATCGGCATAGTACGGCTCGCGACCCGCATGTGGCTA 468
AGAP001087-RA      CAGATCGGATCGGTTAGAACAGCGATCGGCATAGTACGGCTCGCGACCCGCTTGTGGCTA 479
*****

AGAP012483-RA      TTTGTTGACTAGTTGCCTCTTCAAGTGCAAATCTACGAACATGTTTAGAAGATTGGCTC 527
AGAP012762-RA      TTTGTTGACTAGTTGCCTCTTCAAGTGCAAATCTACGAACATGTTTAGAAGATTGGCTC 527
AGAP012700-RA      TTTGTTGACTAGTTGCCTCTTCAAGTGCAAATCTACGAACATGTTTAGAAGATTGGCTC 527
AGAP012752-RA      TTTGTTGACTAGTTGCCTCTTCAAGTGCAAATCTACGAACATGTTTAGAAGATTGGCTC 528
AGAP001087-RA      TTTGTTGACTAGTTGCCTCTTCAAGTGCAAATCTACGAACATGTTTAGAAGACTTGGCTC 539
*****

AGAP012483-RA      TTTTCGGTCGCAACGTTTGCCGAGTCGCTGGGGATATTGGATTGTAAGGAATGAATATACT 587
AGAP012762-RA      TTTTCGGTCGCAACGTTTGCCGAGTCGCTGGGGATATTGGATTGTAAGGAATGAATATACT 587
AGAP012700-RA      TTTTCGGTCGCAACGTTTGCCGAGTCGCTGGGGATATTGGATTGTAAGGAATGAATATACT 587
AGAP012752-RA      TTTTCGGTCGCAACGTTTGCCGAGTCGCTGGGGATATTGGATTGTAAGGAATGAATATACT 588
AGAP001087-RA      TTTTCGGTCGCAACGTTTGCCGAGTCGCTGGGGATATTGGATTGTAAGGAATGAATATACT 599
*****

AGAP012483-RA      ATCCGCAGGAACCAGATGATGACATCACCAAGGAGCTAATGCGCTAAAGCTTATCAGAAG 647
AGAP012762-RA      ATCCGCAGGAACCAGATGATGACATCACCAAGGAGCTAATGCGCTAAAGCTTATCAGAAG 647
AGAP012700-RA      GTCCGCAGGAACCAGATGATGACATCACCAAGGAGCTAATGCGCTAAAGCTTATCAGGAG 647
AGAP012752-RA      GTCCGCAGGAACCAGATGATGACATCACCAAGGAGCTAATGCGCTAAAGCTTATCAGGAG 648
AGAP001087-RA      GTCCGCAGGAACCAGATGATGACATCACCAAGGAGCTAATGCGCTAAAGCTTATCAGGAG 659
*****
```

```

AGAP012483-RA      GAGGCGAGAATGGTTTGATGT 668
AGAP012762-RA      GAGGCGAGAATGGTTTGATGT 668
AGAP012700-RA      GAGGCGAGAATGGTTTGATGT 668
AGAP012752-RA      GAGGCGAGAATGGTTTGATGT 669
AGAP001087-RA      TAGGCGAGAATGGTTTGATGT 680
*****

```

Ping-pong network 2:  
Sequence Logo 3.5.0 ([toolshed.g2.bx.psu.edu/repos/devteam/weblogo3/rgweblogo3/3.5.0](http://toolshed.g2.bx.psu.edu/repos/devteam/weblogo3/rgweblogo3/3.5.0))

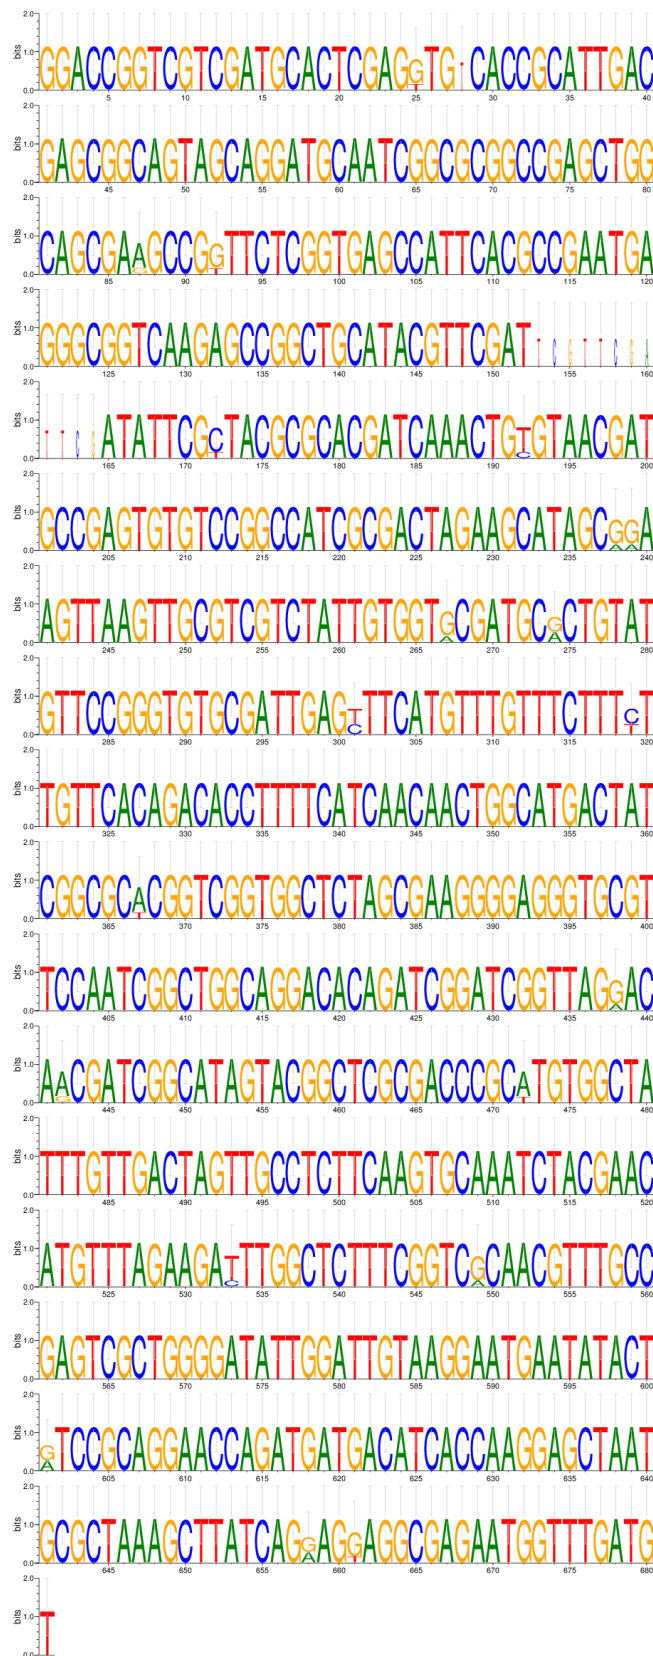

Ping-pong network 3:  
CLUSTAL 2.1 multiple sequence alignment

```
AGAP013070-RA -----
AGAP013323-RA -----
AGAP013502-RA -----
AGAP013002-RA -----
AGAP013534-RA -----
AGAP013334-RA -----
AGAP013312-RA TAGCTTTTGAATACAAACTGAAAAGGAAACACAAACCATCAAAAAGAAAAACGATTGGT 60
AGAP000976-RA -----

AGAP013070-RA -----
AGAP013323-RA -----
AGAP013502-RA -----
AGAP013002-RA -----
AGAP013534-RA -----
AGAP013334-RA -----
AGAP013312-RA GATATCACGAAAACCAACACACTGTGCATCAATCAGAAAGATCTCAACCACAACATATAA 120
AGAP000976-RA -----

AGAP013070-RA -----
AGAP013323-RA -----
AGAP013502-RA -----
AGAP013002-RA -----
AGAP013534-RA -----
AGAP013334-RA -----
AGAP013312-RA ACATCAACGAAACAGCAATATAAACATCAAAGGAGAATGGATGATTCCCTCCAAAAAC 180
AGAP000976-RA -----

AGAP013070-RA -----ATGT 4
AGAP013323-RA -----ATGT 4
AGAP013502-RA -----
AGAP013002-RA -----
AGAP013534-RA -----
AGAP013334-RA -----
AGAP013312-RA TGGTAGTCAAACCTCTGATTGTACCTTCAAAAACGGATGGTATAGGAGGCCTCAACCTAC 240
AGAP000976-RA -----

AGAP013070-RA CAAAAAGTTCGTCAAGCTTCGTGTGTGATGAAAGGCGACAAGAAAAGCAAGCAGCCGCAA 64
AGAP013323-RA CAAAAAGTTCGTCAAGCTTCGTGTGTGATGAAAGGCGACAAGAAAAGCAAGCAGCCGCAA 64
AGAP013502-RA -----CGTCAAGCTTCGTGTGTGATGAAAGGCGACAAGAAAAGCAAGCAGCCGCAA 51
AGAP013002-RA -----CGTCAAGCTTCGTGTGTGATGAAAGGCGACAAGAAAAGCAAGCAGCCGCAA 51
AGAP013534-RA -----CGTCAAGCTTCGTTCGTGTGATGAAAGGCCACAAGAAAAGCAAGCATCCGCAA 51
AGAP013334-RA -----CGTCAAGCTTCGTGTGTGATGAAAGGCGACAAGAAAAGCAAGCAGCCGCAA 51
AGAP013312-RA CAACCCCTATTAAGAAGAAGAAGTGTGATGAAAGGCGACAAGAAAAGCAAGCAGCCGCAA 300
AGAP000976-RA -----GGCGACAAGAAAAGCAAGCAGCCTCAA 27
                      *** ***** **

AGAP013070-RA ATTTTACAGCTTGTAATTTGTGTATTATCAAGCTTGTTACAACAGCATTTAAACTCGGTGG 124
AGAP013323-RA ATTTTACAGCTTGTAATTTGTGTATTATCAAGCTTGTTACAACAGCATTTAAACTCGGTGG 124
AGAP013502-RA ATTTTACAGCTTGTAATTTGTGTATTATCAAGCTTGTTACAACAGCATTTAAACTCGGTGG 111
AGAP013002-RA ATTTTACAGCTTCTAATTTGTATATTATCAAGCTTGTTACAACAGCATTTAAACTCGGTGG 111
AGAP013534-RA ATTTTACAGCTTCTAATTTGTATATTATCAAGCTTGTTACAACAGCATTTAAACTCGGTGG 111
AGAP013334-RA ATTTTACAGCTTGTAATTTGTATATTATCAAGCTTGTTACAACAGCATTTAAACTCGGTGG 111
AGAP013312-RA ATTTTACAGCTTGTAATTTGTGTATTATCAAGCTTGTTACAACAGCATTTAAACTCGGTGG 360
AGAP000976-RA ATTTAACAGCTTGTAATTTGTGTATTATCAAGCTTATACAACAGCATTTAAACTCGGTGG 87
                      ****

AGAP013070-RA TAGAGTTCCGCCCCTCCATCAAATACAGAGAATGACGCCGTCCAATATTGTTCTCGCCT 184
AGAP013323-RA TAGAGTTCCGCCCCTCCATCAAATACAGAGAATGACGCCGTCCAATATTGTTCTCGCCT 184
AGAP013502-RA TAGAGTTCCGCCCCTCCATCAAATACAGAGAATGACGCCGTCCAATATTGTTCTCGCCT 171
AGAP013002-RA TAGAGTTCCGCCCCTCCATCAAATACAGAGAATGACGCCGTCCAATATTGTTCTCGCCT 171
AGAP013534-RA TAGAGTTCCGCCCCTCCATCAAATACAGAGAATGACGCCGTCCAATATTGTTCTCGCCT 171
AGAP013334-RA TAGAGTTCCGCCCCTCCATCAAATACAGAGAATGACGCCGTCCAATATTGTTCTCGCCT 171
AGAP013312-RA TAGAGTTCCGCCCCTCCATCAAATACAGAGAATGACGCCGTCCAATATTGTTCTCGCCT 420
AGAP000976-RA TAGAGTTCCGCCCCTCCATCAAATGTAGAGAATGACGCTGTCCAATATTGTTCTCGCCT 147
                      *****

AGAP013070-RA CGCGGTCGTGCACTACCGTCAGCACTGCACTAGCCGCAACAAAACATGCGCCCCCTGTGCC 244
AGAP013323-RA CGCGGTCGTGCACTACCGTCAGCACTGCACTAGCCGCAACAAAACATGCGCCCCCTGTGCC 244
AGAP013502-RA CGCGGTCGTGCACTACCGTCAGCACTGCACTAGCCGCAACAAAACATGCGCCCCCTGTGCC 231
AGAP013002-RA CGCGGTCGTGCACTACCGTCAGCACTGCACTAGCCGCAACAAAACATGCAACCCCTGTGCC 231
AGAP013534-RA CGCGGTCGTGCACTACCGTCAGCACTGCACTAGCCGCAACAAAACATGCGCCCCCTGTGCC 231
AGAP013334-RA CGCGGTCGTGCACTACCGTCAGCACTGCACTAGCCGCAACAAAACATGCGCCCCCTGTGCC 231
AGAP013312-RA CGCGGTCGTGCACTACCGTCAGCACTGCACTAGCCGCAACAAAACATGCGCCCCCTGTGCC 480
AGAP000976-RA CGCGGTCGTGCACTACCGTCAGCACTGCAATAGCCGCAAGCAACAAAACATGCGCCCCATGTCC 207
                      *****
```

AGAP013070-RA CACATTTCCATAATCTCGACGGTGGTCAACAGCTGTACGACGGCCGCTACAGCCACCGG 304  
 AGAP013323-RA CACATTTCCATAATCTCGACGGTGGTCAACAGCTGTACGACGGCCGCTACAGCCACCGG 304  
 AGAP013502-RA CACATTTCCATAATCTCGACGGTGGTCAACAGCTGTACGACGGCCGCTACAGCCACCGG 291  
 AGAP013002-RA CACATTTCCATAATCTCGACGGTGGTCAACAGCTGTACGACGGCCGCTACAGCCACCGG 291  
 AGAP013534-RA CACATTTCCATAATCTCGACGGTGGTCAACAGCTGTACGACGGCCGCTACAGCCACCGG 291  
 AGAP013334-RA CACATTTCCATAATCTCGACGGTGGTCAACAGCTGTACGACGGCCGCTACAGCCACCGG 291  
 AGAP013312-RA CACATTTCCATAATCTCGACGGTGGTCAACAGCTGTACGACGGCCGCTACAGCCACCGG 540  
 AGAP000976-RA CACATTTCCATCATCTCGACGGTGCTCAACAGCTGTACGCCTGCTGCCTACAGCCACCGG 267  
 \*\*\*\*\*

AGAP013070-RA GATAGCCTCGCTCTCTAGTGCATACTGATGAACCTGCGGCGCAAGAGCACGCAAGCGTT 364  
 AGAP013323-RA GATAGCCTCGCTCTCTAGTGCATACTGATGAACCTGCGGCGCAAGAGCACGCAAGCGTT 364  
 AGAP013502-RA GATAGCCTCGCTCTCTAGTGCATACTGATGAACCTGCGGCGCAAGAGCACGCAAGCGTT 351  
 AGAP013002-RA GATAGCCTCGCTCTCTAGTGCATACTGATGAACCTGCGGCGCAAGAGCACGCAAGCGTT 351  
 AGAP013534-RA GATAGCCTCGCTCTCTAGTGCATACTGATGAACCTGCGGCGCAAGAGCACGCAAGCGTT 351  
 AGAP013334-RA GATAGCCTCGCTCTCTAGTGCATACTGATGAACCTGCGGCGCAAGAGCACGCAAGCGTT 351  
 AGAP013312-RA GATAGCCTCGCTCTCTAGTGCATACTGATGAACCTGCGGCGCAAGAGCACGCAAGCGTT 600  
 AGAP000976-RA GATAGCCTCGCTCTCTAGTGTGATACTGACGAACCTGCGGCGCAAGAGCACGTAAGCGTT 327  
 \*\*\*\*\*

AGAP013070-RA TGGTGGCGGCGGCTGTGGAATGATGGTGCACCTCGGTAAATATGGTGCACGAGAAGAATT 424  
 AGAP013323-RA TGGTGGCGGCGGCTGTGGAATGATGGTGCACCTCGGTAAATATGGTGCACGAGAAGAATT 424  
 AGAP013502-RA TGGTGGCGGCGGCTGTGGAATGATGGTGCACCTCGGTAAATATGGTGCACGAGAAGAATT 411  
 AGAP013002-RA TGGTGGCGGCGGCTGTGGAATGATGGTGCACCTCGGTAAATATGGTGCACGAGAAGAATT 411  
 AGAP013534-RA TGGTGGCGGCGGCTGTGGAATGATGGTGCACCTCGGTAAATATGGTGCACGAGAAGAATT 411  
 AGAP013334-RA TGGTGGCGGCGGCTGTGGAATGATGGTGCACCTCGGTAAATATGGTGCACGAGAAGAATT 411  
 AGAP013312-RA TGGTGGCGGCGGCTGTGGAATGATGGTGCACCTCAGTAAATATGGTGCACGAGAAGAATT 660  
 AGAP000976-RA TGGTGGCGGCGGCTGTGGAATGATGGTGCACCTCGGTAAATATGGTGCACGAGAAGAATT 387  
 \*\*\*\*\*

AGAP013070-RA CTTCCCGCAAAAGGCATCCCTTTTTTGGGCACTGAAATCGAACGACGCCTACGGAGACAGT 484  
 AGAP013323-RA CTTCCCGCAAAAGGCATCCCTTTT--GGGCACTGAAATCGAACGACGCCTACGGAGACAGT 482  
 AGAP013502-RA CTTCCCGCAAAAGGCATCCGTTT--GGGCACTGAAATCGAACGACGCCTACGGAGACAGT 469  
 AGAP013002-RA CTTCCCGCAAAAGGCATCCGCTT--GGGCACTGAAATCGAACGACGCCTACGGAGACAGT 469  
 AGAP013534-RA CTTCCCGCAAAAGGCATCCGCTT--GGGCACTGAAATCGAACGACGCCTACGGAGACAGT 469  
 AGAP013334-RA CTTCCCGCAAAAGGCATCCGCTT--GGGCACTGAAATCGAACGACGCCTACGGAGACAGT 469  
 AGAP013312-RA CTTCTGCAAAAGGCATTCGCTT--GGGCACTGAAATCGAACGACGCCTACGGAGACAGT 718  
 AGAP000976-RA CTTCCCGCAAAAGGCATCCGTTT--GGGCACTGAAATCGAACGACGCTCTACGGAGACAGT 445  
 \*\*\*\*\*

AGAP013070-RA AACAAACAACCAATCCGGACAGGAGACGGATCTCAGTCGGTTGTATGAAAACAGCA--- 541  
 AGAP013323-RA AACAAACAACCAATCCGGACAGGAGACGGATCTCAGTCGGTTGTATGAAAACAGCA--- 539  
 AGAP013502-RA AACAAACAACCAATCCGGACAGGAGACGGATCTCAGTCGGTTGTATGATAACAGCA--- 526  
 AGAP013002-RA AACAAACAACCAATCCGGACAGGAGACGGATCTCAGTCGGTTGTATGAAAACAGCA--- 526  
 AGAP013534-RA AACAAACAACCAATCCGGACAGGAGACGGATCTCAGTCGGTTGTATGAAAACAGCA--- 526  
 AGAP013334-RA AACAAACAACCAATCCGGACAGGAGACGGATCTCAGTCGGTTGTATGAAAACAGCA--- 526  
 AGAP013312-RA AACAAACAACCAATCCGGACAGGAGACGGATCTCAGTCGGTTGTATGAAAACAGCA--- 775  
 AGAP000976-RA AACAAACAACCAATCCGGACAGGAGGTGGATCTCAGTCGGTTGTATGAAAACAGCATCA 505  
 \*\*\*\*\*

AGAP013070-RA AGGTGCACTAGATCGTGAAACACTGGCCGTCCAGTACGACACAGGCCTTATCAGCAGATG 601  
 AGAP013323-RA AGGTGCACTAGATCGTGAAACACTGGCCGTCCAGTACGACACAGGCCTTATCAGCAGATG 599  
 AGAP013502-RA AGGTGCACTAGATCGTGAAACACTGGCCGTCCAGTACGACACAGGCCTTATCAGCAGATG 586  
 AGAP013002-RA AGGTGCACTAGATCGTGAAACACTGGCCGTCCAGTACGACACAGGCCTTATCAGCAGATA 586  
 AGAP013534-RA AGGTGCACTAGATCGTGAAACACTGGCCGTCCAGTACGACACAGGCCTTATCAGCAGATA 586  
 AGAP013334-RA AGGTGCACTAGATCGTGAAACACTGGCCGTCCAGTACGACACAGGCCTTATCAGCAGATA 586  
 AGAP013312-RA AGGTGCACTAGATCGTGAAACACTGGCCGTCCAGTACGACACAGGCCTTATCAGCAGATA 835  
 AGAP000976-RA AGGTGCAACAGATCGCGAAACACGGCCGTCCAGTACGACACAGGCCTTATCGGCAG--- 562  
 \*\*\*\*\*

AGAP013070-RA GCATGGAATGCCGCGTACAATGAGGCCGCACCGTGACGCCCCGCGCTGTAGCCCTCGTT 661  
 AGAP013323-RA GCATGGAATGCCGCGTACAATGAGGCCGCACCGTGACGCCCCGCGCTGTAGCCCTCGTT 659  
 AGAP013502-RA GCATGGAATGCCGCGTACAATGAGGCCGCACCGTGACGCCCCGCGCTGTAGCCCTCGTT 646  
 AGAP013002-RA GCATGGAATGCCGCGTACAATGAGGCCGCACCGTGACGCCCCGCGCTGTAGCCCTCGTT 646  
 AGAP013534-RA GCATGGAATGCCGCGTACAATGAGGCCGCACCGTGACGCCCCGCGCTGTAGCCCTCGTT 646  
 AGAP013334-RA GCATGGAATGCCGCGTACAATGAGGCCGCACCGTGACGCCCCGCGCTGTAGCCCTCGTT 646  
 AGAP013312-RA GCATGGAATGCCGCGTACAATGAGGCCGCACCGTGACGCCCCGCGCTGTAGCCCTCGTT 895  
 AGAP000976-RA -CCTGGAG--GCCTTAT----TGGAGTCCCGCC--TTATGTCCTG--CCGTAGGATCCCAAC 612  
 \* \*\*\*\* \* \* \* \* \* \* \* \* \* \*

AGAP013070-RA TACGCACCGAAGTTAAGCAGTTCCATCGGGATGTCTTACCGCGCCGGATCATTTGCGGG 721  
 AGAP013323-RA TACGCACCGAAGTTAAGCAGTTCCATCGGGATGTCTTACCGCGCCGGATCATTTGCGGG 719  
 AGAP013502-RA TACGCACCGAAGTTAAGCAGTTCCATCGGGATGTCTTACCGCGCCGGATCATTTGCGGTG 706  
 AGAP013002-RA TACGCACCGAAGTTAAGCAGTTCCATCGGGATGTCTTACCGCGCCGGATCATTTGCGGG 706  
 AGAP013534-RA TACGCACCGAAGTTAAGCAGTTCCATCGGGATGTCTTACCGCGCCGGATCATTTGCGGG 706  
 AGAP013334-RA TACGCACCGAAGTTAAGCAGTTCCATCGGGATGTCTTACCGCGCCGGATCATTTGCGGG 706  
 AGAP013312-RA TACGCACCGAAGTTAAGCAGTTCCATCGGGATGTCTTACCGCGCCGGATCATTTGCGGG 955  
 AGAP000976-RA CAA----- 615  
 \*

|               |                                                              |      |
|---------------|--------------------------------------------------------------|------|
| AGAP013070-RA | ACGATACCCA-----                                              | 731  |
| AGAP013323-RA | ACGATAGCGACAAATGTCCCGCCGTAGGATCCAACCAATATGGTGGATAGTTAATATAAA | 779  |
| AGAP013502-RA | ACGATAGCGACAAATGTCCCGCCGTAGGATCCAACCAATATAGTGGATAATTAATATAAA | 766  |
| AGAP013002-RA | ACGATAGCGACAAATGTCCCGCCGTAGGATCCAACCAATATGGTGGATAATTAATATAAA | 766  |
| AGAP013534-RA | ACGATAGCGACAAATGTCCCGCCGTAGGATCCAACCAATATGGTGGATAATTAATATAAA | 766  |
| AGAP013334-RA | ACGATAGCGACAAATGTCCCGCCGTAGGATCCAACCAATATGGTGGATAATTAATATAAA | 766  |
| AGAP013312-RA | ACGATAGCGACAAATGTCCCGCCGTAGGATCCAACCAATATGGTGGATAATTAATATAAA | 1015 |
| AGAP000976-RA | -----                                                        |      |

|               |                       |      |
|---------------|-----------------------|------|
| AGAP013070-RA | -----                 |      |
| AGAP013323-RA | AAATACAAATTACATTAATTT | 800  |
| AGAP013502-RA | AAATACAAATTACATTAATTT | 787  |
| AGAP013002-RA | AAATACAAATTACATTAATTT | 787  |
| AGAP013534-RA | AAATACAAATTACATTAATTT | 787  |
| AGAP013334-RA | AAATACAAATTACATTAATTT | 787  |
| AGAP013312-RA | AAATACAAATTTCAATAATTT | 1036 |
| AGAP000976-RA | -----                 |      |

Ping-pong network 3:

Sequence Logo 3.5.0 ([toolshed.g2.bx.psu.edu/repos/devteam/weblogo3/rgweblogo3/3.5.0](http://toolshed.g2.bx.psu.edu/repos/devteam/weblogo3/rgweblogo3/3.5.0))

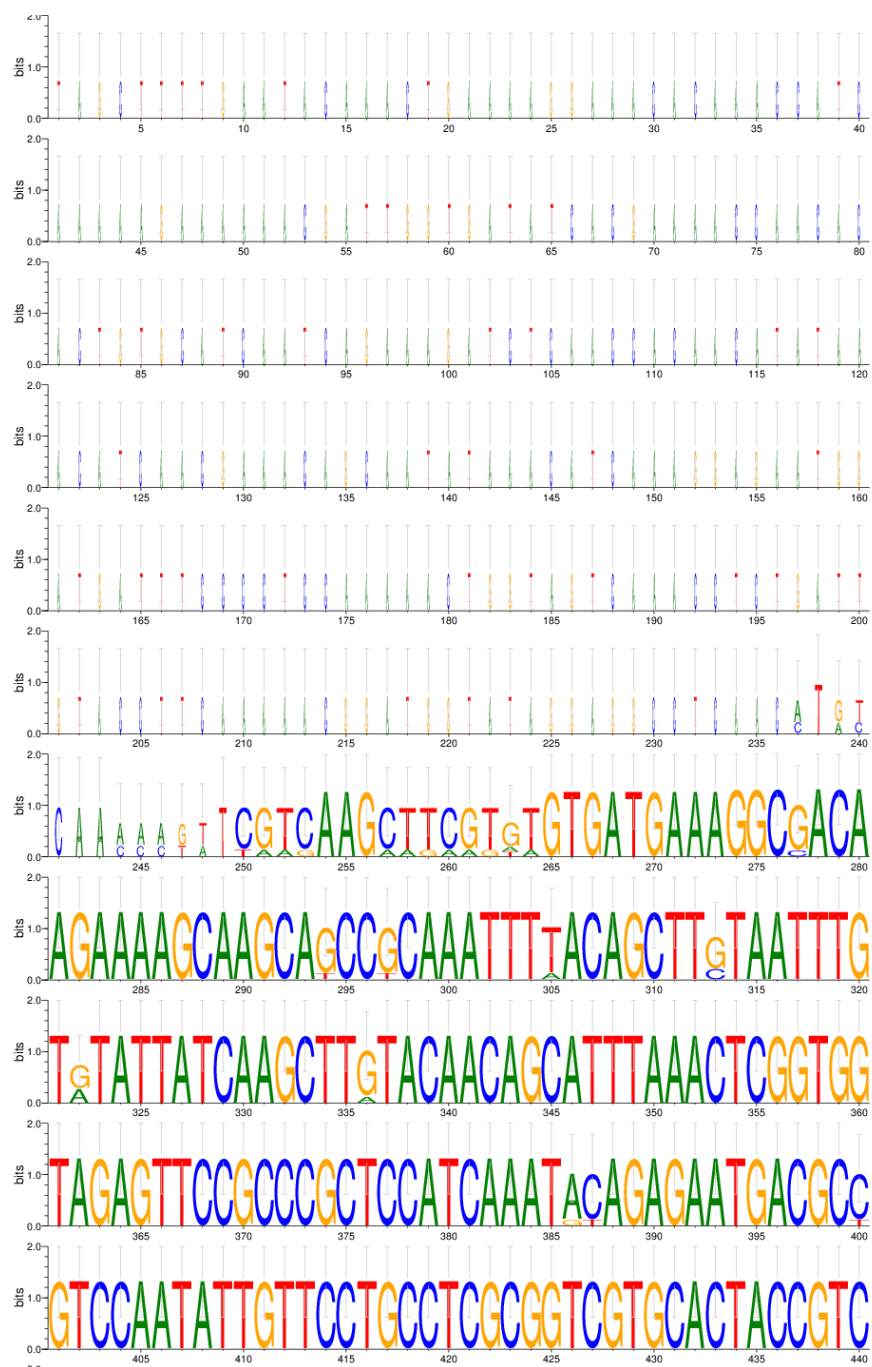

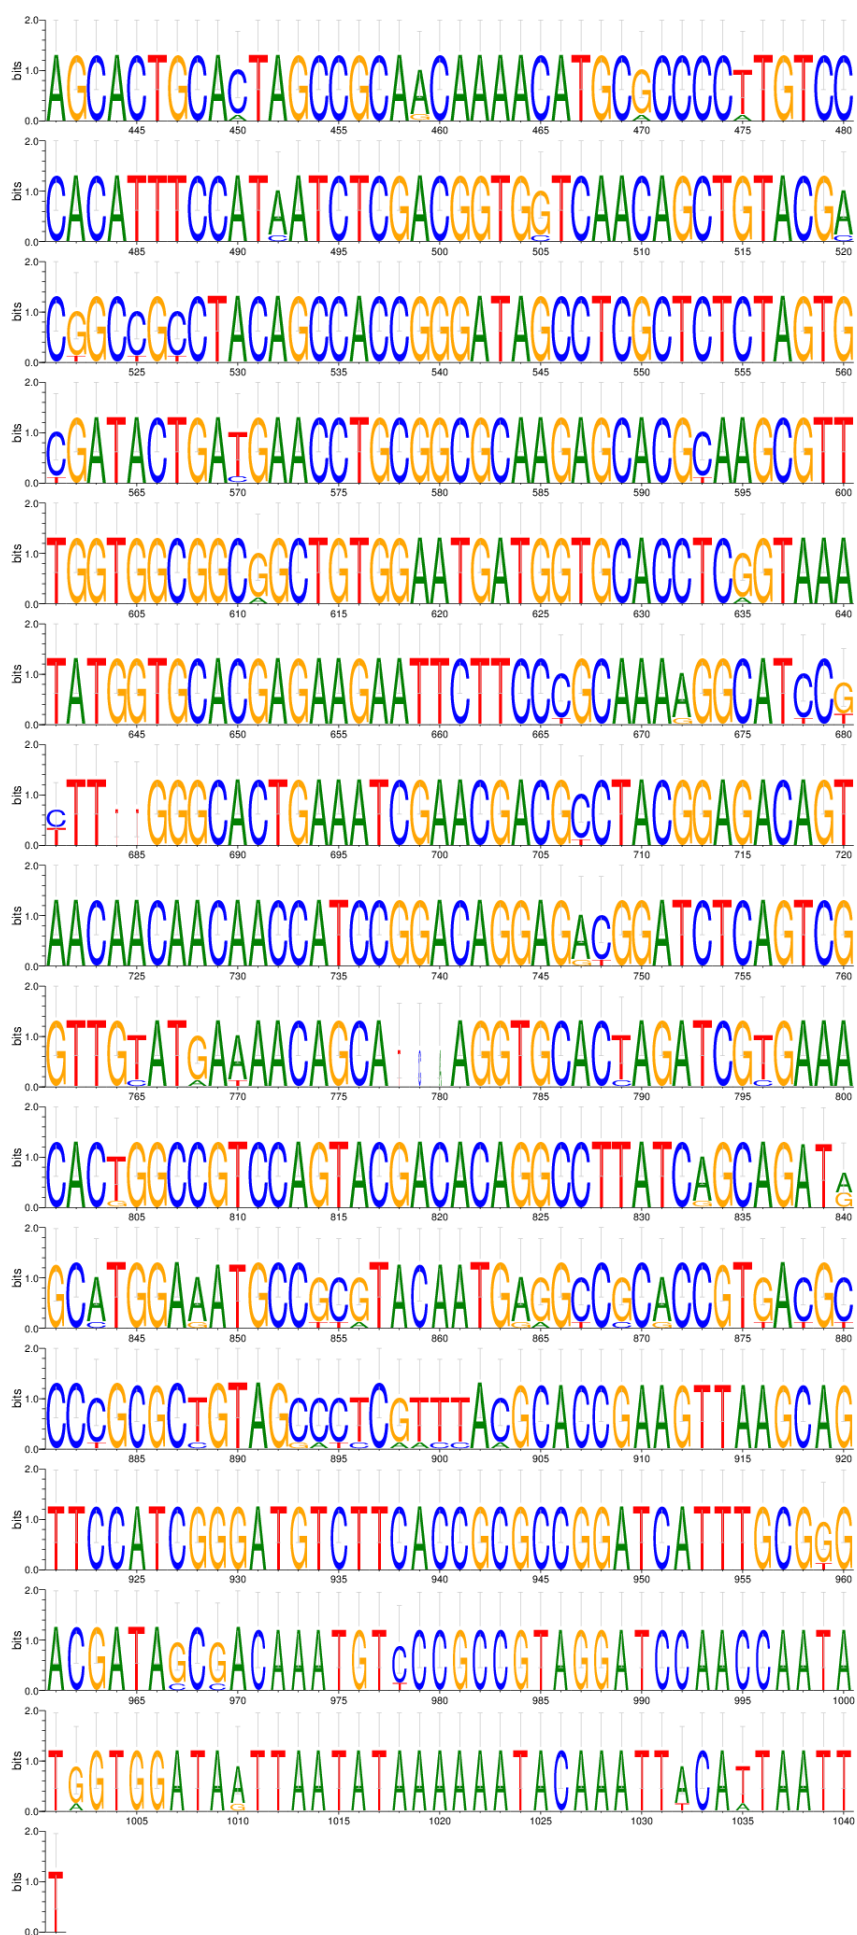

Ping-pong network 4:  
CLUSTAL 2.1 multiple sequence alignment

```
AGAP012506-RA      TGATTTCTTTTGCCTCGAACTTAAAGTTGTTTTCTTATTGTTTTGCATAAAACCAAGT  60
AGAP012538-RA      TGATTTCTTTTGCCTCGAACTTAAAGTTGTTTTCTTATTGTTTTGCATAAAACCAAGT  60
AGAP011660-RA      TGATTTCTTTTGCCTCGAACTTAAAGTTGCTTTTTTTATTGTTTTGCATAAAACCAAGT  60
AGAP012490-RA      TGATTTCTTTTGCCTCGAACTTAAAGTTGTTTTTTATTGTTTTGCATAAAACCAAGT  60
*****

AGAP012506-RA      GAAATGGATCCTTCCAAACGCTTGAAGAAAAGTGGAGTGGCGAGCAAGCGTGCCAAATAG  120
AGAP012538-RA      GAAATGGATCCTTCCAAACGCTTGAAGAAAAGTGGAGTGGCGAGCAAGCGTGCCAA-AG  119
AGAP011660-RA      GAAATGGATACGTCCAAACGTTTGAAGAAAAGTGGAGTGGCGAGCAAGCGTTCCAA-AG  119
AGAP012490-RA      GAAATGGATACGTCTAAACGTTTGAAGAAAAGTGGAGTGGCGAGCAAGCGTACCAA-AG  119
*****

AGAP012506-RA      CACATTTGGGAGCGCTTTGAAAAGGAATGGGAAGAGGAAAATCTTCCGGGAACAAGCAGC  180
AGAP012538-RA      CA-ATTTGGGAGCGCTTTGAAAAGGAATGGGAAGAGGAAAATCTTCCGGGAACAAGCAGC  178
AGAP011660-RA      CA-ATTTGGGAGCGCTTTGAAAAGGAATGGGAAGAGGAAAATCTTCCGGGAACAAGCAGC  178
AGAP012490-RA      CA-ATTTGGGAGCGCTTTGAAAAGGAATGGGAAGAGGAAAATCTTCCGGGAACAAGCAGC  178
*****

AGAP012506-RA      GGTGTCGATCAACAAGCATCATCATACGGGAATGTGCAGCCGGATGCCGTGGAAGTTGCC  240
AGAP012538-RA      GGTGTCGATCAACAAGCATCATCATACGGGAATGTGCAGCCGGATGCCGTGGAAGTTGCC  238
AGAP011660-RA      GGTGTCGATCAACAAGCTTCATCATACGGGAATGTGCAGCCGGATGCCGTGGAAGTTGCC  238
AGAP012490-RA      GATGTCGATCAACAAGCTTCATCATACGGGAATGTGCAGCCGGATGCCGTGGAAGTTGCC  238
*****

AGAP012506-RA      GATATGCCCTTGGAATCAGAAGCAGCGGATTACGTTTCTGATGACGATGAAGACGCTGAT  300
AGAP012538-RA      GATATGCCCTTGGAATCAGAAGCAGCGGATTACGTTTCTGATGACGATGAAGACGCTGAT  298
AGAP011660-RA      GATATACCCATGGAATCAGAAGCAGCGGATTACGTTTCTGATGACGATGAAGACGCTGAT  298
AGAP012490-RA      GATATACCCATGGAATCAGAAGCAGCGGATTACGTTTCTGATGACGATGAAGACGCTGAT  298
*****

AGAP012506-RA      TGCTCGGTGTTGGAAGACGATTGGAGTGAAGGCGTATTGGAGGACGAAGTCAATGAGGAT  360
AGAP012538-RA      TGCTCGGTGTTGGAAGACGATTGGAGTGAAGGCGTATTGGAGGACGAAGTCAATGAGGAT  358
AGAP011660-RA      TGCTCGGTGTTGGAAGACGATTGGAGTGAAGGCGAATTGGAGGACGAAGTCAATGAGGAT  358
AGAP012490-RA      TGCTCGGTGTTGGAAGACGATTGGAGTGAAGGCGAATTGGAGGACGAAGTCAATGAGGAT  358
*****

AGAP012506-RA      GAGTATTTTGATGCTGATGAAGCCCCGAAGGCAATGCTTATGCTAGCAGGCTTAGGATA  420
AGAP012538-RA      GAGTATTTTGATGCTGATGAAGCCCCGAAGGCAATGCTTATGCTAGCAGGCTTAGGATA  418
AGAP011660-RA      GAGTATTTTGATGCTGATGAAGCCCCGAAGGCAATGCTTATGCTAGCAGGCTTAGGATA  418
AGAP012490-RA      GAGTATTTTGATGCTGATGAAGCCCCGAAGGCAATGCTTATGCTAGCAGGCTTAGGATA  418
*****

AGAP012506-RA      TGGGCTTTAACTCATAAAATAACGCATTCTGCATTGAGTGATTTGCTGGTGTGACTCGT  480
AGAP012538-RA      TGGGCTTTAACTCATAAAATAACGCATTCTGCATTGAGTGATTTGCTGGTGTGACTCGT  478
AGAP011660-RA      TGGGCTTTAACTCATAAAATAACGCATTCTGCATTGAGTGATTTGCTGGTGTGACTCGT  478
AGAP012490-RA      TGGGCTTTAACTCATAAAATAACGCATTCTGCATTGAGTGATTTGCTGGTGTGACTCGT  478
*****

AGAP012506-RA      GAAACTACCAATATTTCTCTTCTAGGTGTGCAAAGACGCTACTGAAGACTCCGAAACAG  540
AGAP012538-RA      GAAACTACCAATATTTCTCTTCTAGGTGTGCAAAGACGCTACTGAAGACTCCGAAACAG  538
AGAP011660-RA      GAAACTACCAATATTTCTCTTCTAGGTGTGCAAAGACGTTACTGAAGACTCCGAAACAG  538
AGAP012490-RA      GAAACTACCAATATTTCTCTTCTAGGTGTGCAAAGACGTTACTGAAGACTCCGAAACAG  538
*****

AGAP012506-RA      GTGGAGAGACATTTTACGGCCGTTGGAGAAGGGCAGCTTTGGTACCAAGGAATACAAAGC  600
AGAP012538-RA      GTGGAGAGACATTTTACGGCCGTTGGAGAAGGGCAGCTTTGGTACCAAGGAATACAAAGC  598
AGAP011660-RA      GTGGAGAGACATTTTACGGCCGTTGGAGAAGGGCAGCTTTGGTACCAAGGAATACAAAGC  598
AGAP012490-RA      GTGGAGAGACATTTTACGGCCGTTGGAGAAGGGCAGCTTTGGTACCAAGGAATACAAAGC  598
*****

AGAP012506-RA      ACTCTCCAACAATATTATCGATCTGTACCACCAGTCATCAGATTGATAGAAGCTGATATC  660
AGAP012538-RA      ACTCTCCAACAATATTATCGATCTGTACCACCAGTCATCAGATTGATAGAAGCTGATATC  658
AGAP011660-RA      ACTCTCCAACAATATTATCGATCTGTACCACCAGTCATCAGATTGATAGAAGCTAATATC  658
AGAP012490-RA      ACTCTCCAACAATATTATCGATCTGTACCACCAGTCATCAGATTGATAGAAGCTAATATC  658
*****

AGAP012506-RA      GCGGTAGATGGACTTCCGATGCATAATAGTGGACCAACGCAGCTATGGCCTATATTAATG  720
AGAP012538-RA      GCGGTAGATGGACTTCCGATGCATAATAGTGGACCAACGCAGCTATGGCCTATATTAATG  718
AGAP011660-RA      GCGGTAGATGGACTTCCGATGCATAATAGTGGACCAACGCAGCTATGGCCTATATTAATG  718
AGAP012490-RA      GCGGTAGATGGACTTCCGATGCATAATAGTGGACCAACGCAGCTATGGCCTATATTAATG  718
*****

AGAP012506-RA      CACATAGTTAATCTACCAGCACTGCCAATCATG  753
AGAP012538-RA      CACATAGTTAATCTACCAGCACTGCCAATCATG  751
AGAP011660-RA      CACATAGTTAATCTACCAGCACTGCCAATCATG  751
AGAP012490-RA      CACATAGTTAATCTACCAGCACTGCCAATCATG  751
*****
```



# Ping-pong network 4:

Sequence Logo 3.5.0 (toolshed.g2.bx.psu.edu/repos/devteam/weblogo3/rgweblogo3/3.5.0)

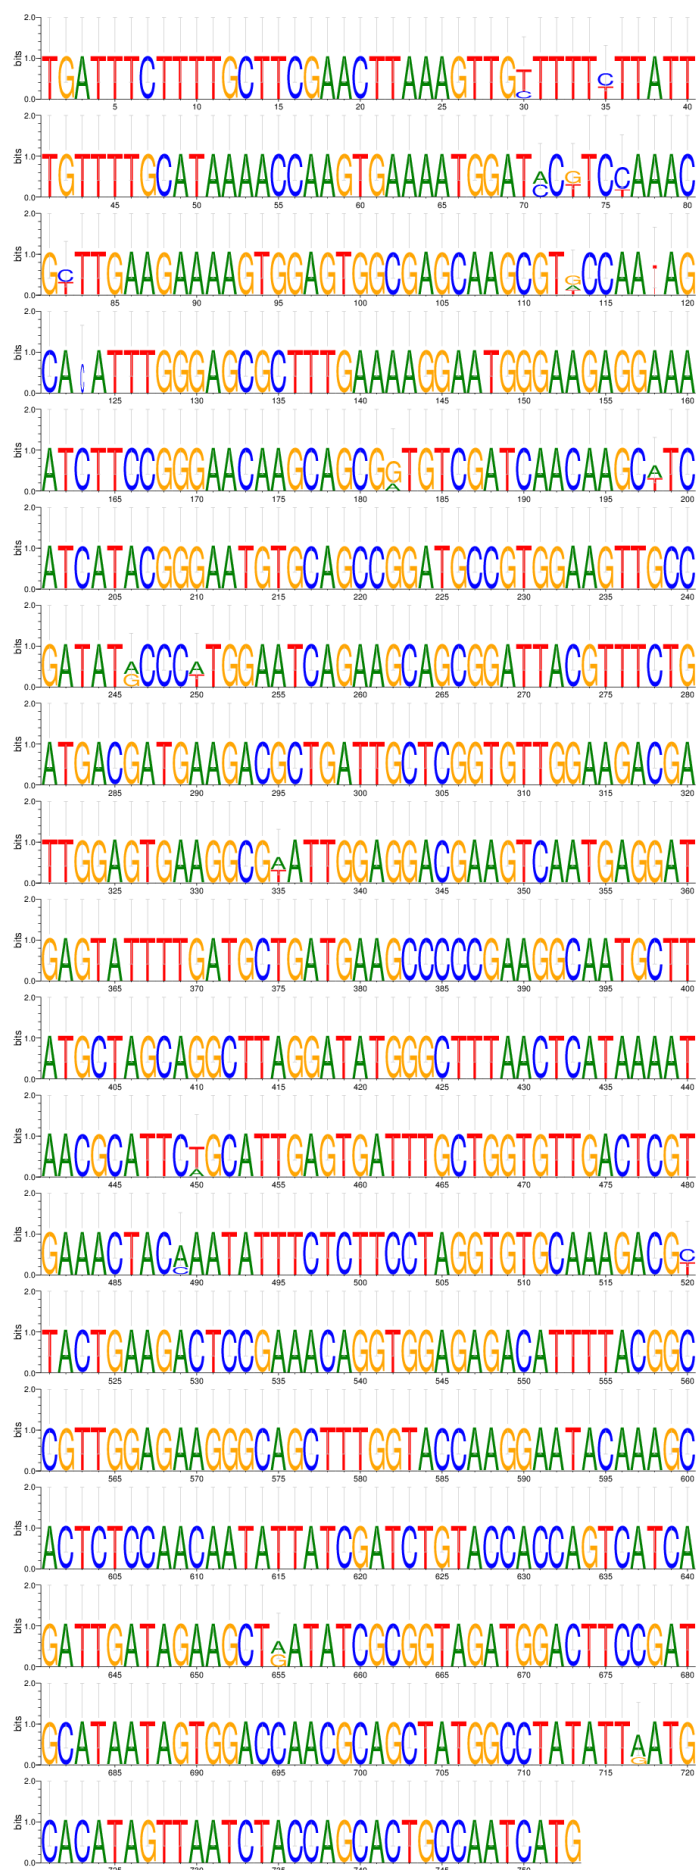

Ping-pong network 5:  
 CLUSTAL O(1.2.4) multiple sequence alignment (<https://www.ebi.ac.uk/Tools/msa/clustalo/>)

|               |                                                                 |     |
|---------------|-----------------------------------------------------------------|-----|
| AGAP013064-RA | -----                                                           | 0   |
| AGAP001078-RA | CGATCTGAATGATGCGAAACAACAAGAAACAAATTAAGTTAACATTTTCCGTAAATTTAA    | 60  |
| AGAP001079-RA | CGATCTGAATGATGCGAAACACCAAGAAACAAATTAAGTTAACATTTTCCGTAAATTTAA    | 60  |
| AGAP004894-RA | CGATCTGAATGATGCGAAACAACAAGAAGGAAATTAAGTTAACATTTTCCGTAAATTTAA    | 60  |
| AGAP012776-RA | ----CTGAATGATGCGAAACAACAAGAAGGAAATTAAGTTAACATTTTCCGTAAATTTAA    | 56  |
| AGAP013064-RA | -----                                                           | 0   |
| AGAP001078-RA | GATAAAATCATTGTTTCAGTGATTTGTGATCACATAAATTATTCATCGCGCAATATCTGTA   | 120 |
| AGAP001079-RA | GATAAAATCATTGTTTCAGTGATTTGTGATCACATAAATTATTCATCGCGCAATATCTGTA   | 120 |
| AGAP004894-RA | GATAAAATCATTGTTTCAGTGATTTGTGATTACATAAATTATTCATCGCGCAATATCTGTA   | 120 |
| AGAP012776-RA | GATAAAATCATTGTTTCAGTGATTTGTGATCACATAAATTATTCATCGCGCAATATCTGTA   | 116 |
| AGAP013064-RA | -----                                                           | 0   |
| AGAP001078-RA | CTATTACAATCTAATGTTTCGTGGCTCATTTTATCATCTGGAAAGTGGTGCCTCCTAGACT   | 180 |
| AGAP001079-RA | CTATTACAATCTAATGTTTCGTGGCTCATTTTATCATCTGGAAAGTGGTGCCTCCTAGACT   | 180 |
| AGAP004894-RA | CTATTACAATCTAATGTTTCGTGGCTCATTTTATCATCTGGAAAGTGGTACCTCCTAGACT   | 180 |
| AGAP012776-RA | CTATTACAATCTAATGTTTCGTGGCTCATTTTATCATCTGGAAAGTGGTGCCTCCTAGACT   | 176 |
| AGAP013064-RA | -----                                                           | 0   |
| AGAP001078-RA | AGACCGTATATATCAAACCAATTTCGATGAAATTGAATAAACGCGCCAACAGTGAGTTTG    | 240 |
| AGAP001079-RA | AGACCGTATATATCAAACCAATTTCGATGAAATTGAATAAACGCGCCAACAGTGAGTTTG    | 240 |
| AGAP004894-RA | AGACCGTATATATCAAACCAATTTCGATGAAATTGAATAAACGCGCCAACAGTGAGTTTG    | 240 |
| AGAP012776-RA | AGACCGTATATATCGAACCAATTTCGATGAAATTGAATAA-----                   | 216 |
| AGAP013064-RA | -----                                                           | 0   |
| AGAP001078-RA | GTCACCCGTCCTAATTATATGTAGCCATTTGATTGTGGTTTCCGTGTCGGATGGTGGCAT    | 300 |
| AGAP001079-RA | GTCACCCGTCCTAATTATATGTAGCCATTTGATTGTGGTTTCCGTGTCGGATGGTGGCAT    | 300 |
| AGAP004894-RA | GTCACCCGTCCTAATTATATGTAGCCATTTGGTTGTGGTTTCCGTGTCGGATGGTGGTAT    | 300 |
| AGAP012776-RA | -----                                                           | 216 |
| AGAP013064-RA | ATGATTCTCGTACACACGGCGGAAGCAAAATCACTTGTTATGATTCTATTATTTGGCGCT    | 60  |
| AGAP001078-RA | ATGATTCTTGTACACATGGCGGAAGCAAAATCACTTGTTATGATTCTATTATTTGGCGCT    | 360 |
| AGAP001079-RA | ATGATTCTTGTACACATGGCGGAAGCAAAATCACTTGTTATGATTCTATTATTTGGCGCT    | 360 |
| AGAP004894-RA | ATGATTCTTGTACACATGGCGGAAGCAAAATCACTTGTTATGATTCTATTATTTGGCGCT    | 360 |
| AGAP012776-RA | -----                                                           | 216 |
| AGAP013064-RA | TCCAGATTTTCATCCATCCAGATCCAGAGAAACATTACAGAACCAACGTGATTTAGTTTTT   | 120 |
| AGAP001078-RA | TCCAGATTTTCATCCATCCAGATCCAGAAAAACATTACAGAACCAACGTGATTTAGTTTTT   | 420 |
| AGAP001079-RA | TCCAGATTTTCATCCATCCAGATCCAGAAAAACATTACAGAACCAACGTGATTTAGTTTTT   | 420 |
| AGAP004894-RA | TCCAGATTTTCATCCATCCAGATCCAGAAAAACATTACAGAACCAACGTGATTTAGTTTTT   | 420 |
| AGAP012776-RA | -----                                                           | 216 |
| AGAP013064-RA | GAGCTAGCGTTATATACAATTCCGGAAGTGATGTTTTTCGACGTACCGTCCGAACACTACTCA | 180 |
| AGAP001078-RA | GAGCTAGCGTTATATACAATTCCGGAAGTGATGTTTTTCGACGTACGGGTCCGAACACTACTC | 480 |
| AGAP001079-RA | GAGCTAGCGTTATATACAATTCCGGAAGTGATGTTTTTCGACGTACGGGTCCGAACACTACTC | 480 |
| AGAP004894-RA | GAGCTAGCGTTATATACAATTCCGGAAGTGATGTTTTTCGACGTAG-GGTCCGAACACTACTC | 479 |
| AGAP012776-RA | -----                                                           | 216 |
| AGAP013064-RA | ATCCTGATAAAGGGCTGTATAAGCGAATTACACTACTCTTACAAGCTGAACCAAACATAT    | 240 |
| AGAP001078-RA | AATCCTGATATGGGTTGTATAAGCGAATTACACTACTCTTACAAGCTGAACCAAACATAT    | 540 |
| AGAP001079-RA | AATCCTGATATGGGTTGTATAAGCGAATTACACTACTCTTACAAGCTGAACCAAACATAT    | 540 |
| AGAP004894-RA | AATCCTGATATGAGTTGCATAAGCGAATTACACTACTCTTATAAGCTGAACCAAACATAT    | 539 |
| AGAP012776-RA | -----                                                           | 216 |
| AGAP013064-RA | TTTATAAACATTATTTCGTGCGACTTAA-----                               | 267 |
| AGAP001078-RA | TTTATAAACATTATTTCGTGCGACTTAATGCAAAAATAGAAATAGCTACAGTTAGTGAGTGA  | 600 |
| AGAP001079-RA | TTTATAAACATTATTTCGTGCGACTTAATGCAAAAATAGAAATAGCTACAGTTAGTGAGTGA  | 600 |
| AGAP004894-RA | TTTATAAACATTATTTCGTGCGACTTAATGCAAAAATAGAACAGCTACAGTTAGTGAGTGA   | 599 |
| AGAP012776-RA | -----                                                           | 216 |
| AGAP013064-RA | -----                                                           | 267 |
| AGAP001078-RA | AACGATATCACTATCAACAGTTTAATCATCTCTTAAACATTTAAAGGAAATTCTACAT      | 660 |
| AGAP001079-RA | AACGATATCACTATCAACAGTTTAATCATCTCTTAAACATTTAAAGGAAATTCTACAT      | 660 |
| AGAP004894-RA | AACGATATCACTATCAACAGTTTAATCATCTCTTAAACATTTAAAGGAAATTGTACAT      | 659 |
| AGAP012776-RA | -----                                                           | 216 |

|               |         |     |
|---------------|---------|-----|
| AGAP013064-RA | -----   | 267 |
| AGAP001078-RA | TAATTAG | 727 |
| AGAP001079-RA | TAATTAG | 727 |
| AGAP004894-RA | TAATTAG | 726 |
| AGAP012776-RA | -----   | 216 |

Ping-pong network 6:  
CLUSTAL 2.1 multiple sequence alignment

```
AGAP012621-RA      TACCTGCAACAGTAGGGTTACCAAGTAATAATCTTTATTAGCTTTCTAGACTCCATGACG  60
AGAP012622-RA      TACCTGCAACAGTAGGGTTACCAAGTAATAATCTTTATTAGCTTTCTAGACTCCATGACG  60
*****

AGAP012621-RA      GTTTTATGTGTTTGCAGAAAGTGAAGTAATAGAAAATGTTATTTTAAAGTATTGAAAC  120
AGAP012622-RA      GCTTTATGTGTTTGCAGAAAGTGAAGTAATAGAAAATGTTATTTTAAAGTATTGAAAC  120
* *****

AGAP012621-RA      ATCCTTTAGCGCGCGGGATGGTTACGTATCCGCTTATGGCCACAGCCAATTTAGTGC  180
AGAP012622-RA      ATCCTTTAGCGCGCGGGATGGTTACATATCCGCTTATGGCCACAGCCAATTTAGTGC  180
*****

AGAP012621-RA      AGCAAAGTTTGGATGGACGAAGCTATGATGCTTTAGACTTTGTTTCAGAGTTTGAGGTATG  240
AGAP012622-RA      AGCAAAGTTTGGATGGACGAAGCTATGATGCTTTAGACTTTGTTTCAGAGTTTGAGGTATG  240
*****

AGAP012621-RA      GATTATACGGTACATTTTACGTTGCCCGACGATCTATGGATGGGTAAAGATAACCAGCA  300
AGAP012622-RA      GATTATACGGTACATTTTACGTTGCCCGACGATCTATGGATGGGTAAAGATAACCAGCA  300
*****

AGAP012621-RA      TCATGTGGCCAAAAATTAATT-ACGTAAC TGCCATGATCAAAGCTATTATCGAGCAAGCT  359
AGAP012622-RA      TCATGTGGCCAAAAATTAATTACGTA-CTGCCATGATCAAAGCTATTATCGAGCAAGCT  359
*****

AGAP012621-RA      ACATATGGGCCATTTGCTGGCATTAGTTTTTTATATATTATGTCATTGACCGAAGGAAAG  419
AGAP012622-RA      ACATATGGGCCATTTGCTGGCATTAGTTTTTTATATATTATGTCATTGACCGAAGGAAAG  419
*****

AGAP012621-RA      ACAGCTGTAGAAGCAGTAAAAGAAGTAAATTTGAAATTTCCCTACTACATATACACCCATA  479
AGAP012622-RA      ACAGCTGTAGAAGCAGTAAAAGAAGTAAATTTGAAATTTCCCTACTACATATACA---GTA  476
*****

AGAP012621-RA      GGTCTTGCAATTTTGGCCTTTTATTCAAACAATCAATTTTGCTTGTATACCCGAACGGAAT  539
AGAP012622-RA      GGTCTTGCAATTTTGGCCTTTTATTCAAACAATCAATTTTGCTTGTATACCCGAACGGAAT  536
*****

AGAP012621-RA      CGTGTGCCATTTGTTGCAACCTGCAGTTTCGTATGGACAGTTTTTCTAGCTTCTATCAAA  599
AGAP012622-RA      CGTGTGCTATTTGTTGCAACCTGCAGTTTCGTATGGACAGTTTTTCTAGCTTCTATCAAA  596
*****

AGAP012621-RA      AATAACTGTATTTTCAATCAAACTAA-----  626
AGAP012622-RA      AATAACTGTATTTTCAATCAAACTAAACATCTGACGAAATAAACAGAACTGCAACGTAGC  656
*****

AGAP012621-RA      --
AGAP012622-RA      AA  658
```

# Ping-pong network 6:

Sequence Logo 3.5.0 (toolshed.g2.bx.psu.edu/repos/devteam/weblogo3/rgweblogo3/3.5.0)

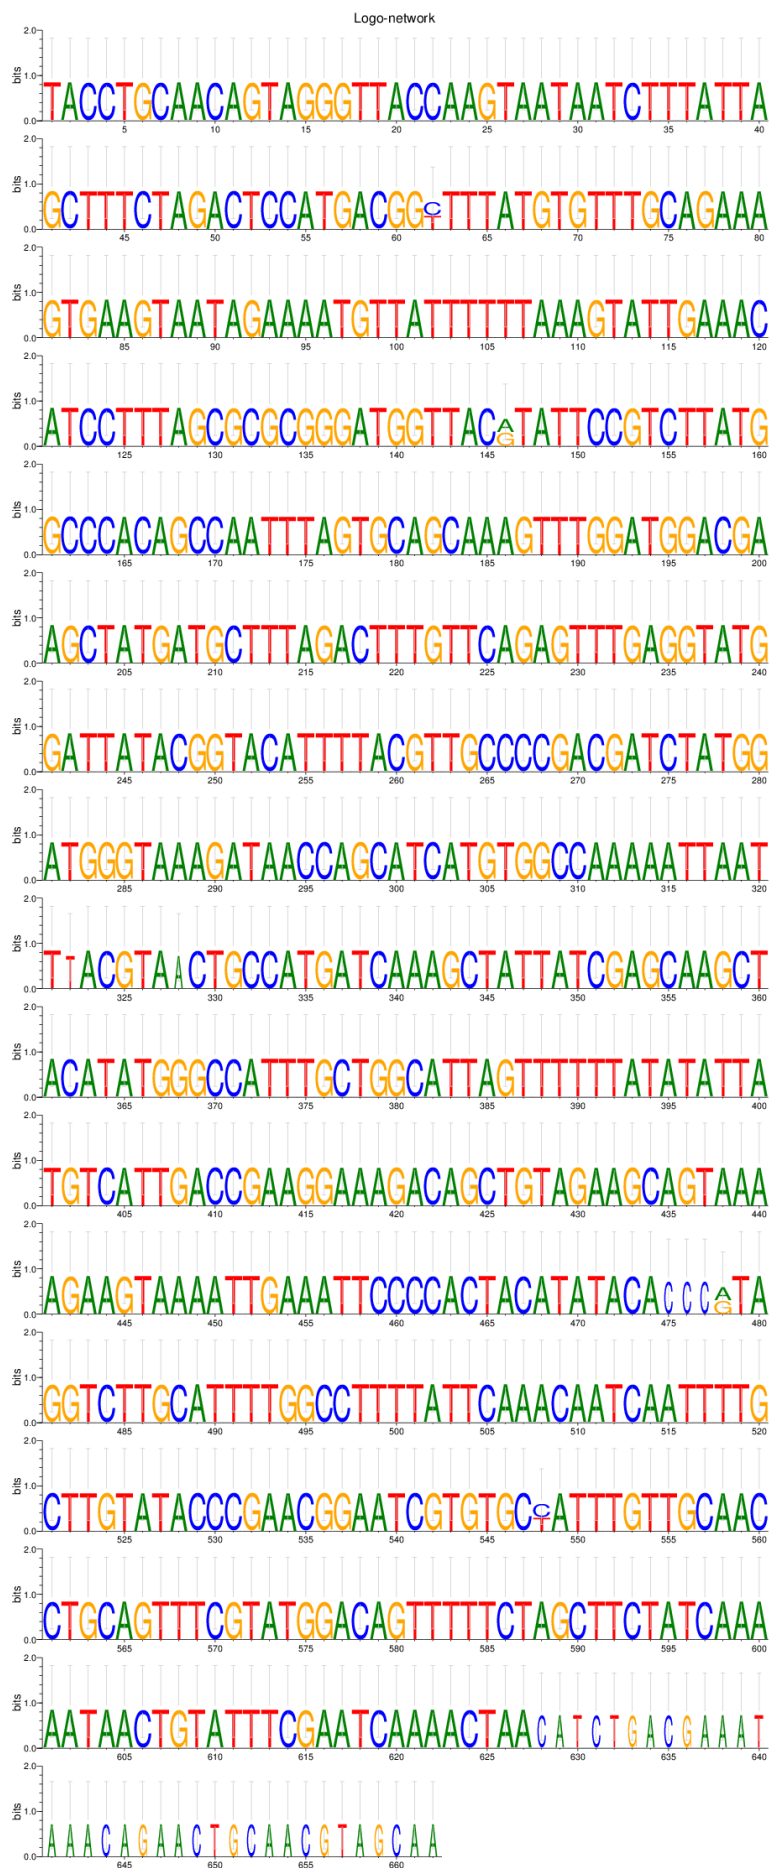

Ping-pong network 7:  
CLUSTAL 2.1 multiple sequence alignment

```
AGAP000408-RA      ATGGATAATTTACAGCGTCTGGACAACATCAAGTATTCGGAACAAATTAGAAAGACTGGA  60
AGAP007639-RA      ATGGATAATTTACAGCGTCTGGACAACATCAAGTATTCGGAACAAATTAGAAAGACTGGA  60
AGAP003624-RA      ATGGATAATTTACAGCGTCTGGACAACATCAAGTATTCGGAACAAATTAGAAAGACTGGA  60
*****

AGAP000408-RA      ATGCTCTATAAGCAAAGGGATAAAATTGAGGCTAATTGAGAAAGACGCAGCAGATCATGGA  120
AGAP007639-RA      ATGCTCTATAAGCAAAGGGATAAAATTGAGGCTAATTGAGAAAGACGCAGCAGATCATGGA  120
AGAP003624-RA      ATGCTCTATAAGCAAAGGGATAAAATTGAGGCTAATTGAGAAAGACGCAGCAGATCATGGA  120
*****

AGAP000408-RA      TCAACGTCAGTTGATGACGCTGGATATTCGAATATATCTCATGCGGATTGCAGCATAGCT  180
AGAP007639-RA      TCAACGTCAGTTGATGACGCTGGATATTCGAATATATCTCATGCGGATTGCAGCATAGCT  180
AGAP003624-RA      TCAACGTCAGTTGATGACGCTGGATATTCGAATATATCTCATGCGGATTGCAGCATAGCT  180
*****

AGAP000408-RA      GATCAGAGTGATAATATTGTATCCGATGAATCGACTGTATCCATCGAAGATTTTTTGGAA  240
AGAP007639-RA      GATCAGAGTGATAATATTGTATCCGATGAATCGACTGTATCCATCGAAGATTTTTTGGAA  240
AGAP003624-RA      GATCAGAGTGATAATATTGTATCCGATGAATCGACTGTATCCATCGAAGATTTTTTGGAA  240
*****

AGAP000408-RA      GATGAATCGGAAGAAGAGGTTAGTGGAGACAGTGATGCTGAAGAAGGAGATACCGAACGC  300
AGAP007639-RA      GATGAATCGGAAGAAGAGGTTAGTGGAGACAGTGATGCTGAAGAAGGAGATACCGAACGC  300
AGAP003624-RA      GATGAATCGGAAGAAGAGGTTAGTGGAGACAGTGATGCTGAAGAAGGAGATACCGAACGC  300
*****

AGAP000408-RA      TGTTCATCAAGTTTGCCGTTTGCTGATCGTATAAGAGGATGGGCATTGAAAGCAAATCTT  360
AGAP007639-RA      TGTTCATCAAGTTTGCCGTTTGCTGATCGTATAAGAGGATGGGCATTGAAAGCAAATCTT  360
AGAP003624-RA      TGTTCATCAAGTTTGCCGTTTGCTGATCGTATAAGAGGATGGGCATTGAAAGCAAATCTT  360
*****

AGAP000408-RA      TCACACTACAGCCTCAATCAGCTTCTGCAAATTATTAATACGTCAAAGGTCGATAAACTA  420
AGAP007639-RA      TCACACTACAGCCTCAATCAGCTTCTGCAAATTATTAATACGTCAAAGGTCGATAAACTA  420
AGAP003624-RA      TCACACTACAGCCTCAATCAGCTTCTGCAAATTATTAATACGTCAAAGGTCGATAAACTA  420
*****

AGAP000408-RA      CCCAAGGATGCCAGAACGTTGCTTAAACAAATAGGGAGCGTGTAAGAGTAGATAAAATA  480
AGAP007639-RA      CCCAAGGATGCCAGAACGTTGCTTAAACAAATAGGGAGCGTGTAAGAGTAGATAAAATA  480
AGAP003624-RA      CCCAAGGATGCCAGAACGTTGCTTAAACAAATAGGGAGCGTGTAAGAGTAGATAAAATA  480
*****

AGAP000408-RA      GCAGGAGGAAAATATTGGTATAATGGAATACAACAGTGTTTTTCCAACAGTTTTTAAAAAT  540
AGAP007639-RA      GCAGGAGGAAAATATTGGTATAATGGAATACAACAGTGTTTTTCCAACAGTTTTTAAAAAT  540
AGAP003624-RA      GCAGGAGGAAAATATTGGTATAATGGAATACAACAGTGTTTTTCCAACAGTTTTTAAAAAT  540
*****

AGAP000408-RA      CAAAGCATTCATTTGGACTCGATATTGATAAACATATCAATCGATGGGCTCCCTCTGTAT  600
AGAP007639-RA      CAAAGCATTCATTTGGACTCGATATTGATAAACATATCAATCGATGGGCTCCCTCTGTAT  600
AGAP003624-RA      CAAAGCATTCATTTGGACTCGATATTGATAAACATATCAATCGATGGGCTCCCTCTGTAT  600
*****

AGAP000408-RA      AAGAGTAGCCCTACTCAATTTTGCCCTATATTGATGAATATACATGAATTGCCAGACATC  660
AGAP007639-RA      AAGAGTAGCCCTACTCAATTTTGCCCTATATTGATGAATATACATGAATTGCCAGACATC  660
AGAP003624-RA      AAGAGTAGCCCTACTCAATTTTGCCCTATATTGATGAATATACATGAATTGCCAGACATC  660
*****

AGAP000408-RA      CCAGTGATGATCGTGGCTATTTTTTGTGGTTCTTCAAAGCCAGGCAGTATAGAAGAATTT  720
AGAP007639-RA      CCAGTGATGATCGTGGCTATTTTTTGTGGTTCTTCAAAGCCAGGCAGTATAGAAGAATTT  720
AGAP003624-RA      CCAGTGATGATCGTGGCTATTTTTTGTGGTTCTTCAAAGCCAGGCAGTATAGAAGAATTT  720
*****

AGAP000408-RA      TTAAATCCTTTTGTGTAAGACATTAACAAAGTCCAAGAAGATGGAATAATGATAAATGGA  780
AGAP007639-RA      TTAAATCCTTTTGTGTAAGACATTAACAAAGTCCAAGAAGATGGAATAATGATAAATGGA  780
AGAP003624-RA      TTAAATCCTTTTGTGTAAGACATTAACAAAGTCCAAGAAGATGGAATAATGATAAATGGA  780
*****

AGAP000408-RA      AAAAAAATAAAAGTAAACACGAGCAATATCGCTGATTCTCCGGCTCGTGCCTTTATT  840
AGAP007639-RA      AAAAAAATAAAAGTAAACACGAGCAATATCGCTGATTCTCCGGCTCGTGCCTTTATT  840
AGAP003624-RA      AAAAAAATAAAAGTAAACACGAGCAATATCGCTGATTCTCCGGCTCGTGCCTTTATT  840
*****

AGAP000408-RA      AAAGGTAAGTTACAACATCCTTTCCATGATAAATGCTAA-----  879
AGAP007639-RA      AAAGGTAAGTTACAACATCCTTTCCATGATAAATGCTAACTAACTATTTTGTTTTATTGCA  900
AGAP003624-RA      AAAGGTAAGTTACAACATCCTTTCCATGATAAATGCTAA-----  879
*****

AGAP000408-RA      -----
AGAP007639-RA      GGAGTAGCTTATTTCAATGCCAAGCATGGTTGTTTAAAAATGTACATGCCATGGAGAATTT  960
AGAP003624-RA      -----
```

AGAP000408-RA  
AGAP007639-RA  
AGAP003624-RA

-----  
AGTGAGCTATCGAAAACCG 979  
-----

Ping-pong network 7:

Sequence Logo 3.5.0 ([toolshed.g2.bx.psu.edu/repos/devteam/weblogo3/rgweblogo3/3.5.0](http://toolshed.g2.bx.psu.edu/repos/devteam/weblogo3/rgweblogo3/3.5.0))

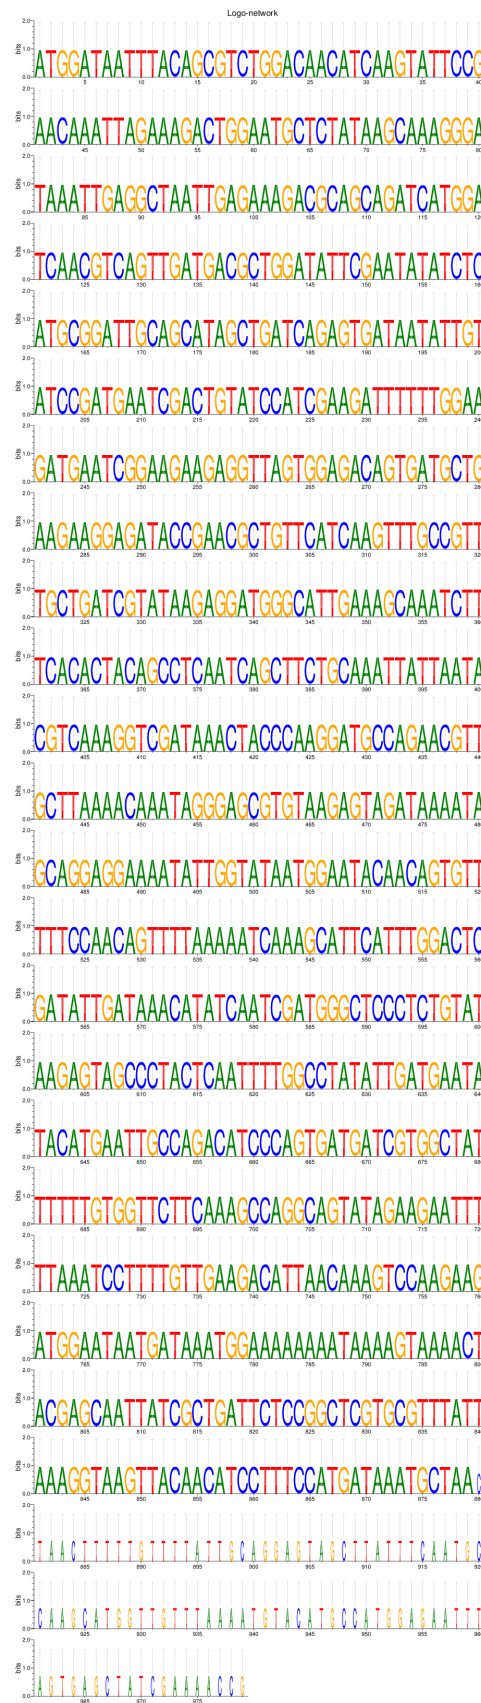



Ping-pong network 8:  
CLUSTAL 2.1 multiple sequence alignment

```
AGAP001072-RA      AATGCTAACTCGTTATATCATTTATAGAATATGACTTCTATGTAGGATTGGTTAATGCTG  60
AGAP010287-RA      AATGCTAACTCGTTATATCATTTATAGAATATGACTTCTATGTGTTGGATTGGTTAATGCTG  60
*****

AGAP001072-RA      AGTTTGATATTGCAGTCCCAGCTTCAGTGGACGAGGGTTCATGCCGCCAGCAGCAGCAG  120
AGAP010287-RA      AGTTTGGTATTGCAGTCCCAGCTTCAGTGGACGAGGGTTCATGCCGCCAGCAGCAGCAG  120
*****

AGAP001072-RA      TGTCCAAACTGGGTATTCCAGATGCTGCCCTCGTGTGGGAAGTGCCAGATCCCATGT  180
AGAP010287-RA      TGTCCAAACTGGGTATTCCAGATGCTGCCCTCGTGTGGGAAGTGCCAGATCCCATGT  180
*****

AGAP001072-RA      TGCTTCGCGCATAACAGCTCGTCCTTTATTCGGAGTGGAACGGACACGGAATAATTCAGT  240
AGAP010287-RA      TGCTTTCGCGCATAACAGCTCGTCCTTTATTCGGAGTGGAACGGACACGGAATAATTCAGT  240
*****

AGAP001072-RA      GAAAGAGTATCGATGTGATGACACCCTTTGGACGATGTTGGTCAGGGAACCTGTGATGAT  300
AGAP010287-RA      GAAAGAGTATCGATGTGATGACACCCTTTGGACTATGTTGGTCAGGGAACCTGTGATGAT  300
*****

AGAP001072-RA      GTGGTGCAAAAAAATGCTACCGGCATCACTTTCGTTCCGCTATTGCAC TTGACCCGAGC  360
AGAP010287-RA      GTGGTGCAAAAAA-TGCTACCGGCATCACTTTCGTTCCGCTATTGCAC TTGACCCGAGC  359
*****

AGAP001072-RA      TAGGACCGCGACGGCGCTGACGAAC TTGCGGCAGCGGGGATGATGCGAATCCCTCCTTCG  420
AGAP010287-RA      TAGGACCGCGACGGCGCTGACGAAC TTGCGGCAGCAGGGGTGATGCGAATCCCTCCTTCG  419
*****

AGAP001072-RA      AAATTGCGGTGCTGAGATGATGATAAAGTAGAAGCTTGTGTGGCATGGTCTCGTCCTTAC  480
AGAP010287-RA      AAATTGCGGTGCTGAGATGATGATAAAGTAGAAGCTTGTGTGGCATGGTCTCGTCCTTAC  479
*****

AGAP001072-RA      TCAAACACTGCTTAAGCTACACCCAAGGTGACATGAATCATCGACCCCCACAGGAATAAG  540
AGAP010287-RA      TAAACACTGCTTAAGCTACACCCAAGGTGACATGAATCATCGACCCCCACAGGAATAAG  539
*

AGAP001072-RA      GCTGCAGCCAGAACGGAATGAACATTTGTTTCTTTGAACTGGAACGGCAACAGTGGCAG  600
AGAP010287-RA      GCTGCAGCCAGAACGGAATGAACATTTGTTTCTTTGAACTGGAACGGCAACAGTGGCAG  599
*****

AGAP001072-RA      CATAGACGATCGTCTCGAACACGACGACTGCAACGAACCGACATGGAACCGCGGACAATA  660
AGAP010287-RA      CATAGACGTTCTGCTCGAACACGACGACTGCAACGAACCGACATGGAACCGCGGACAATA  659
*****

AGAP001072-RA      ACTTAAATAACCACTATGCATAAGCACAAATATACTTATGGTTTATTTTCCT  711
AGAP010287-RA      ACTTAAATAACCACTATGCATAAGCACAAATATACTTATGGTTTATTTTCCT  710
*****
```

# Ping-pong network 8:

Sequence Logo 3.5.0 (toolshed.g2.bx.psu.edu/repos/devteam/weblogo3/rgweblogo3/3.5.0)

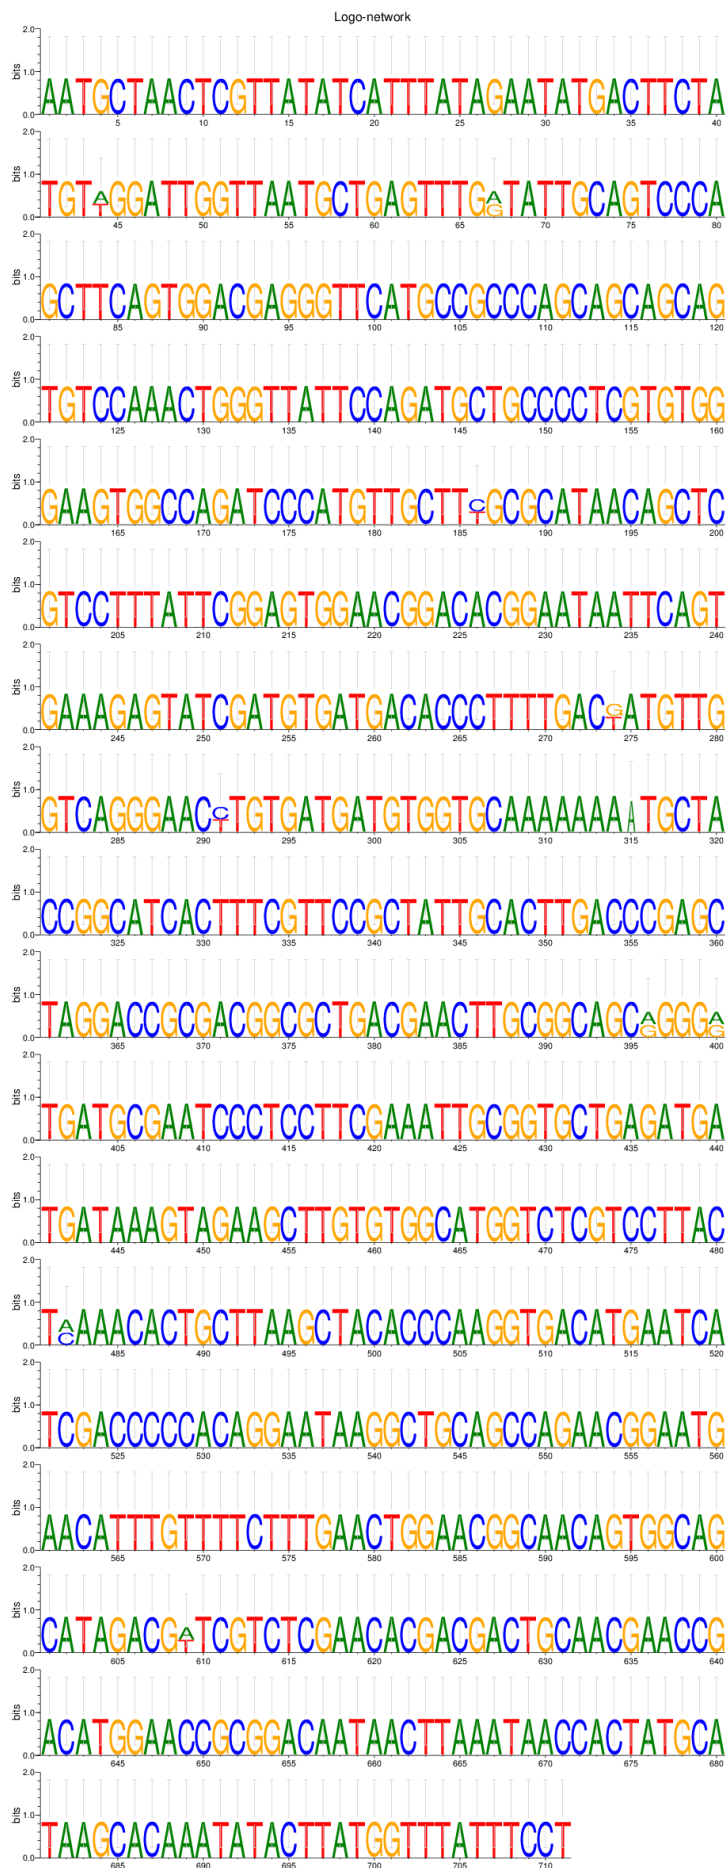

Ping-pong network 9:  
 CLUSTAL 2.1 multiple sequence alignment

|               |                                                               |      |
|---------------|---------------------------------------------------------------|------|
| AGAP007075-RA | CACTTTCATAGAGCAGGTTGCTCTTCCCTCACCTCAACCGGAATCCTTTGAAGAGATA    | 60   |
| AGAP012821-RA | -----                                                         |      |
| AGAP007075-RA | GATCGATCCTGCTTGCTGTGATGGATTCCGTGCTCGTAGGGCTGCTGCTATTCACCTGCA  | 120  |
| AGAP012821-RA | -----                                                         |      |
| AGAP007075-RA | TCACTTTTGCCCATCCCCAGCAGCAGCATTCGGTCCGTCCATCTTTATTTACGATGATT   | 180  |
| AGAP012821-RA | -----                                                         |      |
| AGAP007075-RA | TTGAGCGGTGTGAAGCGACCGCATCGGTGTACTGCTATGCACGCACCATACTGCGTGTGCG | 240  |
| AGAP012821-RA | -----                                                         |      |
| AGAP007075-RA | ATCAATTTCCGGCCGGATTTCGTAGTGCCACAAACGGAAAGCACGGATCGAATTGTCCACA | 300  |
| AGAP012821-RA | -----                                                         |      |
| AGAP007075-RA | AGCATCGGGCGCAGTACCTAGAGCTGGGTATCTGTTTGCGGGACTGTGAGCAGGAAGTGA  | 360  |
| AGAP012821-RA | -----                                                         |      |
| AGAP007075-RA | AAAGCTTAAGTGCAGCCACCAGGAAGACACTCTTCCAGCCAGAAATTCCTGTGAATTTTA  | 420  |
| AGAP012821-RA | -----                                                         |      |
| AGAP007075-RA | CTTTCCTAATTCCGAATGAGCTGTTTCCCACGATGCCGGCCGATAAGCGTCGCTACGAAA  | 480  |
| AGAP012821-RA | -----                                                         |      |
| AGAP007075-RA | CGCTGGTGAATGTGTGCGTAAATCAGCGGCTGCGCACGCGTTACAACATTACCGGTTACA  | 540  |
| AGAP012821-RA | -----                                                         |      |
| AGAP007075-RA | CGGCCCTCGAGTACTGTGCGACCCAAGCCCAAACAAACGGCCCGCCCTACGATGCATTGG  | 600  |
| AGAP012821-RA | -----                                                         |      |
| AGAP007075-RA | AGGTGATCTTCTTGCCGCTCTCGGGACGCTTGTCAGTACGCTCATCCTCACCACGCTGC   | 660  |
| AGAP012821-RA | -----                                                         |      |
| AGAP007075-RA | TGGACGTTTGTGCGGTTAACCAAGAAAATGCAATCGTCTCCGCTTCTCCGTGCGCCGCA   | 720  |
| AGAP012821-RA | -----                                                         |      |
| AGAP007075-RA | ATTGGATGCGCCTGCGGGCCGATGCCGATTCGCCCTGCACCGCGATCTGTTGTACATCG   | 780  |
| AGAP012821-RA | -----                                                         |      |
| AGAP007075-RA | ATGGGCTGCGCGTGCTCGTCAACCATCTGGTGATTGTGCTGCACAGCTTCTGATCGCGA   | 840  |
| AGAP012821-RA | -----                                                         |      |
| AGAP007075-RA | GCGTTGCCCCGGCTCAGAACTACAGCGAGCTGGAGGACCTGGCGAACAATGTGCCGATGC  | 900  |
| AGAP012821-RA | -----                                                         |      |
| AGAP007075-RA | GCATCTACCTCTCCTCGAACGCGTACCTGGTGCAGATCTTCTTCACGATCGGTGGCTATC  | 960  |
| AGAP012821-RA | -----                                                         |      |
| AGAP007075-RA | TGCTGAGCGTTAACTTTCTGCGCGATGCCGACCGCGGCCCGATCGATGCGCGTTACGCCG  | 1020 |
| AGAP012821-RA | -----                                                         |      |
| AGAP007075-RA | GCAACAAGATTCTCAACCGGCTGGTGCGCCTGGTGCCCGTGTATGCGTTCTTCTACTGT   | 1080 |
| AGAP012821-RA | -----                                                         |      |
| AGAP007075-RA | TCTCCGTTAGCCTTAACGTACGCTTCGATGTGAATGTGAACGGGTTTCGGCTGTTTACGG  | 1140 |
| AGAP012821-RA | -----                                                         |      |
| AGAP007075-RA | CAGAGAATGCCATTTGCCGTCAGAATTGGTGGACCAATGTGTTGTTTGTGAATAATTTTC  | 1200 |
| AGAP012821-RA | -----                                                         |      |

|               |                                                               |      |
|---------------|---------------------------------------------------------------|------|
| AGAP007075-RA | TGTGGCCAAAGGAGCTTTGTTTGATGCACACCTGGTACTTGGCGGCTGATTGCAACTGT   | 1260 |
| AGAP012821-RA | -----                                                         |      |
| AGAP007075-RA | TCCTAATGGCGATGGGTGTGCTGGTGCTGGTGCACCGGAGGCCAAAGAGTGTAGGGGTAG  | 1320 |
| AGAP012821-RA | -----ATGGCGATGGGTGTGCTGGTGCTGGTGCACCGAAGGCCAAGAGTGTGGGGTAG    | 55   |
|               | *****                                                         |      |
| AGAP007075-RA | TGTTTTTGGTTCGGAGTGGTAGTATCGTTTGCTGTTCCCGGTATATAACGCACCAGCATA  | 1380 |
| AGAP012821-RA | TGTTTTTGGTTCGGAGTGGTAGTATCGTTTGCTGTTCCCGGTATATAACGCACCAGCATA  | 115  |
|               | *****                                                         |      |
| AGAP007075-RA | AGTTGCACCTGTGCTGCCGGGTAAGCTTAGTGAAGCTAAATTCCTGACCATGTACGAGC   | 1440 |
| AGAP012821-RA | AGTTGCACCCGATGCTGCCGGGTAAGCTGAGTGAAGCCAAGTTCCTGACCATGTACGAGC  | 175  |
|               | *****                                                         |      |
| AGAP007075-RA | CATGGATAAGGCGCATTTATCTACCAAGCTATGCGAACACTGGCTGCTATCTGTACGGAG  | 1500 |
| AGAP012821-RA | CTTGGATACGGCGCATTTATCTACCAAGCTATGCAAACACTGGCTGCTACCTGTACGGAG  | 235  |
|               | * ****                                                        |      |
| AGAP007075-RA | TCATTGCCGGGTATCTGTACCATCGCACAAAGAACTACAAGATGCAGCTTGAACGATTTT  | 1560 |
| AGAP012821-RA | TCATTGCCGGGTATCTGTACCATCGCACAAAGAACTACAAGTTCGAGCTTGAACGATTTT  | 295  |
|               | *****                                                         |      |
| AGAP007075-RA | GGCTCTATCGATTGATCAACGCATACGTAACACCGGTACTGGTCGCGGTGACGGTGTCTT  | 1620 |
| AGAP012821-RA | GGCTCTATCGAATGATCAACGCATACGTAACACCGGTACTGGTCGCGGTGACGGTGTCTT  | 355  |
|               | *****                                                         |      |
| AGAP007075-RA | CCTTCCTCTGGTACGTGATCGAAGTCCCAAAACCTAACCTCTGGGTATCGCTCTACAGTG  | 1680 |
| AGAP012821-RA | CCTTCCTCTG-----TG                                             | 367  |
|               | *****                                                         | **   |
| AGAP007075-RA | CGCTTTACAGAAACATAATCGGCATCTTTGTGGCTGTGTGCTTTTGGCGCTCCATCGACA  | 1740 |
| AGAP012821-RA | CACTTTACAGAAACATAATCGGCATCTTTGTGGCTGTGTGCTTTTGGCGCTCCATCGACA  | 427  |
|               | * ****                                                        |      |
| AGAP007075-RA | AACCTCCTGGCATTTTGCCTAGCATTTCTCAGCTCCAAACTGCTGACCACACTCGGCAAGC | 1800 |
| AGAP012821-RA | ATCCTCCTGGCATTTTGCCTAGCATTTCTCAGCTCCAAACTGCTGACCACACTCGGCAAGC | 487  |
|               | * ****                                                        |      |
| AGAP007075-RA | TTACCTACAGTGCGTACGTACTGCACGATGTGGTGATGCGGTTTTTGCTGTTGCGCGAAA  | 1860 |
| AGAP012821-RA | TTACCTACAGTGCGTACGTACTACATGATGTGGTGATGCGGTTTTTGCTGTTGCGCGAAA  | 547  |
|               | *****                                                         |      |
| AGAP007075-RA | ACTTCAACAGTGTGATCAACGTGCAAAAGTTTATAGCTTGGGTGTACATTGTGACGGGGG  | 1920 |
| AGAP012821-RA | ACTTCAACAGTGTGATCAACGTGCAAAAGTTTATAGCTTGGGTGTACATTGTGACGGGGG  | 607  |
|               | *****                                                         |      |
| AGAP007075-RA | TAGCCTTTGCCGGTGGGCTGGTCGTGTTTCTTGCCATTGAGCAGCCCATGATTCAGCTGA  | 1980 |
| AGAP012821-RA | TAGCCTTTGCCGGTGGGCTGGTCGTGTTTCTTGCCATTGAGCAGCCCATGATACAGCTGA  | 667  |
|               | *****                                                         |      |
| AGAP007075-RA | TTAAACCGTACATAAGCCGAATGTGTCTGTAGGGGTAAAAGCAAAGCAGAAGTAA       | 2036 |
| AGAP012821-RA | TTAAACCGTACATAAGCCGAGTGTGCCCTGTAAGGGTAAAAGCAAAGCAGAAGTAA      | 723  |
|               | *****                                                         |      |

Sequence Logo 3.5.0 ([toolshed.g2.bx.psu.edu/repos/devteam/weblogo3/rgweblogo3/3.5.0](https://toolshed.g2.bx.psu.edu/repos/devteam/weblogo3/rgweblogo3/3.5.0))

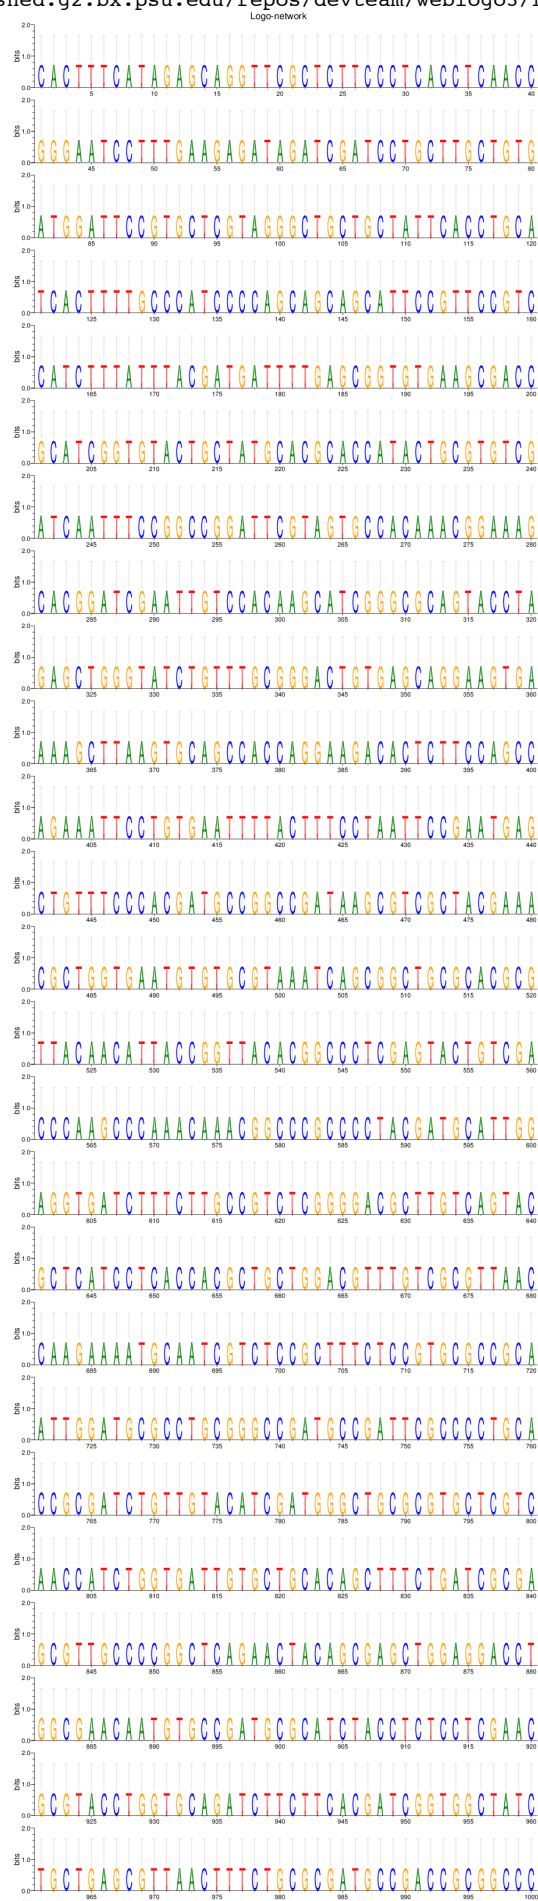

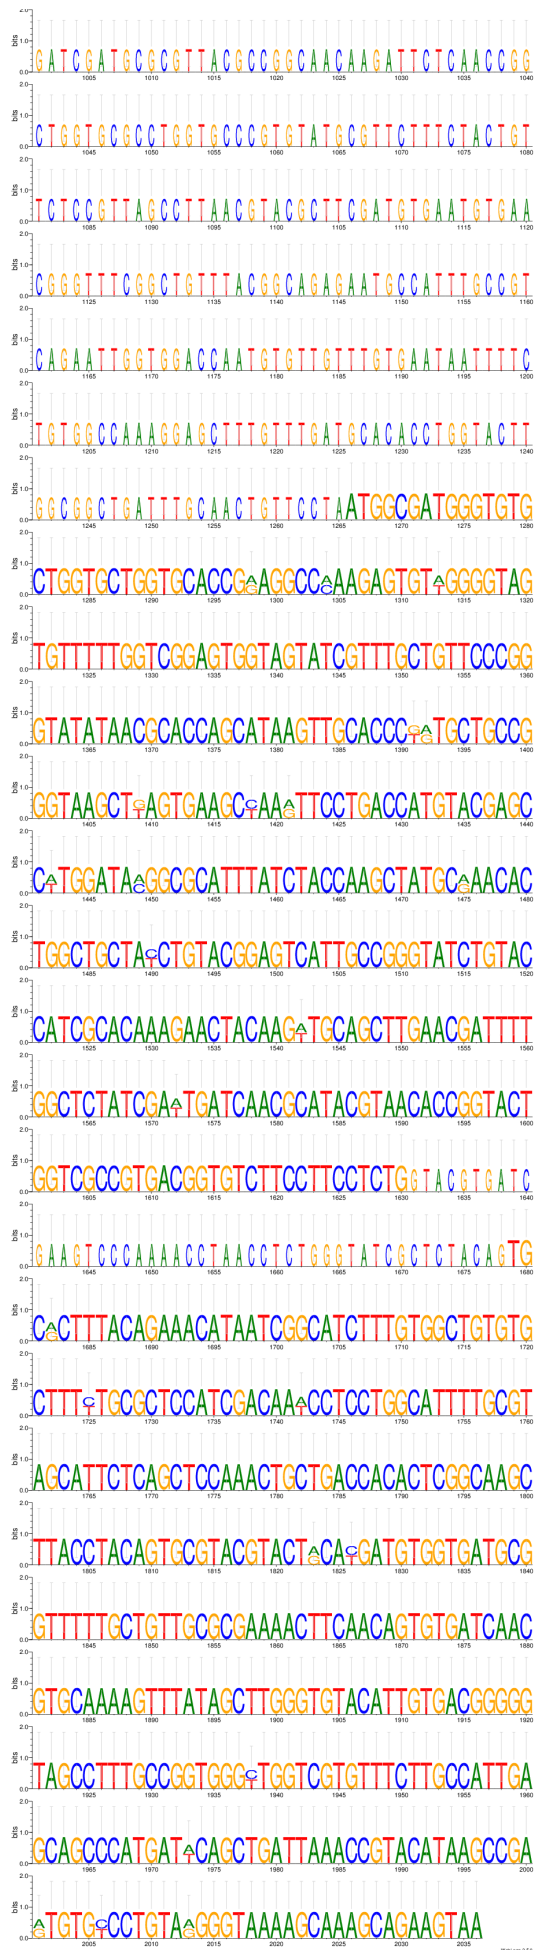

Ping-pong network 10:  
 CLUSTAL 2.1 multiple sequence alignment

```

AGAP012456-RA      ATGGTGCAGCACGAGCGCAACGTGATACATCGTGACATCCCGGAAAACCTTGCAGCTGGGG 60
AGAP012876-RA      -----CACGAGCGCAACGTGATACATCGTGACATCCCGGAAAACCTTGCAGCTGGGG 51
                   *****

AGAP012456-RA      CACGGTGGTGATCTGAAGATAGCTGATTTTCGGTTGGTCCGTGTACGAGCCGACCTTGTTTC 120
AGAP012876-RA      CACGGTGGTGATCTGAAGATAGCTGATTTTCGGTTGGTCCGTGTATGAGCCGACCTTGTTTC 111
                   *****

AGAP012456-RA      CGGACGCGGTGCGTTTCGCTCGACTATTTATCGCCCGAGATGGTACATGGTCAGCCGCAC 180
AGAP012876-RA      CGGACGCGGTGCGTTTCGCTCGACTATTTATCGCCCGAGATAGTGCATGGTCAGCCGCAC 171
                   *****

AGAP012456-RA      ACAAAAACGTGCGATCTATGGAATTTGGGCGTGCTGGCGTACAAGCTGCTGCGGTAAG 240
AGAP012876-RA      ATAAAAACGTGCGATCTATGGAATTTGGGCGTGCTGGCGTACAAGCTGCTGCGGTAAG 231
                   * *****

AGAP012456-RA      GCCCCGTTTTCGGCGACCAGTATGAAGAATCGTACCGTAAAATTATGAAGCTGCAGTTT 300
AGAP012876-RA      GTCCCGTTTTCGGCGACCAGTATGAGGAAACGTACTATAAAATCATGAAGCTGCAGTTT 291
                   * * * * *

AGAP012456-RA      AAGATGCCGCCAGATGTAACGAAGCCGGCGGTCCATCTGATCTCGCGACTGTTTCGTTAAG 360
AGAP012876-RA      AAGATGCCGCCAGATATGACGAAGCCGGCGGCCATCTGATCTCGCGACTGTTTCGTTAAG 351
                   *****

AGAP012456-RA      GATCTGGCCAGCCGTATGCCGCTGAAACATGTT----- 393
AGAP012876-RA      GATCTGGCCAGCCGTATGCCGCTGAAACATGTTGCGTCCATCCCTGGATTCTGGTGCACG 411
                   *****

AGAP012456-RA      -----
AGAP012876-RA      TGCACAAAAGTAAATAG 429
  
```

Ping-pong network 10:  
 Sequence Logo 3.5.0 (toolshed.g2.bx.psu.edu/repos/devteam/weblogo3/rgweblogo3/3.5.0)

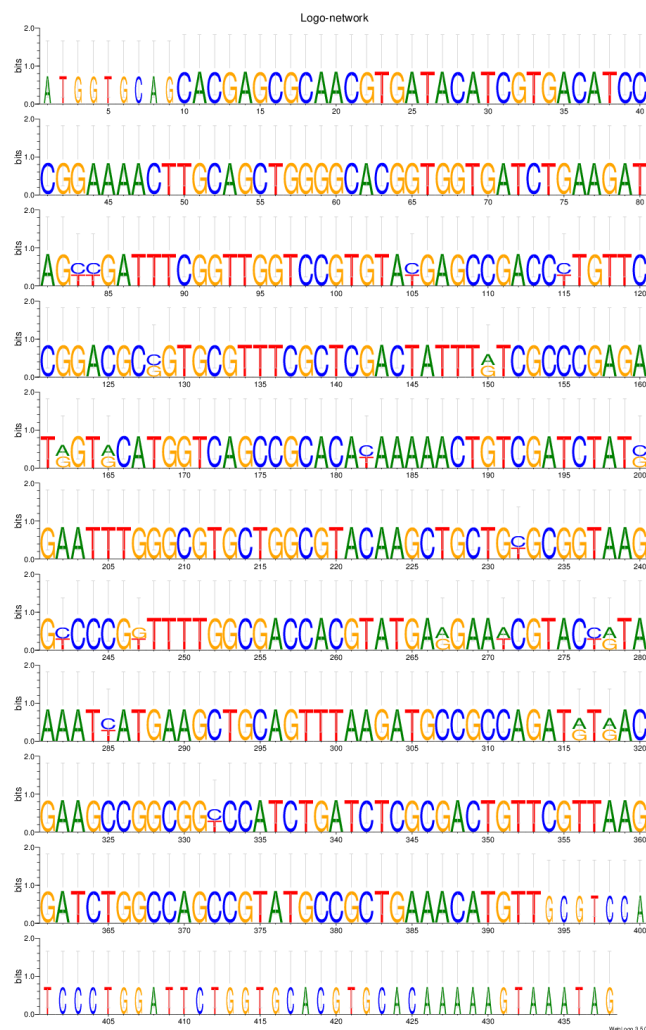



Ping-pong network 11:  
 CLUSTAL 2.1 multiple sequence alignment

```

AGAP007493-RA      AAAAAAACAGGTGCTAAATACTCATGTGGCGTGTCTACTTCCGCACGATCAGTCGCTT  60
AGAP013547-RA      -----

AGAP007493-RA      GCAACGGAGGGGCGATGGCTTCGTGTAGCAAATCGGTGGAATTCTCTTAGCTAATCGAG  120
AGAP013547-RA      -----

AGAP007493-RA      AGCATTCGCCGTGATTAAGTGAACCAACCAACCCAGTGAAGAGAGTTTCGGGTCATCATC  180
AGAP013547-RA      -----ATGGCGGTTGTTTACATTTCGTTGCGCTTATC  33
                        *  *  **  *  *  *  *  *  *
                        *  *  *  *  *  *  *  *  *

AGAP007493-RA      ATCATGTTCCCGTGGTTCGATATTCGGTCGATCAATTTGATCAACTTTCTGTTCCGCAAC  240
AGAP013547-RA      ATCAGGTTTCCGTGGTTCGATATTCGGTCG-----AGCTTTCTTTTCGTC AAC  81
      ****  ***  *****                               *  *****  ****  ****

AGAP007493-RA      CTCATCGTGACGGTCGTGGTGCTCGGTGGACTGTTGGCAACGATCGAAAAGCATCTGCCC  300
AGAP013547-RA      CTCATCGTGACGATCGTGGTGCTCGGTGGACTGTTGGCAACGATCGAAAAGCATCTCCCC  141
      *****  *****

AGAP007493-RA      ACCGCCATCCGGCAGACGTTCCGGTATGGCAAGCATGCGCTGAAGGGGTCGCCGACCGA  360
AGAP013547-RA      TCTGCCATCCGGCAGACGTTCCGG-----  165
      *  *****

AGAP007493-RA      TTGGTATCCCTGCTGGAGGTCCCGAAGGCGTGGTTCAAACATTTTTACGCTTTTGCTGCC  420
AGAP013547-RA      -----

AGAP007493-RA      CTCTGGTCGGTGGCCGGATTTCGCCGTCATGATGGAGACCTACCTCACTGGCCAGCCAGCG  480
AGAP013547-RA      -----CCAGCG  171
                        *****

AGAP007493-RA      CGGGACTACGTAATCGCCTTCCTCGACACGATGGCAACCAACAAGCGCATGGTGC GCACC  540
AGAP013547-RA      CGGGATTACGTAATCGCCTTCCTCGATACGTTGGCAACCAACAAGCGTATGGTGC GCACC  231
      *****  *****  ***  *****  *****

AGAP007493-RA      ACGCCTACCGAGACGATGGTTGCCATGACGCTGATCAGCTGCAGTGCTTGCGCCGGTTC  600
AGAP013547-RA      ACGCCTACCGAGACGATGGTTGCCATGGCGTTGATCAGCTGCAGTGTTTGCGCCGGTTC  291
      *****  **  *****  *****

AGAP007493-RA      TACGAGACCTGGTTCGTGCAGGTGTTCTCGAGCAAGCTGAAAATCAACCTGTCCGCGTAC  660
AGAP013547-RA      TACGAGACCTGGTTCGTGCAGGTGTTCTCGAGCAAGCTGAAAATCA-CCCACCAAGTG---  347
      *****  **  *  *  *

AGAP007493-RA      CTCGTCGGGTACATCCATTACTTCGGTACGATCGTGGCGATCCTAGCGCAGGCGGAAGGG  720
AGAP013547-RA      -----GTACGTGGAAGAACTT-----TCACAACATATCCTAA-GCAAAGGAAAGCA  390
      ****  *  *  ****  **  *  *****  **  *  ***

AGAP007493-RA      TTCACCCGCGCTGGTCCCGTCTCGCTGCCACCAACGGATATCGGTTTCGAGCCCAGCGTC  780
AGAP013547-RA      CTCGTCC-TGTTTCGTTCTGTGA-----  411
      **  **  *  *  *  *  *

AGAP007493-RA      CGATTAGCCCTGTGCGTTGGCGTGTTTTGCTACGCCTGGTACCACCAGTACCTGTGCAAC  840
AGAP013547-RA      -----

AGAP007493-RA      GTGATCCTGGCCAACCTGCGCAAGGACAAGGCGGGCAAAGTGGTGAGCCAGAAGCACAGC  900
AGAP013547-RA      -----

AGAP007493-RA      CTGCCAACCGGCGACTACTTCGATGCTGTATCCTCGCCCCACATGTTCTTCGAGATCGTG  960
AGAP013547-RA      -----

AGAP007493-RA      ATGTACGTCGTGCTGTTCTGTGTGCTGCACCGGAACAGTACGATGGTGTACGTGCTGCTG  1020
AGAP013547-RA      -----

AGAP007493-RA      TGGGTCTCTCGAATCAGCTGATGAACTCGTGGCTACCCACCAAGTGGTACGTGGAAAAC  1080
AGAP013547-RA      -----

AGAP007493-RA      TTTCCCAACTATCCCAAGCAAAGGAAAGCGCTCGTACCGTTCGTTCTGTAAGACCGACGG  1140
AGAP013547-RA      -----

AGAP007493-RA      TGAGGGTGGGACACAATATCATTCGGGTGTTGGGTATTTTTCGATTTAGGAAAACGGG  1200
AGAP013547-RA      -----

```

AGAP007493-RA  
AGAP013547-RA

TACAATCTGAATCGTTTCTGTTTGGTGCTAACCTTAATTGTAAGATCTTTACTGGTACTT 1260  
-----

AGAP007493-RA  
AGAP013547-RA

TCGCACTTTCATAAAGTGAAATAAACTGTTAATATGTCTCCTCT 1305  
-----

Ping-pong network 11:

Sequence Logo 3.5.0 ([toolshed.g2.bx.psu.edu/repos/devteam/weblogo3/rgweblogo3/3.5.0](http://toolshed.g2.bx.psu.edu/repos/devteam/weblogo3/rgweblogo3/3.5.0))

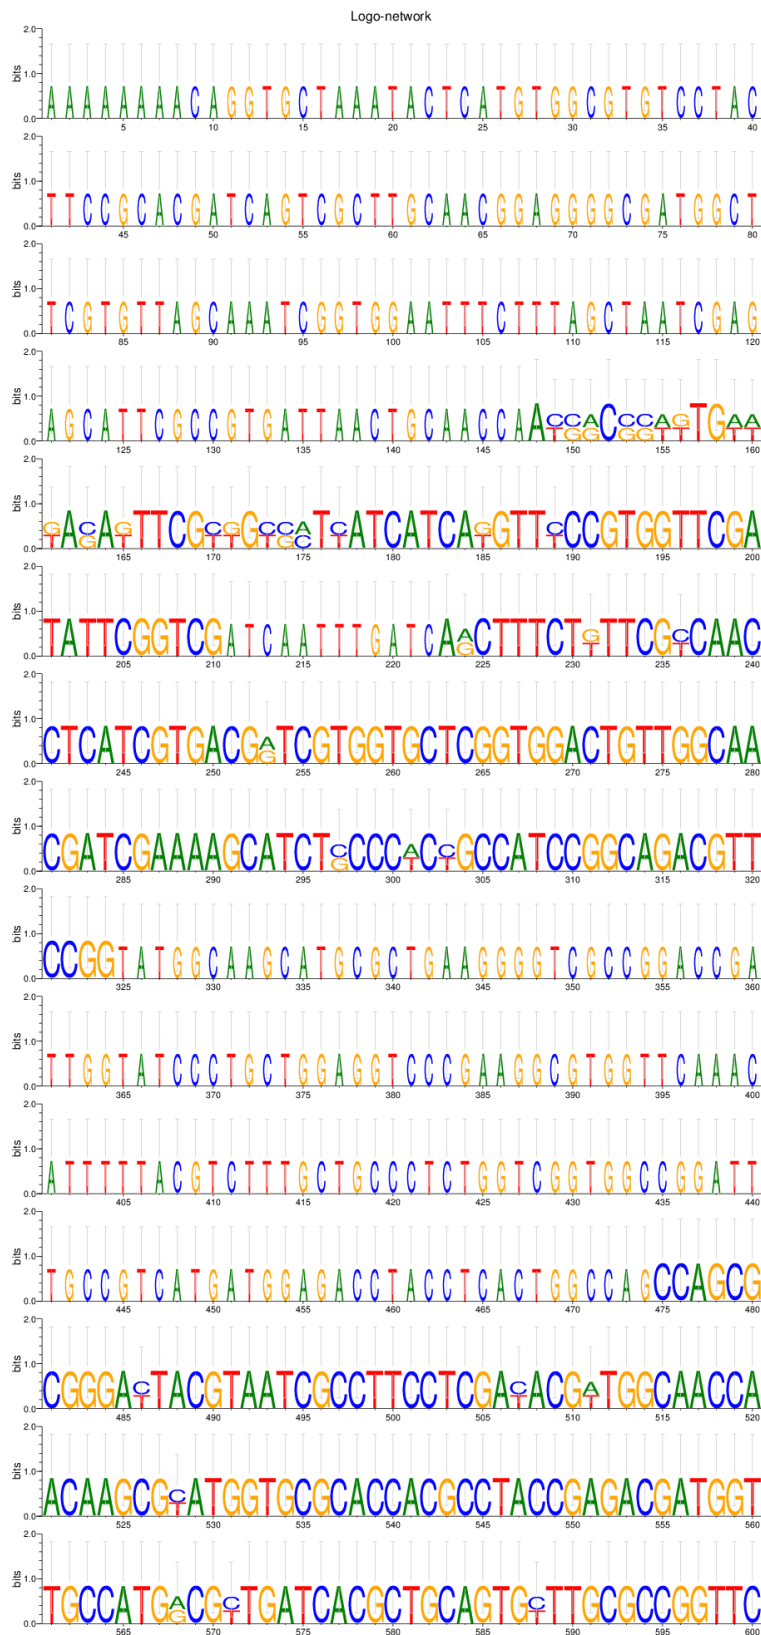

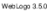

Ping-pong network 12, repeat A:

CLUSTAL 2.1 multiple sequence alignment of AGAP013040-RA and AGAP005338-RA

```

AGAP013040-RA      ATGACCAAGCGCGGTTTGTATTGATTTTGGTGGCTGCGAGCGGCATAACACCGTGGAA 60
AGAP005338-RA      ATGACCAAGCGCGGATTTGATTG-----TGGTGGCTGCGAGCGGCATAACACCGTGGAA 54
*****          *****

AGAP013040-RA      GATATGGTGCCTTGCAGAAAGTGCAGAAAGTGGTACCATTACGGGTGTGTGCGGCTCACT 120
AGAP005338-RA      GATATGGTGCCTTGCAGAAAGTGCAGAAAGTGGTACCATTACGGGTGTGTGCGGCTCACT 114
*****

AGAP013040-RA      GTGATGTCAAAATCTTGGTGCAATTGTGTGTGATGAAGGTGGCAAAGTGCGAAGCTATG 180
AGAP005338-RA      GTGATGTAAAAATCTTGGTGCAATTGTGTGTGATGAAGGTGGCAAAGTGCGAAGCTAAG 174
*****

AGAP013040-RA      GAGATGGGCGCTCTAAAGTCCCTCTAAGGCAGCCATTGCGATGACTGAGGTGCCTGCTGAA 240
AGAP005338-RA      GAGATGGGCGCTCTAAAGTCCCTCTAAGGAAGCCATTGCGATGACTGGGGTGCCTGCTGAA 234
*****

AGAP013040-RA      AGCTGCGAAGGCGACAAAAGAGCCAAAAGAGCAGCACATAGCGATGGCGAAGTCTCGGCG 300
AGAP005338-RA      AGCTGCGAAGGCGACAAAAGAGCAAAAAGAGCAGCACATAGCGAGGGCGAAGCCTCGGAG 294
*****

AGAP013040-RA      AATAAGCTGGCTACAGAGGAAAAAGAGCCCACTACATTCCATGCTGCAAAAAGGCCTCCT 360
AGAP005338-RA      AATAAGCTGGCTACAGAGGAAAAAGAGCCCACTACATTCCATGCTGCAAAAAGGCCTCCT 354
*****

AGAP013040-RA      ACCACTAATTTACCGACAACAACGCAACTCAAAAGGTCTAGGCAAGCGGCACTCGAAAAG 420
AGAP005338-RA      ACCGCAAAATTCATCCACAACAGCGCAACACAAAAGGTCTAGGCAAGCGGCACTCGAAAAG 414
*** *

AGAP013040-RA      CTTATGGAAGTGCAACAGCAAGAACGGGAGATGGCCATAAAAGAGTACGAGCTCAAAATG 480
AGAP005338-RA      CTTATGGAAGTGCAACAGCAAGAACGGGAGATGGCCATGAAAGAGTACGAGCTCAAAATG 474
*****

AGAP013040-RA      GCTAACCTCAAGCTCGAACATTTAAAGATTTCGACTTCAGCTCGAGGAGGAAAAGGTTTCG 540
AGAP005338-RA      GCTAACCTCAAGCTCGAACATTTAAAGATTTCGACTTCGGCTCGAGGAGGAAAGAGGCATCG 534
*****

AGAP013040-RA      ATTCGATCTGTGACCGATGCACGGATCAAGCATCAGCAGCAGCAGCATCAGCAGCAGCAT 600
AGAP005338-RA      ATTCGATCTGTGACCGATGCACGGATCAAGCATCAGCAGCAGC---ATCAGCAGCAGCAT 591
*****

AGAP013040-RA      CAGCAGCATCAGCAGCATCAGCAGCATCAGCAGCAGCAGCATCAGCAGCAGCAGCATCAG 660
AGAP005338-RA      CAGCAGCAGCATCAGCATCATCAGCATCAGCAGCAGCACCAGCATCAGCAACAGCACAAG 651
*****

AGAP013040-RA      CAGCAGCAGCAT-CAGCAGCAGC-AGCATCAGCTGCAGCAGCAGCATCAGCTGCAGCAGC 718
AGAP005338-RA      CAGAAACAGTGTTACGATAGCGGTGAGTGATGGTGAAATTGGTGAGCTCGCTAACGTCGAA 711
*** *

AGAP013040-RA      ATCATCAGCATCATCAGCATCATCAGCATCAGCAGCATCAGCAGCAGCAGCAGCAGCAGC 778
AGAP005338-RA      ATGGTAAATGTTG-CGACGAAACCG--TTCGACACCCTTGGCGATTGA----- 756
** *

AGAP013040-RA      AGCAGCAGCAGCATCAGCATCAGCATCAGCATCAGCATCAGCAACAGCACAAGCAGAAAC 838
AGAP005338-RA      -----

AGAP013040-RA      AGTGTCAGTAGCAGTGAGTGATGGTGAAATTGGTGAGCCCGCTAACGTCGAAATGGTAA 898
AGAP005338-RA      -----

AGAP013040-RA      ATGTGAATCCTGCGACAGTGGCAGTCGTAGACATGTCAGTTTTTGCCAAGTATCCTGAGA 958
AGAP005338-RA      -----

AGAP013040-RA      TGGCGCGGCGATCCACGCAATCACATAACCTTCCGTCGGATCACGTACACTCCCTACTAA 1018
AGAP005338-RA      -----

AGAP013040-RA      ACTGCCATGTGCGACACAACACATTTCTCCATGAGACGGTCCAATCTGGAGGAACAGAAT 1078
AGAP005338-RA      -----

AGAP013040-RA      CATTGACAAAACTTGTGCGTCGTGA 1104
AGAP005338-RA      -----

```

Ping-pong network 12, repeat A:  
Sequence Logo 3.5.0 (toolshed.g2.bx.psu.edu/repos/devteam/weblogo3/rgweblogo3/3.5.0) for  
AGAP013040-RA and AGAP005338-RA

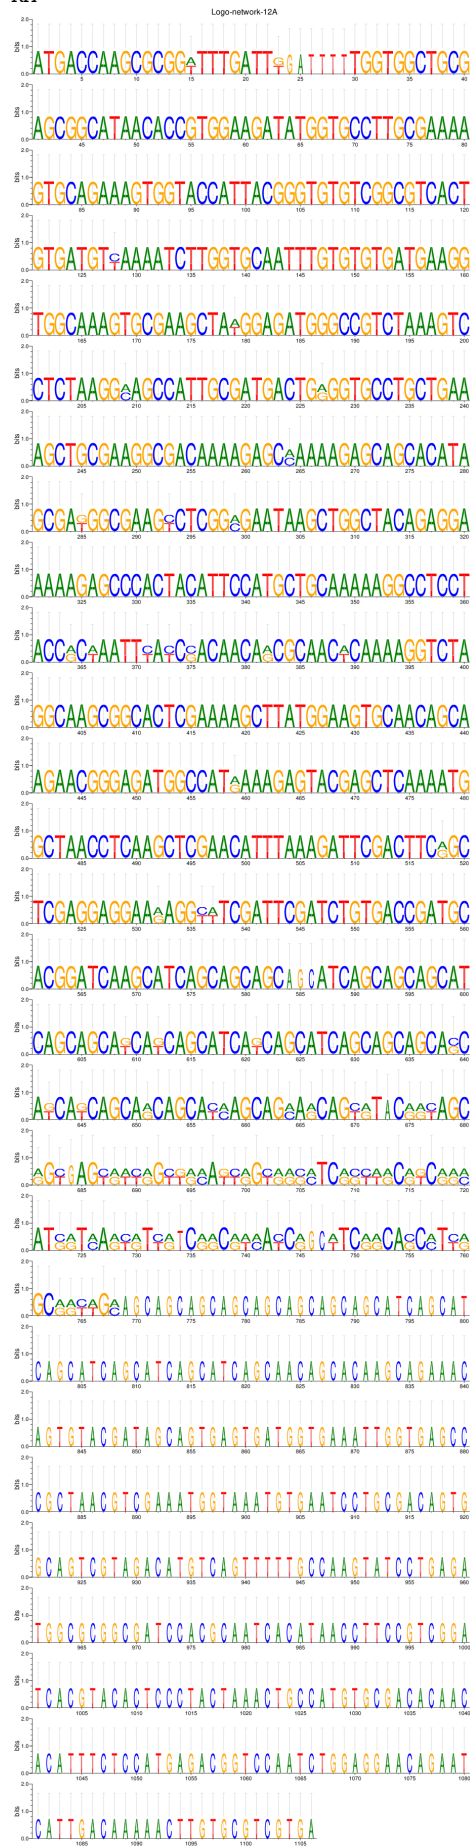

Ping-pong network 12, repeat B:

CLUSTAL 2.1 multiple sequence alignment of AGAP013040-RA positions 938-1104 and AGAP011262-RA positions 446-608

```

AGAP013040-RA_pos938-1104      TTTTGGCCAAGTATCCTGAGATGGCGCGGCGATCCACGCAATCACATAAC 50
AGAP011262-RA_pos446-608      TTTTGGCCAAGTATCCTGAGATGGCGCGGCGATCGACGCAATCACATAAC 50
                                *****
                                *****

AGAP013040-RA_pos938-1104      CTCCGTCGGATCACGTACACTCCCTACTAACTGCCATGTGCGACACAA 100
AGAP011262-RA_pos446-608      CTCCGTCGATCACGTACACTCCCTACTAACTGCCATGTGCGACACAA 100
                                *****

AGAP013040-RA_pos938-1104      CACATTCTCCATGAGACGGTCCAATCTGGAGGAACAGAATCATTGACAA 150
AGAP011262-RA_pos446-608      TACATTCTCCATGAGACGGTCCAATCTGGAGGAATAGAATCGTTGACAA 150
                                *****

AGAP013040-RA_pos938-1104      AACTTGTGCGTCGTGA 167
AGAP011262-RA_pos446-608      AACTTGTGCGTC--- 163
                                *****

```

Ping-pong network 12, repeat B:

Sequence Logo 3.5.0 (toolshed.g2.bx.psu.edu/repos/devteam/weblogo3/rgweblogo3/3.5.0) for AGAP013040-RA positions 938-1104 and AGAP011262-RA positions 446-608

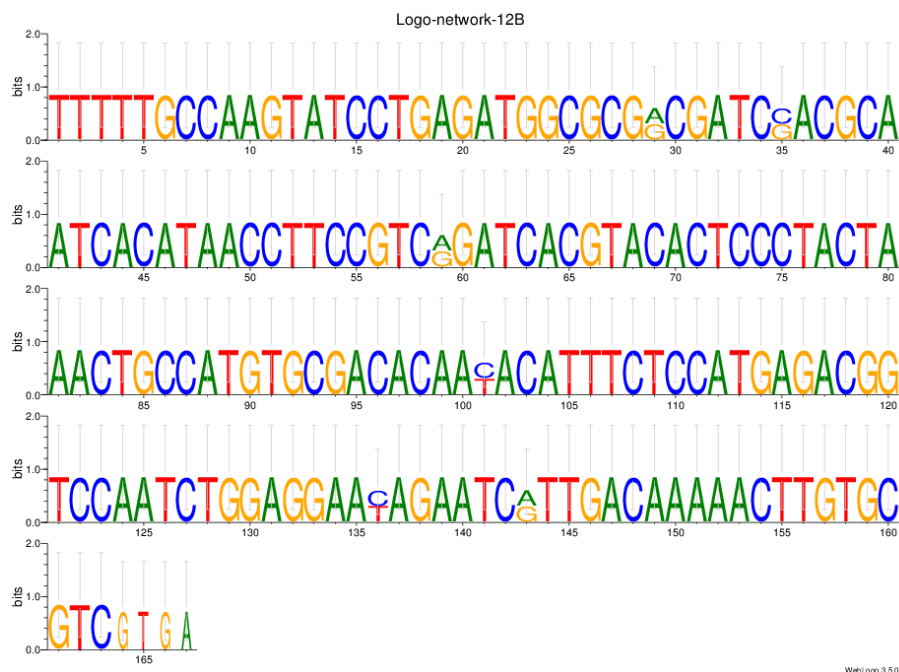

Ping-pong network 13:  
CLUSTAL 2.1 multiple sequence alignment

```
AGAP001089-RA      -----GAGTGTGCGAATCATGACTACAATGTTTACAATC  34
AGAP012592-RA      -----GAGTGTGCGAATCATGACTACAATGTTTACAATC  34
AGAP010306-RA      TGTCTTTACACGCATTGTTATTGTGTGTGAGTGTGCGAATCATGACTACAATGTTTACAATC  60
                      *****

AGAP001089-RA      CAAGAGCTGTACAGTAAATAAATAAGATTCGGTGCTTTCAAATAAAATTTGGATAGAAAA  94
AGAP012592-RA      CAAGAGCTGTACAGTAAATAAATAAGATACGGTGCTTTCAAATAAAATTTGGATCGAAAA  94
AGAP010306-RA      CAAGAGCTGTACAGTAAATAAATAAGATTTGGTACTTTCAAATAAAATTTGGATCGAAAA 120
                      *****

AGAP001089-RA      TTGAAAAAGTTTGTGAATTTGCATTACATACAGTCCATCACGGTGCCGCATCGTACCAGC 154
AGAP012592-RA      TTGAAAAAGTTTGTGAATTTGCATTACATACAGTGCATCACGGTGCCGCATCGTACCAGC 154
AGAP010306-RA      TTGAAAAAGTTTGTGAATTTGCATTACATACAGTGCATCACGGTGCCGCATCGTACCAGC 180
                      *****

AGAP001089-RA      AGGTCGATAAAATGTTGTGAATGAAGGAACGGCGG-TATATTAGGAATGGTTGTTTGAAGCA 213
AGAP012592-RA      AGGTCGATAAAATGTTGTGAATGAAGGAACGGCGG-TATATTAGGAATGGTTGTTTGAAGCA 213
AGAP010306-RA      AGGTCGATAAAATTTT-----AGGGGCGGTGTCTATTCTACGAACAATTCATATCGCC 232
                      *****

AGAP001089-RA      GCACGATGGCAGCGAAGCG-GTGAACCAACGCCACTTTGTGGGCGGTGGAAGTAAATGT  272
AGAP012592-RA      GCACGATGGCAGCGAAGCG-GTGAGCCAACCCACTTTGTGGGCGGTGGCAGTAAATGT  272
AGAP010306-RA      GGTGATTAGCTACGAGGTAAAGCGCATAGGTGTGCTTCTTCATGCCGTATGATTAAAAAT 292
                      *      * * * * *      *      *      *      *      *      *      *

AGAP001089-RA      AG--TAGCCACTGATA-ACCG----ACAAGAATATTTTGGTGATGATGAAGTGACCTCT  325
AGAP012592-RA      AG--TAGCCACTGATA-ACCG----ACGAGAATATTTTGGTGTTGATGAAGTGACCTCT  325
AGAP010306-RA      CCCTTCGCCACTGGGACACCGTGTGACGGAACCGTTCAAACCTAGCTTGAAGCTGCGCTA 352
                      *      * * * * *      *      *      *      *      *      *      *

AGAP001089-RA      GTTTGGAAGGTCTATTC-GACGAA-----CAATTCATATCG---CCGGTGATTAGC  372
AGAP012592-RA      GTTTGGAAGGTCTATTC-GACGAA-----CAATTCATATCG---CCGGTGATTAGC  372
AGAP010306-RA      GCTTGTGAAGTCTCTCCCGTCGAAGGTGTGCGCAAGCTACTTTGTACCCCGGCTGCTGGT 412
                      * * * * *      * * * * *      * * *      * * *      * *

AGAP001089-RA      TACGAGGTAA--GCGGCATAGGTATGCTTCTTCATGCCGTATGATTAA--ACATCCCTTC 428
AGAP012592-RA      TACGAGGTAA--GTGGCATAGGTGTCTTGTTCATGCCGTATGATTAA--AAATCCCTTC 428
AGAP010306-RA      GATCTAGGAACGGCAGCTCAGG-ATTTGCAAGCATTTAGTTTACTGGACGGGAGCAATC 471
                      *      * * * * *      *      * * * * *      * * * * *

AGAP001089-RA      GCCACTGGGACACCGTGTGACGGAACCGTTCAAACCTAGCTT----- 470
AGAP012592-RA      GCCACTGGGACACCGTGTGACGGAACCGTTTAAACCTAGCTT----- 470
AGAP010306-RA      ATTATCTAAGCCAGGAGCTACGGCGGCATACCGAGTGGTCTCGTTTTCGTTGACGGCTGC 531
                      *      *      * * * * *      *      *      *

AGAP001089-RA      -----
AGAP012592-RA      -----
AGAP010306-RA      TGGAACAAAAATGCCAAAAGATGTACGGTGAATGCAGAAACGTATCTGACGTTCCGGGC 591

AGAP001089-RA      -----
AGAP012592-RA      -----
AGAP010306-RA      GGGGAAGGAGCAGCAGGAACCTTGAAGAAGTTGTCTTGCGCTAGCCAAGAGAGGAGTCAAG 651

AGAP001089-RA      -----
AGAP012592-RA      -----
AGAP010306-RA      TCATAGACACCATTAACAATATATCGTTGCCAAATCGTACCGGACGCAACGCCGAGCT  711

AGAP001089-RA      -----
AGAP012592-RA      -----
AGAP010306-RA      GACCCTCAGTTTGTCTTTTGGATTGTTACTCGTGCTGTAAGATGTGTTCTCTGTTT 771

AGAP001089-RA      -----
AGAP012592-RA      -----
AGAP010306-RA      CATATTCTCTTACGAAATCTATAAACTATACCGGTTTCCATTCTGAAGAAAGAGGACTAC 831

AGAP001089-RA      -----
AGAP012592-RA      -----
AGAP010306-RA      ATTTAAATTATGCCAACGATGGATCGTTTGGACAGATTGACTATTTTGCCGTGAAATCT 891

AGAP001089-RA      -----
AGAP012592-RA      -----
AGAP010306-RA      CACATCGCCTCCTAGTTTGTACCAACATACACATCGATATCGTTAATCGACATTGTAG 951
```

AGAP001089-RA  
AGAP012592-RA  
AGAP010306-RA

-----  
-----  
GTATTTCAGATTATATAAACTGTACGAACTACATGTTTCGTCGTTCTCTTA 1000

Ping-pong network 13:

Sequence Logo 3.5.0 ([toolshed.g2.bx.psu.edu/repos/devteam/weblogo3/rgweblogo3/3.5.0](http://toolshed.g2.bx.psu.edu/repos/devteam/weblogo3/rgweblogo3/3.5.0))

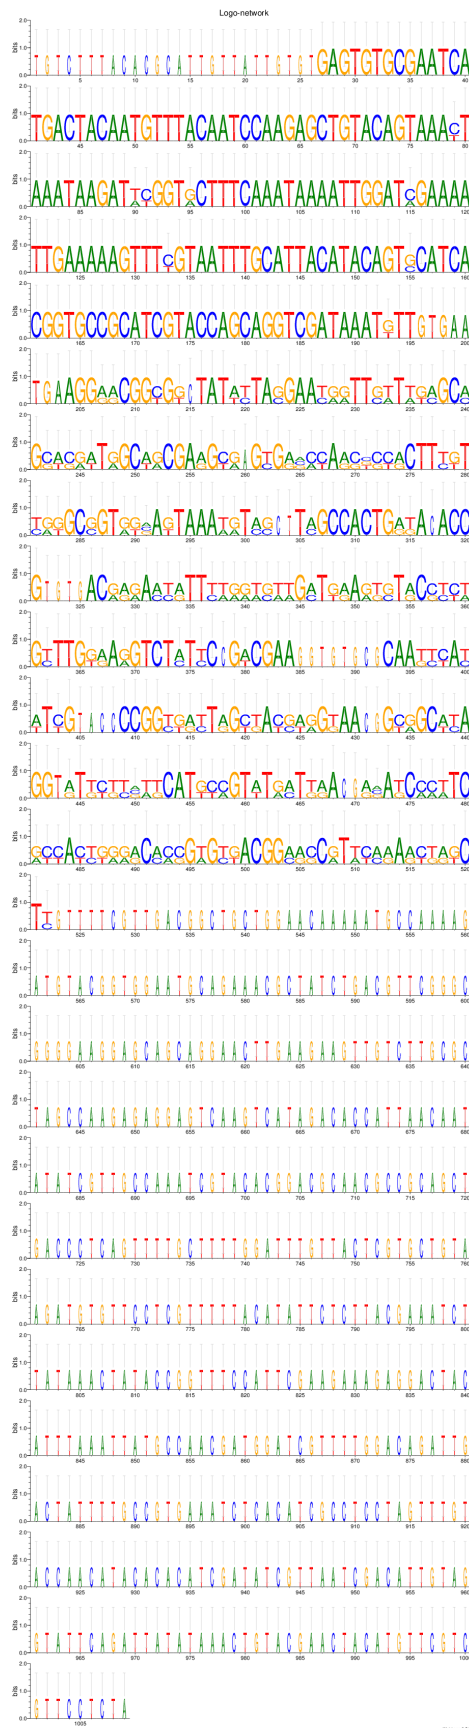



Ping-pong network 14:  
ClUSTAL 2.1 multiple sequence alignment

```
AGAP012450-RA      ATGCCATTCTCAATAGTGCAAACCCGTGGGCCTAAAGGGTACGCTGAATCAAGCATTGTT 60
AGAP012715-RA      ATGCCATTCTCAATAGTGCAAACCCGTGGGCCTAAAGGGTACGCTGAATTAAGCATTGTT 60
AGAP012588-RA      CTGCCATTCTCAATAGTGCAAACCCGTGGGCCTAAAGGGTACGCTGAATTAAGCATTGTT 60
                      *****
AGAP012450-RA      CCTGATTCTCTGGGTTCAAGGCAC TAGCCATAAAAAA---ACATAT-TTTGGCCAAACGT 116
AGAP012715-RA      CCTGATTCTCTGGGTTCAAGGCAC TAGCCATAAAAAAACATATCTGT-TTTGGCCAAACGT 119
AGAP012588-RA      CCTGATTCTCTGGG-----CACTAGCCATAAAAAAC---ATATCTGTTTGGCCAAACGT 110
                      *****
AGAP012450-RA      TAAAGGAAACATACAACATCTAATTACGAATGATAATAGTGTTCCGGAAGAAGGATGGAT 176
AGAP012715-RA      -AAAGGAAACA--CAACATCTAATTACGAATGATAATAGTGTTCCGGAAGAAGGATGGAC 176
AGAP012588-RA      TAAAGGAAACATACAACATCTAATTACGAATGATAATAGTGTTCCGGAAGAAGGATGGAC 170
                      *****
AGAP012450-RA      GAAACAGGAGTGTCAGATTAAAGCGCAAGGATTATCATACGAAGCTGCTGATTGCACTAT 236
AGAP012715-RA      GAAACAGGAGTGTCAGATTAAAGCGCAAGGATTATCATACGAAGCTGCTGATTGCACTAT 236
AGAP012588-RA      GAAACAGGAGTGTCAGATTAAAGCGCAAGGATTATCATACGAAGCTGCTGATTGCACTAT 230
                      *****
AGAP012450-RA      AATGATCATATCCGGCGAATCATCTACAGATTCCGGAAGGAACCGATATTAGCTAGTTG 296
AGAP012715-RA      AATGATCATGTCCGGTGAATCATCTACAGATTCCGGAAGGAACCGATATTAGCTAGTTG 296
AGAP012588-RA      AATGATCATGTCCGGCGAATCATCTACAGATGCTGGAAGCAACCGATATTAGCTAGTTG 290
                      *****
AGAP012450-RA      CAGAGAAACAACCTTCATACGCTGATATGTTTCAACAAGAATTGTGGAAAACCTCTTAAAC 356
AGAP012715-RA      CAGAGAAACAACCTTCATACGCTGATATGTTTCAACAAGAATTGTGGAAAACCTCTTAAAC 356
AGAP012588-RA      CAGAGAAACAACCTTCATACGCTGATATGTTTCAACAAGAATTGTGGAAAACCTCTTAAAC 350
                      *****
AGAP012450-RA      TCCAATCCGCGTCGAGAATGAAATCGACATCTCCTCACCACCTACGTCGCCTCTTACACC 416
AGAP012715-RA      TCCAATCCGCGTCGAGAATGAAATCGACATCTCCTCACCACCTACGTCGCCTCTTACACC 416
AGAP012588-RA      TCCAATCCGCGTCGAGAATGAAATCGATATCTCCTCACCACCTACGTCGCCTCTTACACC 410
                      *****
AGAP012450-RA      AAGTTTGTAGAAAGTGGATGAATATGTTGGTTTCAGTTGAGGTAGTCCCAGAAGAAGTTTC 476
AGAP012715-RA      AAGTTTGTAGAAAGTGGATGAATATGTTGGTTTCAGTTGAGGTAGTCCCAGAAGAAGTTTC 476
AGAP012588-RA      AAGTATGTGAGAAGTGGATGAATATGTTGGTTTCAG----GTAGTCCCAGAAGAAGTTT- 464
                      ****
AGAP012450-RA      ACGTGACAAGACGATAAAAGAAATAATAGAAGCCCAAACCTAATATGATGATAGAGCTTCG 536
AGAP012715-RA      ACGTGACAAGACGATAAAAGAAATACTAGAAAGCCCAAACCTAATATGATGATAGAGCTTCG 536
AGAP012588-RA      ACGTGACAAGACGATAAAAGAAATACTAGAAAGCCCAAACCTAATATGTTGATAGAGCTTCG 524
                      *****
AGAP012450-RA      TAATGAGCAAAAGCAGATTTTAAAGAACAAGAAAGAAATAGTGAGTCGTATCGGCATAAT 596
AGAP012715-RA      TAATGAGCAAAAGCAGATTTTAAAGAACAAGAAAGAAATAGTGAGTCGTATCGGCATAAT 596
AGAP012588-RA      TAATGAGCAAAAGCAGATTTTAAAGAACAAGAAAGAAATAGTGAGTCGTATCGGCATAAT 584
                      *****
AGAP012450-RA      CGAAGTACAATTAATACTTTACTTAAATCATACCGAAGTAAGTACTACTAATCTTACTGG 656
AGAP012715-RA      CGAAGTACAATTAATACTTTACTTAAATCATACCGTAGTAAGTACTACTAATCTCACTGG 656
AGAP012588-RA      CGAAGTACAATTAATACTTTACTTAAATCATACCGAAGTAAGTACTTCTAATCTTACTGG 644
                      *****
AGAP012450-RA      TTTTGACCATCCATTCAAAGACAATGCCGAAGATCTGGAAAAATTGAAAAAGATTAGA 716
AGAP012715-RA      TTTTGACCATCCATTCTGATAGCAATGCCGAAGATCTGGAAAAATTGAAAAAGATTAGA 716
AGAP012588-RA      TTTTGACCATCCATTCTGATAGAAATGCCGAAGATCTGGAAAAATTGAAAAAGATTAGA 704
                      *****
AGAP012450-RA      TGAGGAAGAATATTATATCCAAATAGTAAGCTTATTGAAACAAAAAATTATGATAAAGA 776
AGAP012715-RA      TGAGGAAGAATATTATACCCAAGTAGTAAGCTTATTGAAACAAAAAATTATGATAAAGA 776
AGAP012588-RA      TGAGGAAGAATATTATACCCAAGTAGTAAGCTTACTGAAACAAAAAATATTGATAAAGA 764
                      *****
AGAP012450-RA      TATAAACAAACAGAATGTTTCGCAACCCCTTGATGCCCTTTTCGATAGGAGTTTCTTAACAAA 836
AGAP012715-RA      TATAAACAAACAGAATGTTTAGCAACCCCTTGATGCCCTTTTCGATAGGAGTTTCTTAACAAA 836
AGAP012588-RA      TATAAACAAACAGAATGTTAGCAACCCCTTGATGCCCTTTTCGATACGAGTTTCTTAACAAA 824
                      *****
AGAP012450-RA      GTGCACATGGACCGGTATTCTAAATCAGGAACCTAAATAGCAATGCATTCAATTAATAA 896
AGAP012715-RA      GTGCACATGGACAGGTATTCTAAATCAGGAACCTAAATAGCAATGCATTCAATTAATAA 896
AGAP012588-RA      GTGCACATGGACAGGTATTCTAAATCAGGAACCTAAATAGCAATGCATTCAATTAATAA 884
                      *****
AGAP012450-RA      TGTAGTAAATCTTTTAAATGCGTAGGAAGTACTAACCTTGTGCCAGTCACAGATGAAAC 956
AGAP012715-RA      TGTAGTAAATCTTTTAAATGCGTAGGAAGTACTAACCTTGTGCCAGTCACAGATGAAAC 956
AGAP012588-RA      CGTAGTAAATCTTTTAAATGCGTAGGAAGTACTAACCTTGTGCCAGTCACATGAAAC 944
                      *****
```

AGAP012450-RA GGTGCAAGGTTTCTTCATGAATAGATTGAAACACGCATTAGAACGATCTAAGGCCAAAGG 1016  
 AGAP012715-RA GGTGCGAGGTTTCTTCATGAATAGATTGAAACACGCATTAGAACGATCTAAGGCCAAAGG 1016  
 AGAP012588-RA GGTGCAAGGTTTCTTCACGAATAGATTGAAACACGCATTAGAACGATCTAAGGCCAAAGG 1004  
 \*\*\*\*\*

AGAP012450-RA TCTACGCAAATCAACTAGCCGTAAAAGAAAATTAATATAA 1056  
 AGAP012715-RA TCCACGCAAATCAACTAGCCGTAAAGGAAAATTAATATAA 1056  
 AGAP012588-RA TCTACGCAAATCAACTAGCCGTAAAAGAAAATTAATATAA 1044  
 \*\* \*\*\*\*\* \*

Ping-pong network 14:

Sequence Logo 3.5.0 ([toolshed.g2.bx.psu.edu/repos/devteam/weblogo3/rweblogo3/3.5.0](http://toolshed.g2.bx.psu.edu/repos/devteam/weblogo3/rweblogo3/3.5.0))

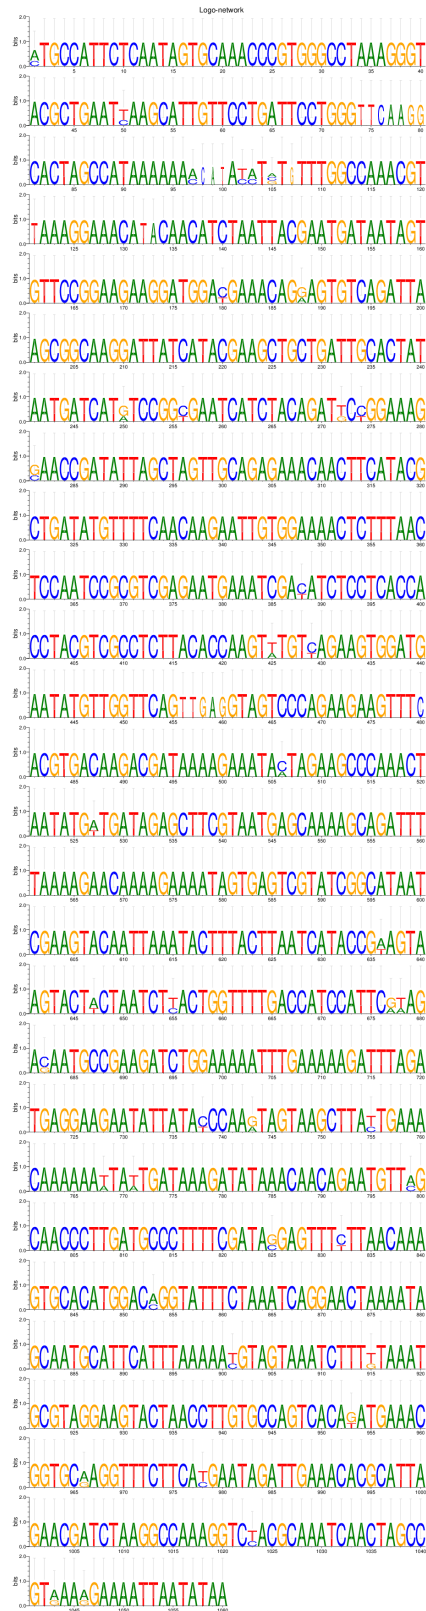

Ping-pong network 15:  
CLUSTAL 2.1 multiple sequence alignment

```
AGAP012455-RA      -----
AGAP012701-RA      ATACCGTCGGAGCCGTGTATTGCGGCGTCTGCATATGGTGCACAAATGCCGTCATCGATT 60

AGAP012455-RA      -----
AGAP012701-RA      GCAACAATGCCAAGTTCGACTGGCTCATTATACACCATGACGCCACCAACTTCAGTTGCA 120

AGAP012455-RA      -----
AGAP012701-RA      GTCACGTCCTCGATTGTGTCTTCAACAAGAATGGCCACAGCAACTTTGCTTCCATCGGGG 180

AGAP012455-RA      -----
AGAP012701-RA      ACATTCATTAGAACGGTTGCACCATCCACGCCTGCGCAGACAACATATGTTGTAGCTTCA 240

AGAP012455-RA      -----
AGAP012701-RA      TCGACTGCGACTACATCAACGGTAGCATCATCTCATTACATCCATTCAGCATGGCGTGCA 300

AGAP012455-RA      -----
AGAP012701-RA      CCCCCACCGACACCCGCACCCATTTTTTCGATGCAGCCGACCTCAATCAAGTTCCCTTCT 360

AGAP012455-RA      GCACCTGTGGTGC---ATGGTTCA-CCTGTGTGCCTTCG-ACTTCAACACGA---TGCCC 53
AGAP012701-RA      GGGACCATAATACGGATGGTTCAACCTGGAGTAAATCCGCAAACCAATCCAACGTGCCT 420
*   *   *   *   *   *   *   *   *   *   *   *   *   *   *   *   *

AGAP012455-RA      GCGTCCT--ATCGGCACGGTTTTACGGGCTAATATACCGT-CGGAGCCGTGTATTGCGGC 110
AGAP012701-RA      GTGCCTTCAATTGGAATGCCTTCCACAGCAAGACTTCCATGTGGAAGAACGGTTCAGATC 480
*   *   *   *   *   *   *   *   *   *   *   *   *   *   *   *   *

AGAP012455-RA      GTCTGCATATGGTGTACAAATGCCGT---CATCGATTGCAACAATGCCAAGTTCGACTGG 167
AGAP012701-RA      GGCCAACTAGCAT-TGAATGTGCCGGGTGCATCAGTTATGCATTCGTCTGGTACGGCTA- 538
*   *   *   *   *   *   *   *   *   *   *   *   *   *   *   *   *

AGAP012455-RA      CTCATTATACACCACGACGCCACCGAC---TTCAGTTG--CAGTCA-CGTCTTCGATTGT 221
AGAP012701-RA      --CGATTTGACCGCGCAACCATCGACCAATCCAACCAATCGACCAGCATTTGGTGTCTGT 596
*   *   *   *   *   *   *   *   *   *   *   *   *   *   *   *   *

AGAP012455-RA      GTCTTCAACAAGAATGGCCACAGCAACTTTGCTTCCATCGGGGATATTCATTAGAACGGT 281
AGAP012701-RA      GCCTTCGCTGGGAACGTCAACTGCTCCTATGCTTCCTTATGGAACCACAATCCGTACCAT 656
*   *   *   *   *   *   *   *   *   *   *   *   *   *   *   *   *

AGAP012455-RA      TGCACCATCCACGCCTGCGCAGACAACATATGTTGTAGCTTCATCGACTGCGACTACATC 341
AGAP012701-RA      TGTACCATCTGCAACCGTT-----ACATCTCCGTCGACTACAGTAACAGCAACAGC-CC 709
*   *   *   *   *   *   *   *   *   *   *   *   *   *   *   *   *

AGAP012455-RA      AACGCCAGGCACTTCTTACTCGGACGATAAAATCAGCTTTGACTTCTACAGTGTATGCAAC 401
AGAP012701-RA      A--GTCAGGCACTTCTTACTCGGACGATACATCAGCTTCGACTTCTACAGTGTATGCAAC 767
*   *   *   *   *   *   *   *   *   *   *   *   *   *   *   *   *

AGAP012455-RA      TTCGTTGCAAAATGGCTGCATCATCACTTCATTACACGGGTGTCAGCGCTTCGACCTTCCGT 461
AGAP012701-RA      TTCGTTGCAAAATGGCTGCATCATCACTTCATTACACGGGTGTCAGCGCTTCGACCTTCCGT 827
*   *   *   *   *   *   *   *   *   *   *   *   *   *   *   *   *

AGAP012455-RA      TAAACCACTGTCAGGAACGACTAAGGCAACGCCAATCGCATCTTATTCATCTGGTAGAAG 521
AGAP012701-RA      TAAACCACTGCCAGGAACGACTAAGGCAACGCCAATCGCATCTTATTCATCTGGTAGAAG 887
*   *   *   *   *   *   *   *   *   *   *   *   *   *   *   *   *

AGAP012455-RA      TACAGCACCTTCCATTACATTACTTCAATAGAATTGCTTCCTTCCTTGACCATGACACC 581
AGAP012701-RA      TACAGCACCTTCCATTACATTACTTCAATAGAATTGCTTCCTTCCTTGACCATGACACC 947
*   *   *   *   *   *   *   *   *   *   *   *   *   *   *   *   *

AGAP012455-RA      ACCAGAATCACCACAAATAAAATCAATCGGGTCAGATTTCGGTCACATCGCAGCTTGCCGT 641
AGAP012701-RA      ACCAGAGTCACCACAAATAAAATCAATCGGGTCAGATTTCGGCCACATCGCAGCTTGCCGT 1007
*   *   *   *   *   *   *   *   *   *   *   *   *   *   *   *   *

AGAP012455-RA      TTCCCGGTGTACGCAGCCATCAACATCCGGTATACTCTTAAAAAATTCATCGGTTGTGCC 701
AGAP012701-RA      ATCCCGTTGTACGCAGCCATCAACATCCGGTATACTCATAAAAGATTTCATCGGTTGTGCC 1067
*   *   *   *   *   *   *   *   *   *   *   *   *   *   *   *   *

AGAP012455-RA      TACAAAATCAAAAAGTGCAACAATTACAGAAAACCTACCTACTGCTGCCATAGTGTGCTC 761
AGAP012701-RA      TACAAAATCAAAAAGTGGAACAATTACAGAAAACCTACCTACTGCTGCCATAGTGTGCTC 1127
*   *   *   *   *   *   *   *   *   *   *   *   *   *   *   *   *

AGAP012455-RA      GGAAACATCTCAAAATCTGGACTCGAGCATCAGCAGCGTGGAGTCTATG----- 810
AGAP012701-RA      GGAAACATCTCAAAATCTGGACTCGAGCATCAGCAGCGCTGGAGTCTATGGTAGATATGTT 1187
*   *   *   *   *   *   *   *   *   *   *   *   *   *   *   *   *
```

AGAP012455-RA  
AGAP012701-RA

-----  
ACCAGATTTTCGATAGCAATAATGATACGATCCCAAAAACCAGGAACACATT 1239

Ping-pong network 15:

Sequence Logo 3.5.0 (toolshed.g2.bx.psu.edu/repos/devteam/weblogo3/rgweblogo3/3.5.0)

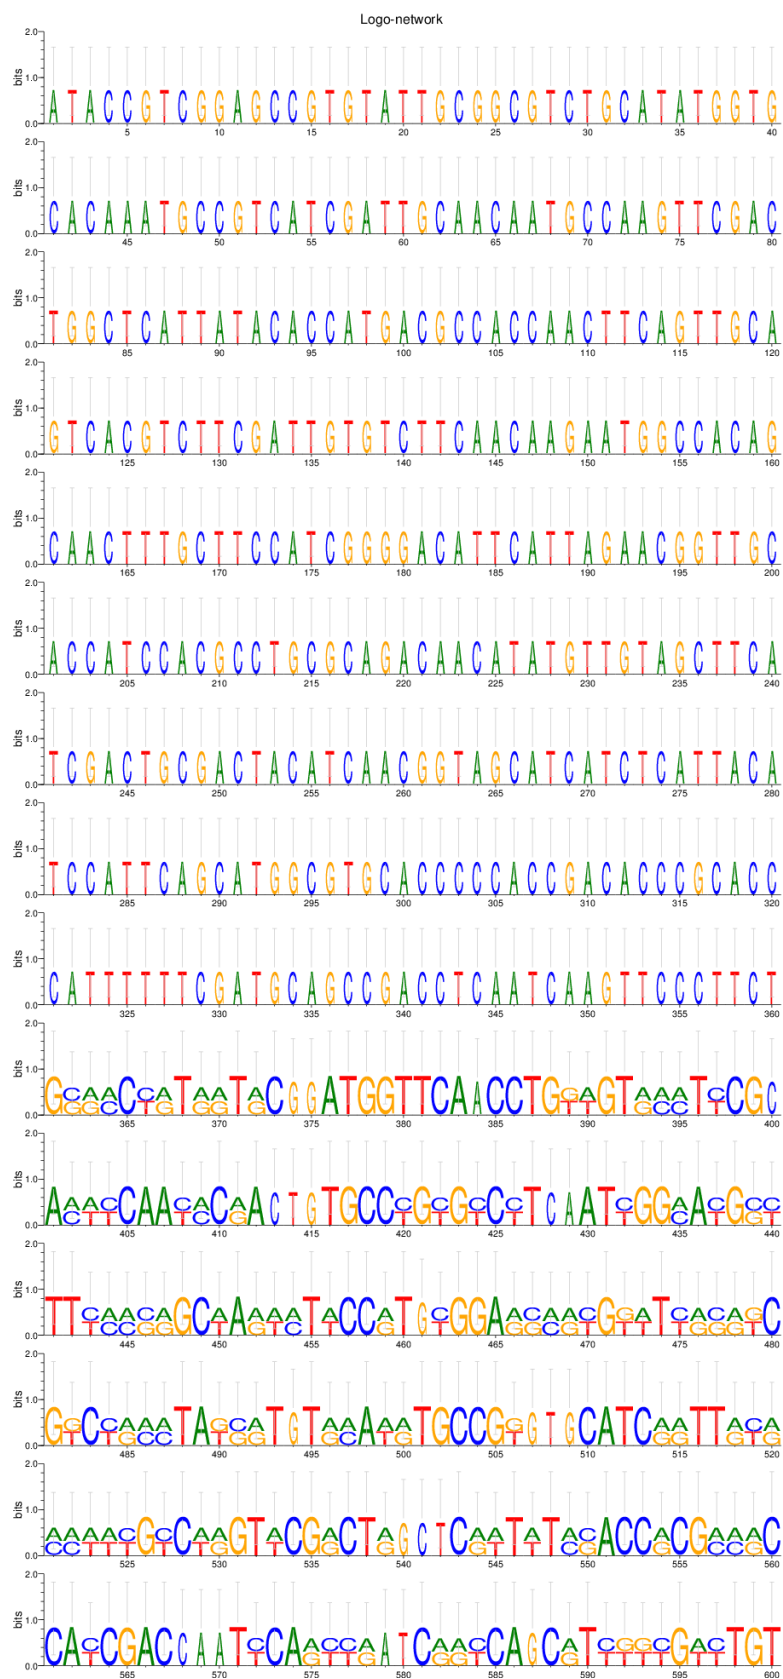

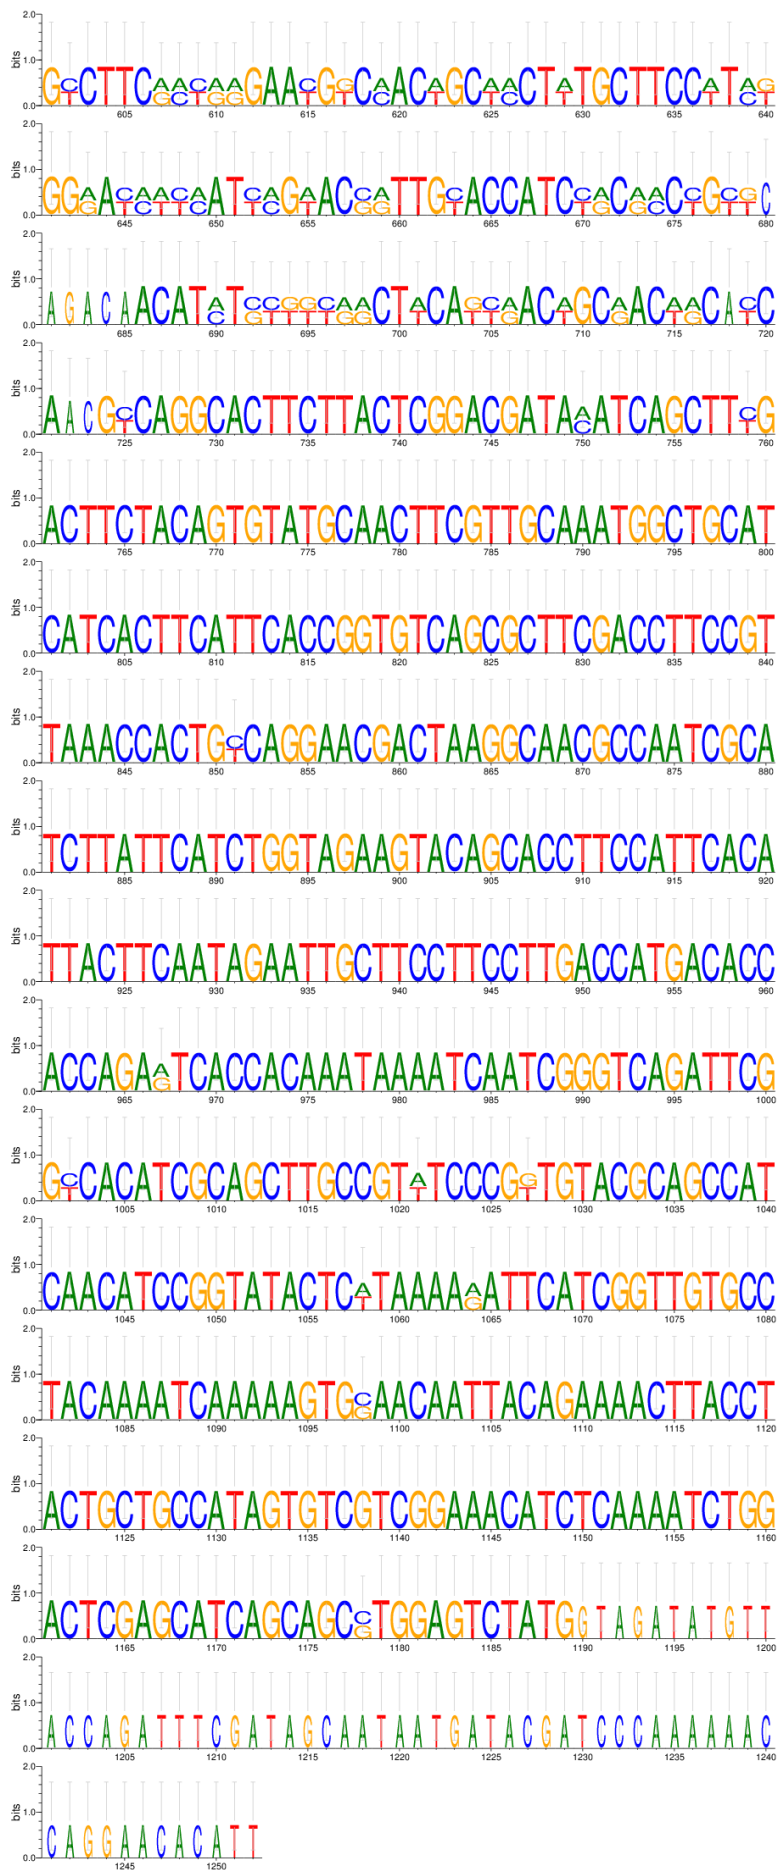

|               |                                                                |     |
|---------------|----------------------------------------------------------------|-----|
| AGAP012560-RA | -----                                                          |     |
| AGAP012710-RA | ATGGCACCCAAAACCACTGGAAAAGCTGCGAAGAAGTCTGGCAAGGCCCAGAAAAATATT   | 60  |
| AGAP012560-RA | -----NACAAGAAAAAGAAGCGCAAGACTCGCAAGGAAAGCTACGCTATTTACATC       | 51  |
| AGAP012710-RA | TCCAAGTCCGACAAGAAAAAGAAGCGCAAGACCCGCAAGGAAAGCTACGCTATTTACATC   | 120 |
|               | *****                                                          |     |
| AGAP012560-RA | TACAAAGTGTTGAAGCAAGTCCACCCGGATACTGGCATCTCTTCGAAGGCCATGAGCATC   | 111 |
| AGAP012710-RA | TACAAAGTGTTGAAGCAAGTCCACCCGGATACTGGCATCTCTTCGAAGGCCATGAGCATC   | 180 |
|               | *****                                                          |     |
| AGAP012560-RA | ATGAACAGTTTCGTCAACGATATCTTCGAACGCATTGCTGCTGAGGCATCCCGCTTGGCG   | 171 |
| AGAP012710-RA | ATGAACAGTTTCGTCAACGATATCTTCGAACGCATTGCTGCTGAGGCATCCCGCTTGGCG   | 240 |
|               | *****                                                          |     |
| AGAP012560-RA | CACTACAACAAGCGTTTCGACGATCACGTCCCGCGAAATCCAAACCGCTGTTTCGTCTGCTG | 231 |
| AGAP012710-RA | CACTACAACAAGCGTTTCGACGATCACGTCCCGCGAAATCCAAACCGCTGTTTCGTCTGCTG | 300 |
|               | *****                                                          |     |
| AGAP012560-RA | CTGCCTGGTGAGCTTGCCAAGCACGCCGTCTCCGAAGGAACGAAGGCTGTCAAAAGTAC    | 291 |
| AGAP012710-RA | CTGCCTGGTGAGCTTGCCAAGCACGCCGTCTCCGAAGGAACGAAGGCTGTCAAAAGTAC    | 360 |
|               | *****                                                          |     |
| AGAP012560-RA | ACCAGCTCGAAGTAA                                                | 306 |
| AGAP012710-RA | ACCAGCTCGAAGTAA                                                | 375 |
|               | *****                                                          |     |

Ping-pong network 16:  
Sequence Logo 3.5.0 (toolshed.g2.bx.psu.edu/repos/devteam/weblogo3/rqweblogo3/3.5.0)

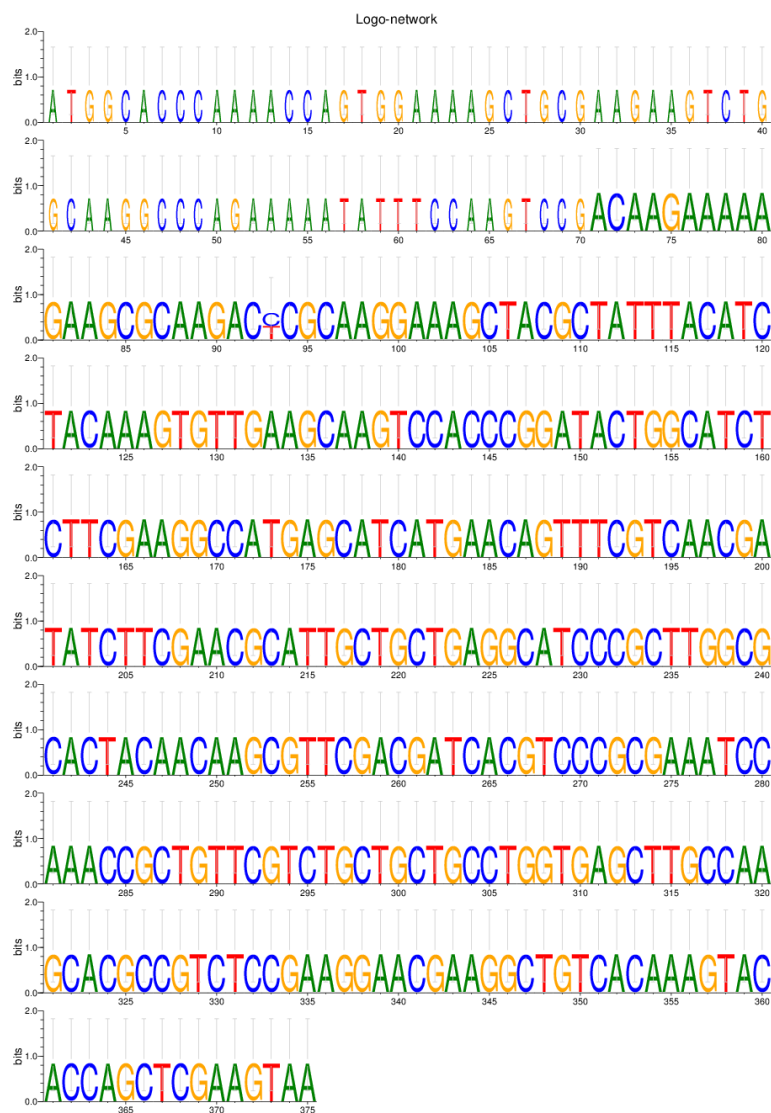

[illegible]

AGAP013541-RA GAACGGCTTGTGGCGGTATGTACGGCTGAAACAAAAGCTTAATTTAATTTACAGCAGCAGA 1142  
AGAP027986-RA GAACGGCTTGTGGCGGTATGTACGGCTGAAACAAAAGCTTAATTTAATTTACAGCAGCAGA 1202  
\*\*\*\*\*

AGAP013541-RA TAAAGGGAAGTCAGGATACTCATGCCAAATCATCCGTGCGTATCGTGGTACCATCCGGTG 1202  
AGAP027986-RA TAAAGGGAAGTCAGGATACTCATGCCAAATCATCCGTGCGTATCGTGGTACCATCCGGTG 1262  
\*\*\*\*\*

AGAP013541-RA CTGGGAAACGTTTATAGACAGCTCTGCGA-GTACA-GTAT-CGGACAGAAAGATAGGGCA 1259  
AGAP027986-RA CTGGGAAACGTTTATAGACAGCTCTGCGAAGTATGTGTGTGCGGTCCGGTTGCAGAAGCT 1322  
\*\*\*\*\* \*\* \* \* \* \* \*

AGAP013541-RA TTGGTTTTTTAACGCACCGTGCACCCGTTGGGCCAAGTTTTATGTGTGGTTTGTATGTGTT 1319  
AGAP027986-RA GTGA----- 1326  
\*\*

AGAP013541-RA TGTGTTTGTGTGTGTGTATGTGTGTGTATGTGTGTGTGTGTGTATGTGTGTG 1379  
AGAP027986-RA -----

AGAP013541-RA TGTGTGTATGTGTGTGTGCATATGTGTGTGTGTGGATGTATGTTTGA 1428  
AGAP027986-RA -----

Ping-pong network 17:  
Sequence Logo 3.5.0 ([toolshed.g2.bx.psu.edu/repos/devteam/weblogo3/rweblogo3/3.5.0](http://toolshed.g2.bx.psu.edu/repos/devteam/weblogo3/rweblogo3/3.5.0))

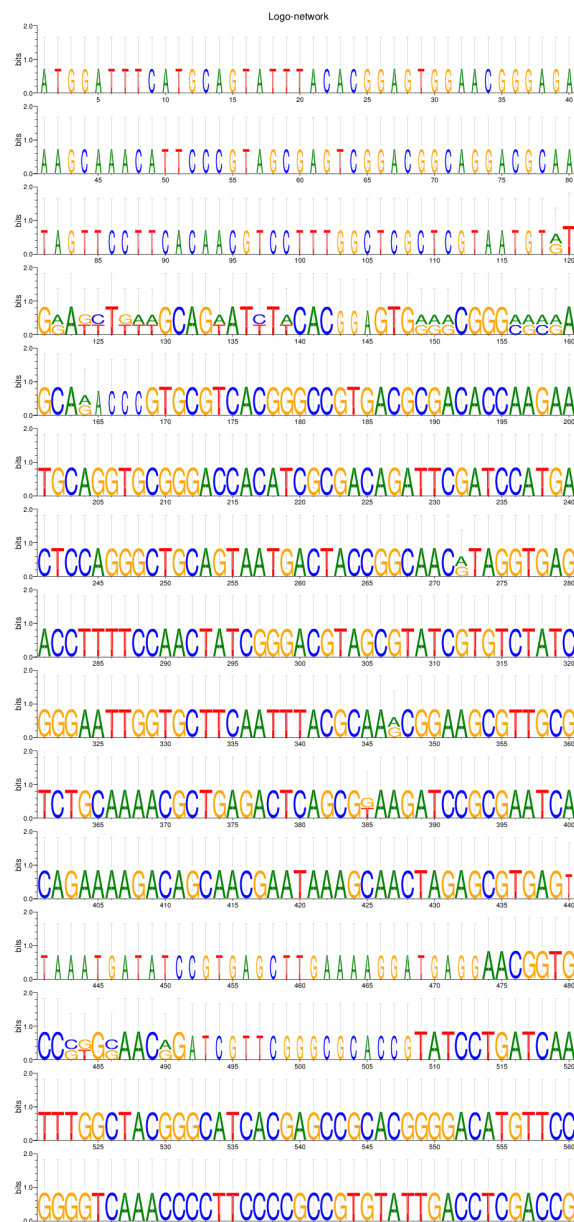



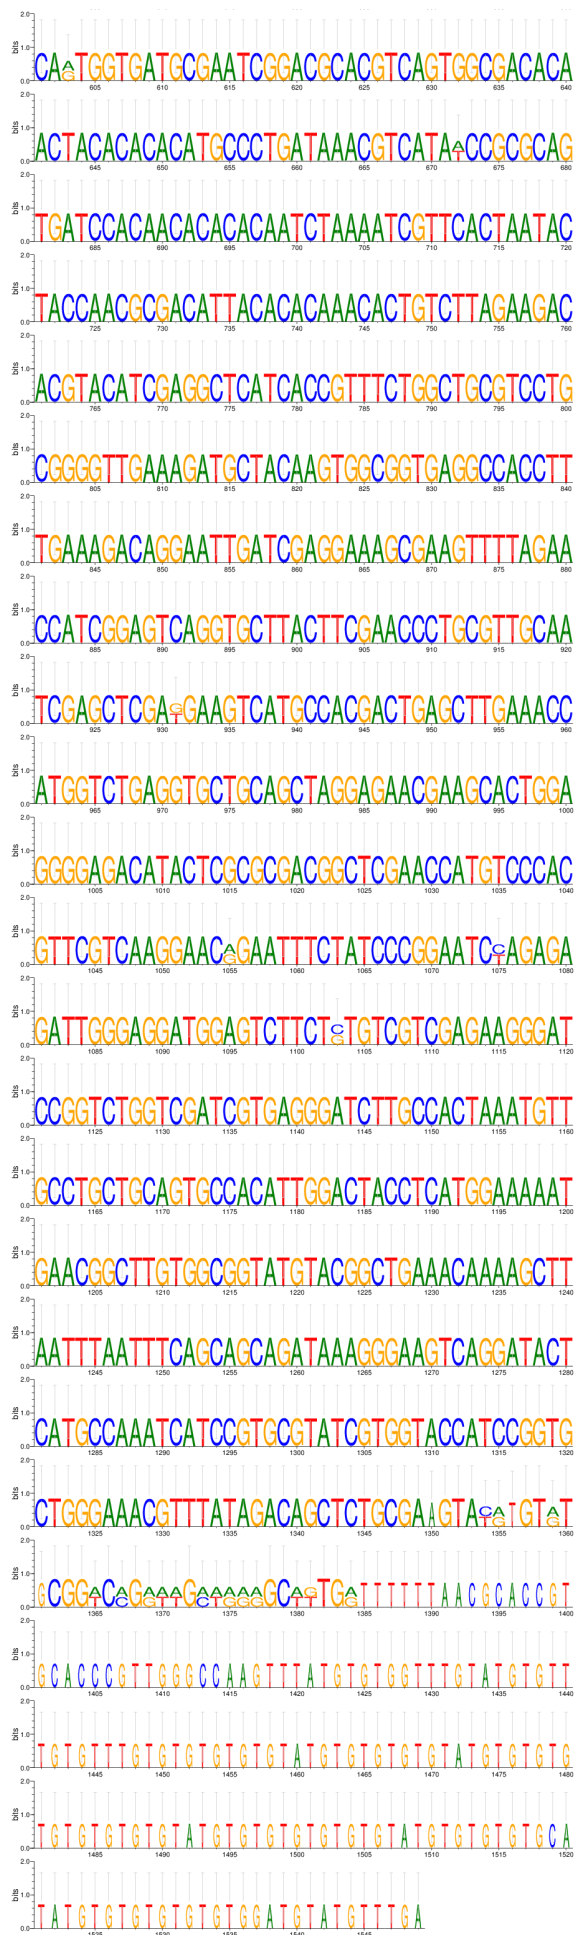

Supplement: s1 [file s1]
