# Supplementary material for: Conserved Small Nucleotidic Elements at the Origin of Concerted piRNA Biogenesis from Genes and lncRNAs
Source: MDPI journal article supplement (doi:10.3390/cells9061491), 2020-06-18

**Supplemental Information: Multiple sequence alignments and consensus sequences of *An. gambiae*, *Ae. aegypti*, mouse and human snetDNAs**

snetDNA

---

trigger-annealing site in 2R\_Incs\_14

---

responder-piRNA sequence in 2R\_Incs\_14

---

**Query: 2R\_Incs\_14 pos. 1163-1213**

2L:2682837-2682869

3L:35162967-35162986

X:12840371-12840389

X:12839798-12839816

X:12839225-12839243

X:12838390-12838408

X:12837817-12837835

X:12837296-12837314

X:12836720-12836738

X:12836147-12836165

X:12831411-12831429

X:12736068-12736087

2R:1828902-1828925

2R:34646320-34646346

3R:22907962-22907980

2R:44005492-44005514

2R:11399110-11399134

X:7474122-7474148

**Consensus**

**Multiple alignment and consensus of *Ae. aegypti* snetDNAs matching to 2R\_Incs\_14 positions 1163-1221:**

snetDNA

trigger-annealing site in 2R\_Incs\_14

responder-piRNA sequence in 2R\_Incs\_14

Query: 2R\_Incs\_14 pos. 1163-1213

AAGE02019858.1:17107-17131  
AAGE02007761.1:58454-58478  
AAGE02021956.1:138605-138629  
AAGE02020341.1:44292-44316  
AAGE02020341.1:18585-18609  
AAGE02004341.1:70165-70189  
AAGE02004341.1:69379-69403  
AAGE02000255.1:7253-7277  
AAGE02000766.1:78834-78858  
AAGE02020342.1:102774-102798  
AAGE02000767.1:20678-20719  
AAGE02020340.1:13637-13674  
AAGE02000255.1:7728-7765  
AAGE02019858.1:17418-17441  
AAGE02007761.1:58131-58154  
AAGE02020341.1:44760-44783  
AAGE02020341.1:19053-19076  
AAGE02004341.1:69077-69100  
AAGE02000766.1:78609-78632  
AAGE02020342.1:102027-102050  
AAGE02008243.1:202383-202418  
AAGE02016552.1:14326-14364  
AAGE02005073.1:5123-5153  
AAGE02006953.1:82333-82370  
AAGE02004850.1:76047-76073  
AAGE02000093.1:90738-90765

## Consensus

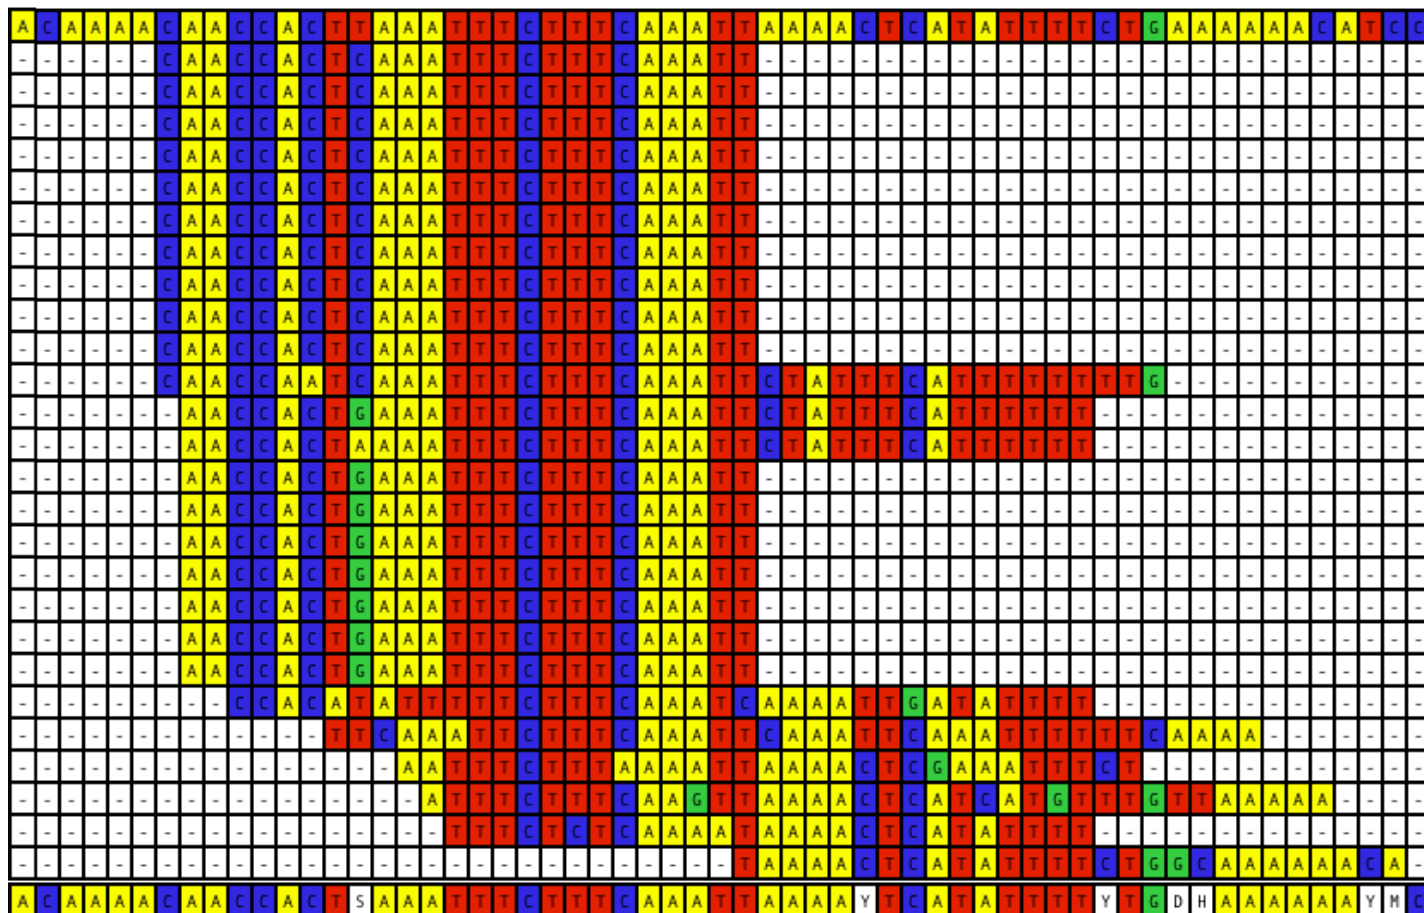

# Multiple alignment and consensus of mouse snetDNAs matching to 2R\_Incs\_14 positions 1163-1231:

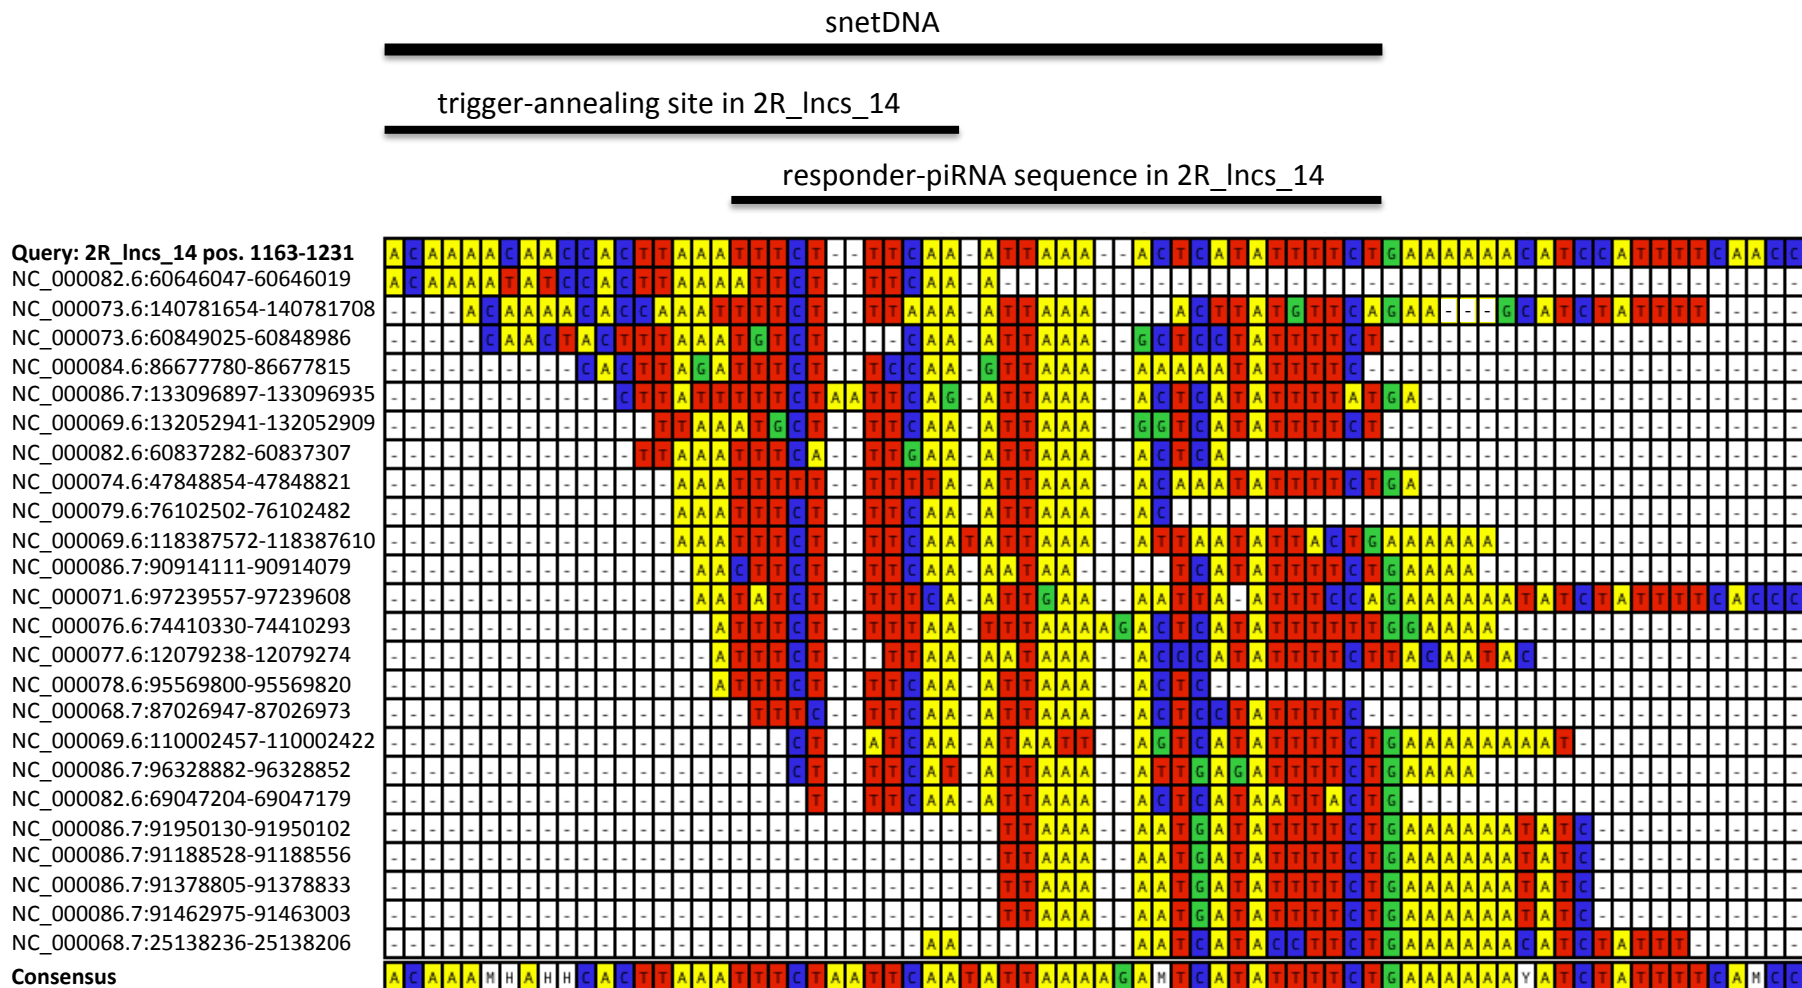

# Multiple alignment and consensus of human snetDNAs matching to 2R\_Incs\_14 positions 1141-1227:

snetDNA

trigger-annealing site in 2R\_Incs\_14

responder-piRNA sequence in 2R\_Incs\_14

Query: 2R\_Incs\_14 pos. 1163-1227

NC\_000020.11:6762543-6762597  
NC\_000004.12:2438618-2438570  
NC\_000018.10:10319516-10319479  
NC\_000011.10:111307218-111307178  
NC\_000016.10:76589622-76589675  
NC\_000003.12:156479653-156479599  
NC\_000007.14:45044910-45044861  
NC\_000002.12:232919598-232919625  
NC\_000002.12:12251393-12251428  
NC\_000008.11:92107154-92107101  
NC\_000007.14:35848146-35848192  
NC\_000005.10:155676695-155676664  
NC\_000008.11:128583549-128583514  
NC\_000004.12:101186634-101186669  
NC\_000014.9:22171401-22171364  
NC\_000007.14:136507771-136507806  
NC\_000006.12:68915115-68915081  
NC\_000004.12:116879825-116879850  
NC\_000005.10:127533974-127533950  
NC\_000008.11:16778224-16778201  
NC\_000002.12:123953165-123953115  
NC\_000005.10:83192082-83192030  
NC\_000005.10:127893920-127893964  
NC\_000014.9:27519835-27519801  
NC\_000001.11:113166918-113166952  
NC\_000021.9:21250632-21250667  
NC\_000007.14:114556057-114556004  
NC\_000021.9:30350547-30350576  
NC\_000016.10:47382096-47382055  
NC\_000005.10:44486189-44486219

Consensus

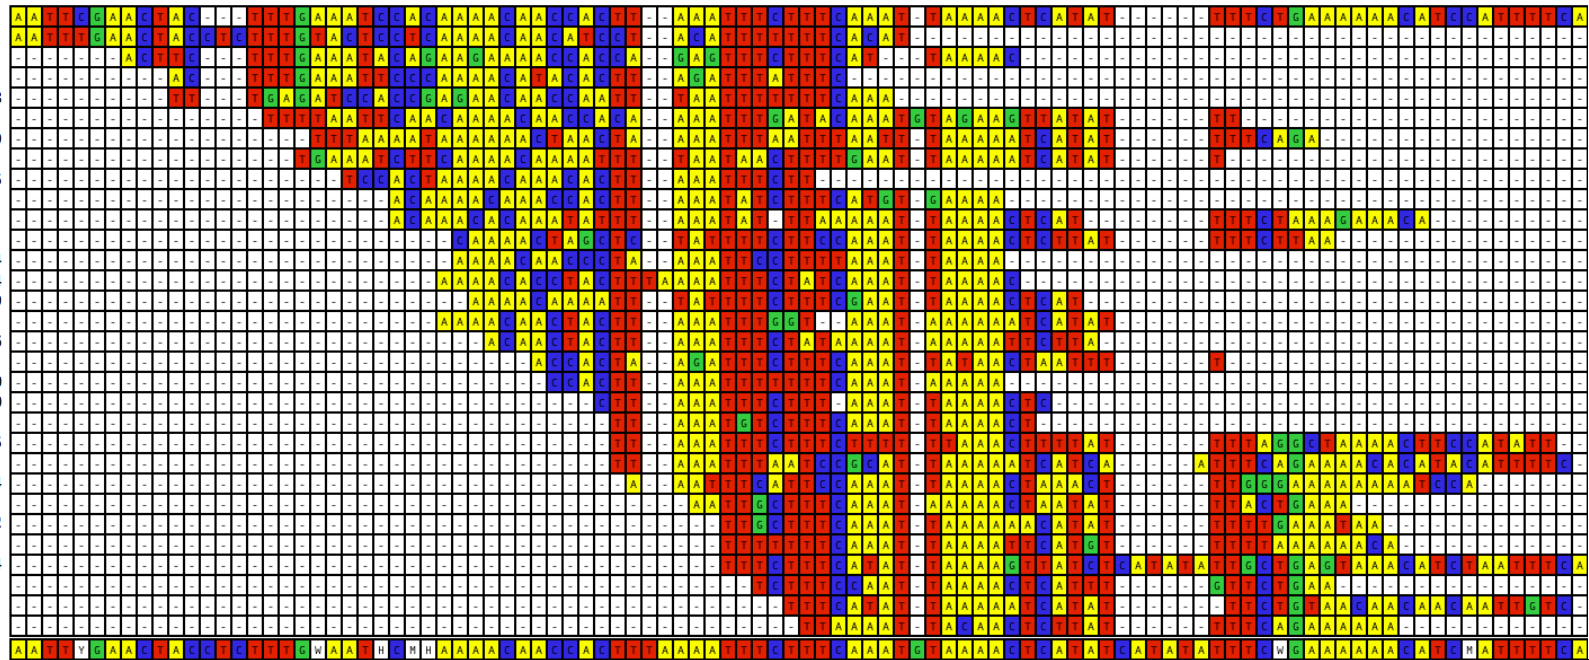

### Multiple alignment and consensus of *An. gambiae* snetDNAs matching to AGAP011923-RA positions 231-284:

# snetDNA

## trigger-annealing site in AGAP011923-RA

responder-piRNA sequence in AGAP011923-RA

Query: AGAP011923-RA pos. 231-284

2R:34612118-34612158

2R:34611963-34612006

2R:49667842-49667865

2R:56222244-56222265

2R:32675196-32675229

3R:1423490-1423512

2R:1828980-1829008

31:7773232-7773258

31:7750866-7750892

3L:7695019-7695045

X:12830996-12831022

X-12840529-12840555

X-12839956-12839982

X:12839383-12839409

Y-12837975-12838001

X:12836878-12836904

Y:12836305-12836331

X:12735359-12735383

Y-12840371-12840393

Y:12820708 12820820

Y:12839225-12839247

Y:12838300 12838412

Y:12827817 12827820

Y:12827206 12827219

Y:12836720 12836743

Y:12836147 12836160

Y:12031411 12031433

2D: 27218128, 27218161

2D:27218281 27218402

2R.37210301-37210403  
2R.37210305-37210309

2R.37218050-37218081  
2R.1828453-1828474

2R.1629152-1629171

A.12/36068-12/36086

2R.1628902-1628919

## Consensus

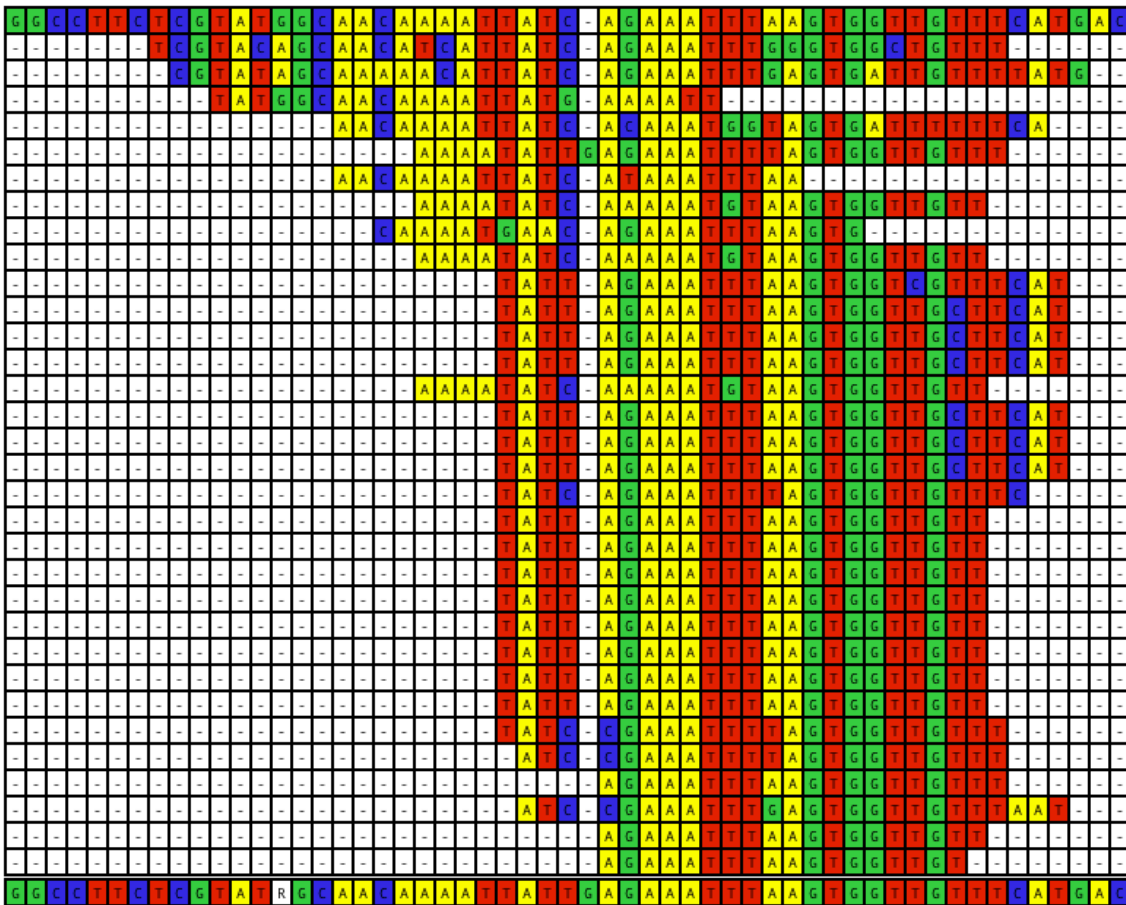

Multiple alignment and consensus of *Ae. aegypti* snetDNAs matching to AGAP011923-RA positions 231-284:

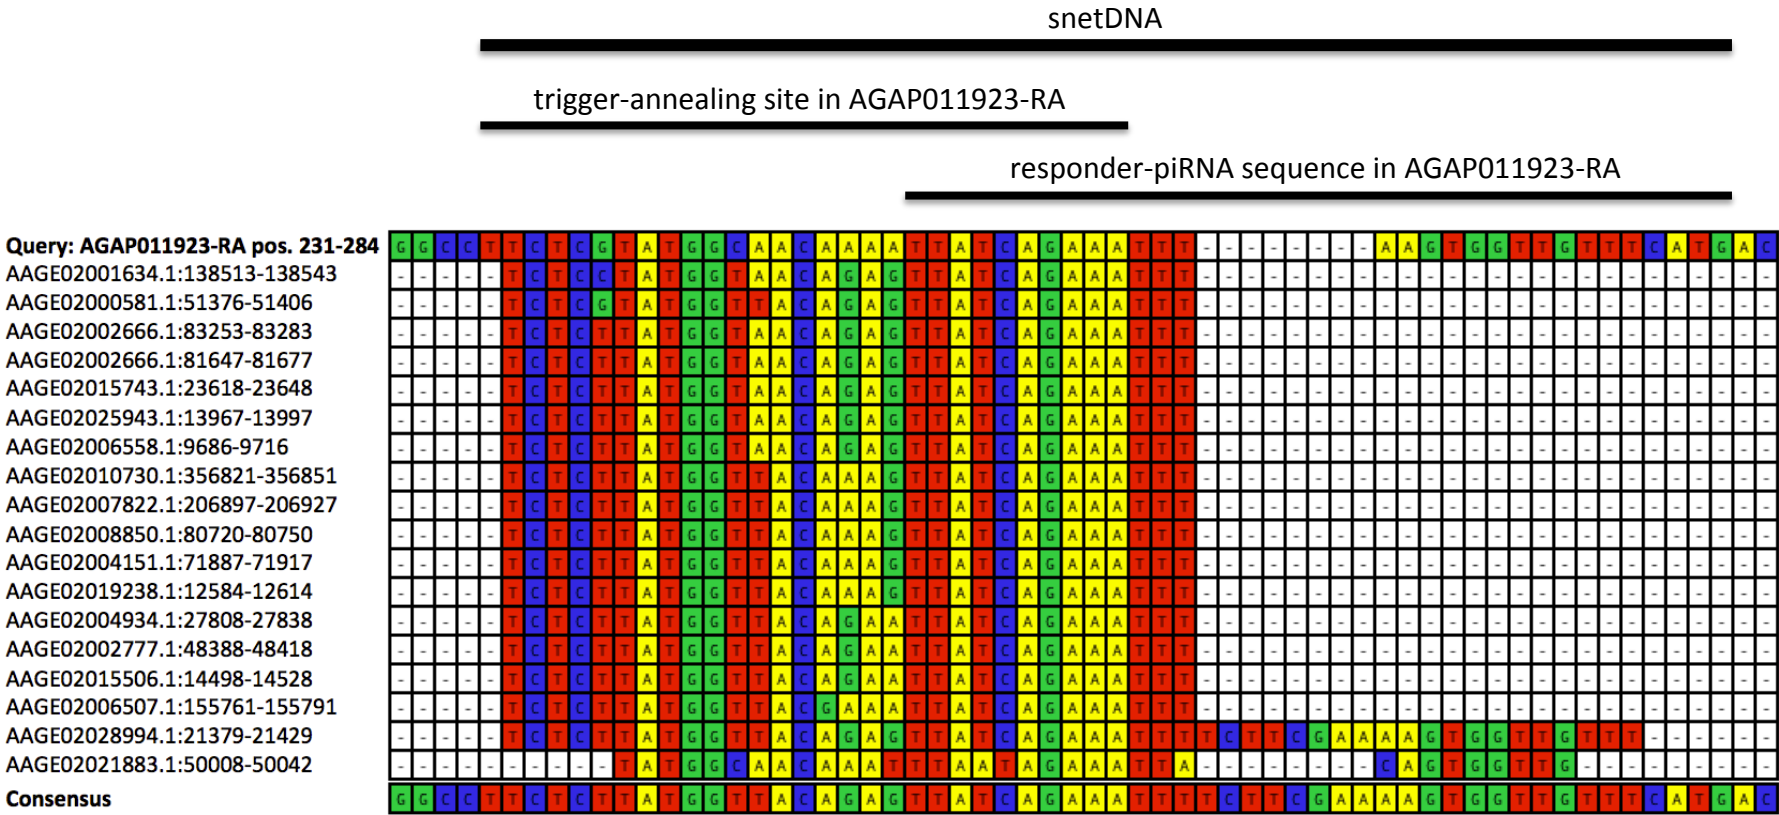

Multiple alignment and consensus of mouse snetDNAs matching to AGAP011923-RA positions 231-284:

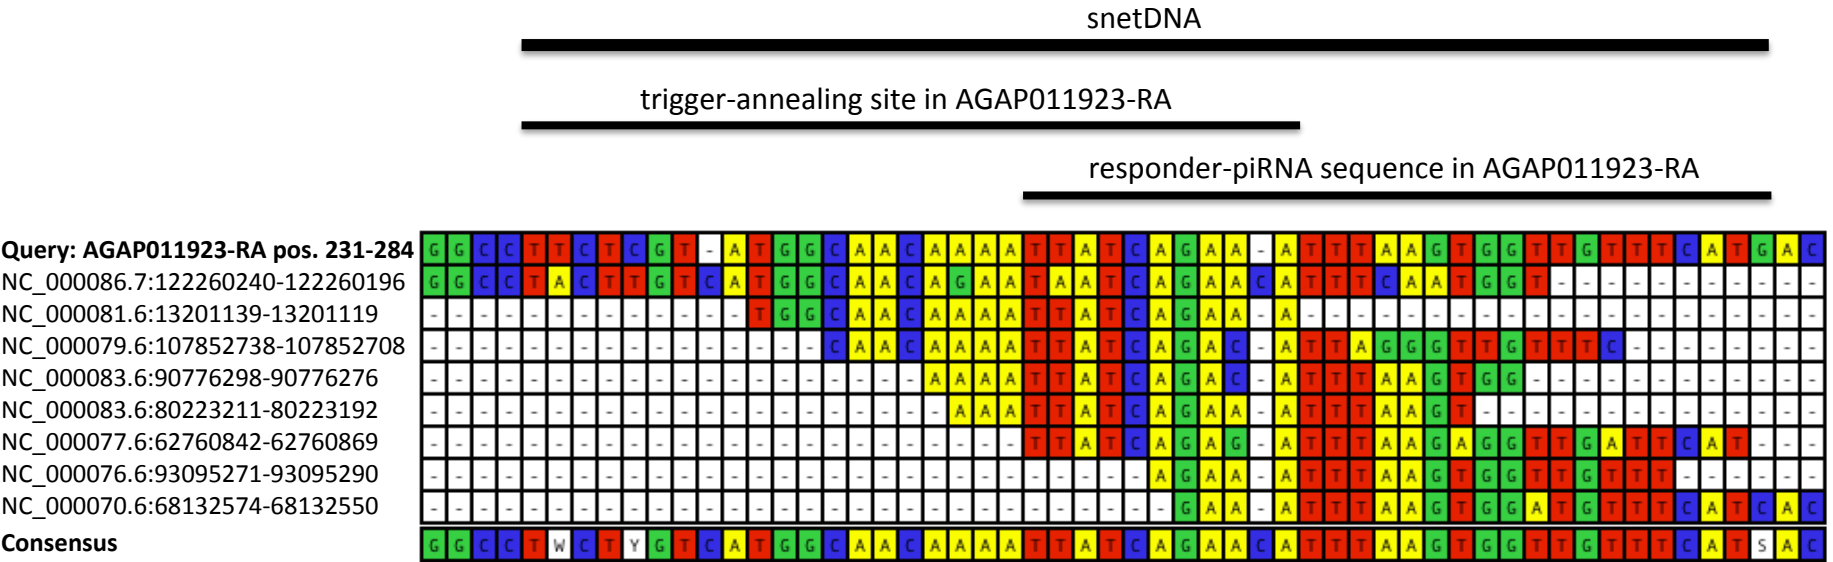



### Multiple alignment and consensus of human snetDNAs matching to AGAP011923-RA positions 231-290:

snetDNA

trigger-annealing site in AGAP011923-RA

responder-piRNA sequence in AGAP011923-RA

Query: AGAP011923-RA pos. 231-290

NC\_000001.11:215425757-215425793

NC\_000004.12:19540137-19540103

NC\_000002.12:10443999-10444050

NC\_000009.12:26175790-26175821

NC\_000023.11:113736746-113736708

NC\_000010.11:60478615-60478595

NC\_000006.12:101351131-101351097

NC\_000002.12:197087120-197087090

NC\_000020.11:48021859-48021893

NC\_000014.9:43878706-43878739

## Consensus

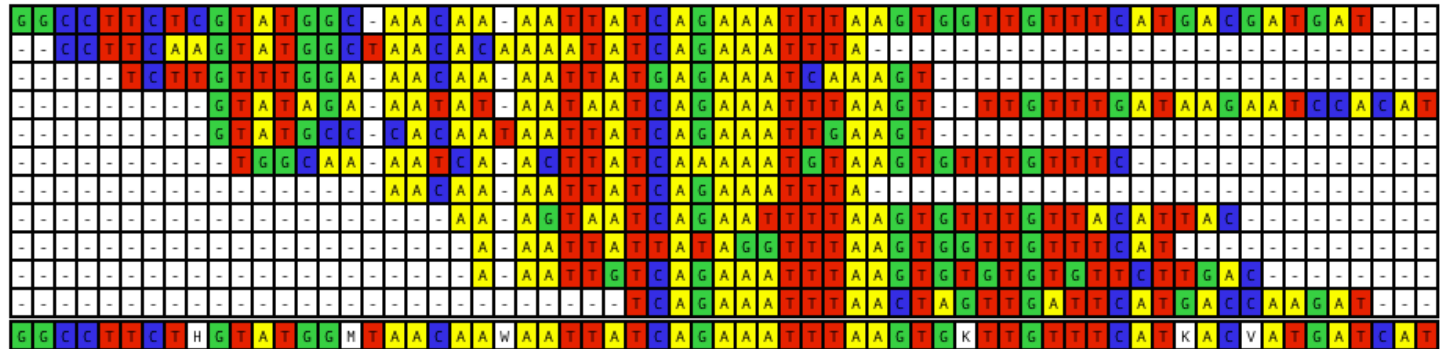

Supplement: s1 [file s1]
